# Supplementary material for: Bi- and poly(carbyne) functionalised polycyclic aromatics
Source: Royal Society of Chemistry journal article supplement (doi:10.1039/d0cc00786b), 2020-01-01
Supplement: d0cc00786b1.pdf [file d0cc00786b1.pdf]

## COMMUNICATION

### Electronic Supporting Information for:

### Bi- and Poly(carbyne) functionalised Polycyclic Aromatics

Received 00th January 20xx,  
Accepted 00th January 20xx

DOI: 10.1039/x0xx00000x

Benjamin J. Frogley,<sup>a</sup> Anthony F. Hill<sup>\*a</sup> and Antonia Seitz<sup>a</sup>

#### Table of Contents

|                                       |     |
|---------------------------------------|-----|
| Experimental.....                     | S1  |
| Selected crystallographic data .....  | S5  |
| Notes and references .....            | S6  |
| Selected NMR spectra .....            | S7  |
| Selected IR spectra.....              | S29 |
| Selected UV-Vis spectra.....          | S34 |
| Selected cyclic voltammetry data..... | S39 |

#### Experimental

Experimental work was carried out under a dry and oxygen-free nitrogen atmosphere using standard Schlenk techniques with dried and degassed solvents.

NMR spectra were obtained on a Bruker Avance 400 (<sup>1</sup>H at 400.1 MHz, <sup>13</sup>C at 100.6 MHz, <sup>19</sup>F at 376.5 MHz), a Bruker Avance 600 (<sup>1</sup>H at 600.0 MHz, <sup>13</sup>C at 150.9 MHz) or a Bruker Avance 700 (<sup>1</sup>H at 700.0 MHz, <sup>13</sup>C at 176.1 MHz) spectrometers at the temperatures indicated. Chemical shifts ( $\delta$ ) are reported in ppm with coupling constants given in Hz and are referenced to the solvent peak. The multiplicities of NMR resonances are denoted by the abbreviations s (singlet), d (doublet), t (triplet), m (multiplet), br (broad) and combinations thereof for more highly coupled systems. Where applicable, the stated multiplicity refers to that of the primary resonance exclusive of <sup>183</sup>W satellites. In some cases, distinct peaks were observed in the <sup>1</sup>H and <sup>13</sup>C{<sup>1</sup>H} NMR spectra, but to the level of accuracy that is reportable (i.e., 2 decimal places for <sup>1</sup>H NMR, 1 decimal place for <sup>13</sup>C NMR) they are reported as having the same chemical shift. The abbreviation 'pz' is used to refer to the pyrazolyl rings on the hydridotris(3,5-dimethylpyrazol-1-yl)borate (Tp\*) ligand. Spectra provided generally correspond to samples obtained directly from chromatography and may contain residual solvent as recrystallised samples often display reduced solubility. The BH protons give rise to very broad signals around 4–5 ppm in the <sup>1</sup>H NMR spectra due to coupling to the quadrupolar boron

nuclei. These are not listed in the experimental NMR data as their chemical shifts cannot be determined accurately.

Infrared spectra were obtained using a Shimadzu FTIR-8400 spectrometer. Electronic spectra were collected at room temperature as solution in 1 cm quartz cells using a PerkinElmer lambda 465 spectrophotometer. Fluorescence was measured on a Varian Cary Eclipse fluorescence spectrophotometer at room temperature. Elemental microanalytical data were provided the London Metropolitan University. Solvates evident from data were confirmed by NMR spectroscopy. High-resolution electrospray ionisation mass spectrometry (ESI-MS) was performed by the ANU Research School of Chemistry mass spectrometry service with acetonitrile or methanol as the matrix.

Cyclic voltammetry measurements were recorded using a e-corder 401 potentiostat system from eDAQ Pty Ltd. Measurements were carried out at room temperature using Pt disc working-, Pt wire auxiliary- and Ag/AgCl or SCE reference electrodes, such that the ferrocene/ferrocenium redox couple was located at 0.46 V (CH<sub>2</sub>Cl<sub>2</sub>) relative to saturated calomel electrode ( $i_{pc}/i_{pa} = 1$ ,  $\Delta E_p$  0.09–0.12 V).<sup>1</sup> Scan rates were typically 100 mV s<sup>-1</sup>. Electrochemical solutions contained 0.1 M [NBu<sub>4</sub>][PF<sub>6</sub>] and ca 10<sup>-3</sup> M complex in dried and distilled solvent. Solutions were purged and maintained under a nitrogen atmosphere.

Data for X-ray crystallography were collected with Agilent Xcalibur or SuperNova CCD diffractometer using Mo-K $\alpha$  radiation ( $\lambda = 0.71073$  Å) or Cu-K $\alpha$  radiation ( $\lambda = 1.54184$  Å) employing the CrysAlis PRO software.<sup>2</sup> The structures were solved by direct or Patterson methods and refined by full-matrix least-squares on  $F^2$  using the SHELXS or SHELXT and SHELXL programs.<sup>3</sup> Hydrogen atoms were located geometrically and refined using a riding model. Diagrams were produced using the CCDC visualisation program Mercury.<sup>4</sup>

The synthesis of [W(=CSn<sup>n</sup>Bu<sub>3</sub>)(CO)<sub>2</sub>(Tp\*)] (**1**)<sup>5</sup> has been described previously. The complex [AuCl(SMe<sub>2</sub>)]<sup>6</sup> was prepared by literature methods. Commercially available haloarenes were used as received. 1,3,5,8-tetrabromopyrene was prepared by the literature methods.<sup>7</sup> Petrol refers to petroleum spirits (40–

60 °C) and these terms are used interchangeably. Where appropriate, quoted yields relate to solvates as obtained.

**[W(≡CSn<sup>n</sup>Bu<sub>3</sub>)(CO)<sub>2</sub>(Tp\*)] (2).** A solution of [W(≡CSn<sup>n</sup>Bu<sub>3</sub>)(CO)<sub>2</sub>(Tp\*)] (500 mg, 0.596 mmol), 1,2-dibromobenzene (142 mg, 0.60 mmol), [Pd(PPh<sub>3</sub>)<sub>4</sub>] (69 mg, 0.060 mmol) and [AuCl(SMe<sub>2</sub>)] (17 mg, 0.058 mmol) in toluene (20 mL) was heated under reflux for 6 h, during which time the solution turned red-brown. After this time, the solvent was removed under reduced pressure and the residue was subjected to column chromatography (50 x 3 cm silica gel column), eluting with 10% v/v dichloromethane/petroleum spirits (40–60 °C). A red-orange band was collected and the volatiles were removed under reduced pressure to give **2**·0.5(C<sub>6</sub>H<sub>14</sub>) as an orange solid (344 mg, 0.460 mmol, 77% based on **1**). IR (CH<sub>2</sub>Cl<sub>2</sub>, cm<sup>-1</sup>): 1976s, 1881s ν<sub>CO</sub>. UV-Vis (CH<sub>2</sub>Cl<sub>2</sub>): λ<sub>max</sub> = 495 (ε = 72 L<sup>-1</sup>mol<sup>-1</sup>cm<sup>-1</sup>). <sup>1</sup>H NMR (700 MHz, CDCl<sub>3</sub>, 25 °C): δ<sub>H</sub> = 2.36 (s, 3H, pzCH<sub>3</sub>), 2.40 (s, 6H, pzCH<sub>3</sub>), 2.47 (s, 9H, pzCH<sub>3</sub>), 5.80 (s, 1H, pzCH), 5.89 (s, 2H, pzCH), 7.14 (t'd, <sup>3</sup>J<sub>HH</sub> = 7.7, <sup>4</sup>J<sub>HH</sub> = 1.6, 1H, C<sub>6</sub>H<sub>14</sub>), 7.25 (t'd, <sup>3</sup>J<sub>HH</sub> = 7.7, <sup>4</sup>J<sub>HH</sub> = 1.2, 1H, C<sub>6</sub>H<sub>14</sub>), 7.44 (d, <sup>3</sup>J<sub>HH</sub> = 7.8, 1H, C<sub>6</sub>H<sub>14</sub>), 7.46 (dd, <sup>3</sup>J<sub>HH</sub> = 7.7, <sup>4</sup>J<sub>HH</sub> = 1.6, 1H, C<sub>6</sub>H<sub>14</sub>). <sup>13</sup>C{<sup>1</sup>H} NMR (176 MHz, CDCl<sub>3</sub>, 25 °C): δ<sub>C</sub> = 12.7, 12.9, 15.4, 16.7 (pzCH<sub>3</sub>), 106.4, 106.8 (pzCH), 121.8, 127.1, 128.2, 132.5, 133.8 (C<sub>6</sub>H<sub>14</sub>), 144.5, 145.2 (pzCCH<sub>3</sub>), 148.9 (W≡CC, <sup>2</sup>J<sub>CW</sub> = 43), 152.1, 152.5 (pzCCH<sub>3</sub>), 224.7 (CO, <sup>1</sup>J<sub>CW</sub> = 165), 274.8 (W≡C, <sup>1</sup>J<sub>CW</sub> = 195). MS (ESI, *m/z*): Found: 705.09804. Calcd for C<sub>24</sub>H<sub>27</sub><sup>11</sup>B<sup>79</sup>BrN<sub>6</sub>O<sub>2</sub><sup>184</sup>W [M+H]<sup>+</sup>: 705.09758. Anal. Found: C, 43.44; H, 4.55; N, 11.22%. Calcd for C<sub>24</sub>H<sub>26</sub>BB<sup>n</sup>BrN<sub>6</sub>O<sub>2</sub>W·0.5(C<sub>6</sub>H<sub>14</sub>): C, 43.34; H, 4.45; N, 11.23%. <sup>1</sup>H NMR spectroscopy indicated the presence of ca. 0.5 equivalents of C<sub>6</sub>H<sub>14</sub> of solvation was present in the sample used for elemental analysis.

Crystals suitable for structure determination were grown by slow evaporation of a CH<sub>2</sub>Cl<sub>2</sub>/ethanol mixture at 4 °C and proved to be a dichloromethane solvate. *Crystal data for* C<sub>25</sub>H<sub>28</sub>BB<sup>n</sup>BrCl<sub>2</sub>N<sub>6</sub>O<sub>2</sub>W (*M* = 790.00 g·mol<sup>-1</sup>): monoclinic, space group P2<sub>1</sub>/c (no. 14), *a* = 16.3710(6), *b* = 10.3034(5), *c* = 17.1373(6) Å, β = 94.539(4)°, *V* = 2881.6(2) Å<sup>3</sup>, *Z* = 4, *T* = 150.0(1) K, μ(MoKα) = 5.615 mm<sup>-1</sup>, *D*<sub>calc</sub> = 1.821 g·cm<sup>-3</sup>, 15174 reflections measured (6.626° ≤ 2θ ≤ 57.82°), 6031 unique (*R*<sub>int</sub> = 0.0304, *R*<sub>sigma</sub> = 0.0399) which were used in all calculations. The final *R*<sub>1</sub> was 0.0384 (*I* > 2σ(*I*)) and *wR*<sub>2</sub> was 0.0999 (all data) for 353 refined parameters with 36 restraints. CCDC 1963667.

**[1,3-((Tp\*)(CO)<sub>2</sub>W≡C)<sub>2</sub>C<sub>6</sub>H<sub>4</sub>] (3).** A solution of [W(≡CSn<sup>n</sup>Bu<sub>3</sub>)(CO)<sub>2</sub>(Tp\*)] (500 mg, 0.596 mmol), 1,3-dibromobenzene (68 mg, 0.29 mmol), [Pd(PPh<sub>3</sub>)<sub>4</sub>] (69 mg, 0.060 mmol) and [AuCl(SMe<sub>2</sub>)] (17 mg, 0.058 mmol) in toluene (20 mL) was heated under reflux for 14 h, during which time the solution turned red-brown. After this time, the solvent was removed under reduced pressure and the residue was subjected to column chromatography (50 x 3 cm silica gel column), eluting with 10% v/v dichloromethane/petroleum spirits (40–60 °C). An orange band was collected, the volatiles were removed under reduced pressure and the residue was recrystallized from CH<sub>2</sub>Cl<sub>2</sub>/ethanol to **3** as an orange solid (212 mg, 0.181 mmol, 61% based on **1**). IR (CH<sub>2</sub>Cl<sub>2</sub>, cm<sup>-1</sup>): 1973s, 1884s ν<sub>CO</sub>. UV-Vis (CH<sub>2</sub>Cl<sub>2</sub>): λ<sub>max</sub> = 471 (ε = 308 L<sup>-1</sup>mol<sup>-1</sup>cm<sup>-1</sup>). <sup>1</sup>H NMR (700 MHz, CDCl<sub>3</sub>, 25 °C): δ<sub>H</sub> = 2.36 (s, 6H, pzCH<sub>3</sub>), 2.40 (s, 12H, pzCH<sub>3</sub>), 2.47 (s, 6H, pzCH<sub>3</sub>), 2.55 (s, 12H, pzCH<sub>3</sub>), 5.80 (s, 2H, pzCH), 5.91 (s,

4H, pzCH), 7.23 (t', <sup>3</sup>J<sub>HH</sub> = 7.7, 1H, C<sub>6</sub>H<sub>4</sub>), 7.41 (d, <sup>3</sup>J<sub>HH</sub> = 7.7, 2H, C<sub>6</sub>H<sub>4</sub>), 7.51 (s, 1H, C<sub>6</sub>H<sub>4</sub>). <sup>13</sup>C{<sup>1</sup>H} NMR (176 MHz, CDCl<sub>3</sub>, 25 °C): δ<sub>C</sub> = 12.7, 12.8, 15.4, 16.7 (pzCH<sub>3</sub>), 106.6, 106.7 (pzCH), 128.0, 128.2, 129.5 (C<sub>6</sub>H<sub>4</sub>), 144.5, 145.1 (pzCCH<sub>3</sub>), 150.0 (W≡CC, <sup>2</sup>J<sub>CW</sub> = 43), 152.1, 152.5 (pzCCH<sub>3</sub>), 223.9 (CO, <sup>1</sup>J<sub>CW</sub> = 165), 277.3 (W≡C, <sup>1</sup>J<sub>CW</sub> = 187). MS (ESI, *m/z*): Found: 1175.31955. Calcd for C<sub>42</sub>H<sub>49</sub><sup>11</sup>B<sup>2</sup>N<sub>12</sub>O<sub>4</sub><sup>184</sup>W<sub>2</sub> [M+H]<sup>+</sup>: 1175.32060. Anal. Found: C, 42.85; H, 3.98; N, 14.27. Calcd for C<sub>42</sub>H<sub>48</sub>B<sup>2</sup>N<sub>12</sub>O<sub>4</sub>W<sub>2</sub>: C, 42.96; H, 4.12; N, 14.31%.

**[1,4-((Tp\*)(CO)<sub>2</sub>W≡C)<sub>2</sub>C<sub>6</sub>H<sub>4</sub>] (4).** A solution of [W(≡CSn<sup>n</sup>Bu<sub>3</sub>)(CO)<sub>2</sub>(Tp\*)] (500 mg, 0.596 mmol), 1,4-diiodobenzene (96 mg, 0.29 mmol), [Pd(PPh<sub>3</sub>)<sub>4</sub>] (69 mg, 0.060 mmol) and [AuCl(SMe<sub>2</sub>)] (17 mg, 0.058 mmol) in toluene (20 mL) was heated under reflux for 6 h, during which time the solution turned red-brown. After this time, the solvent was removed under reduced pressure and the residue was subjected to column chromatography (50 x 3 cm silica gel column), eluting with 10% v/v dichloromethane/petroleum spirits (40–60 °C). A red band was collected and the volatiles were removed under reduced pressure to give **4** as a red solid (270 mg, 0.230 mmol, 77% based on **1**). IR (CH<sub>2</sub>Cl<sub>2</sub>, cm<sup>-1</sup>): 1969s, 1884s ν<sub>CO</sub>. UV-Vis (CH<sub>2</sub>Cl<sub>2</sub>): λ<sub>max</sub> = 521 (ε = 1399 L<sup>-1</sup>mol<sup>-1</sup>cm<sup>-1</sup>). <sup>1</sup>H NMR (400 MHz, CDCl<sub>3</sub>, 25 °C): δ<sub>H</sub> = 2.34 (s, 6H, pzCH<sub>3</sub>), 2.38 (s, 12H, pzCH<sub>3</sub>), 2.44 (s, 6H, pzCH<sub>3</sub>), 2.50 (s, 12H, pzCH<sub>3</sub>), 5.78 (s, 2H, pzCH), 5.89 (s, 4H, pzCH), 7.31 (s, 4H, C<sub>6</sub>H<sub>4</sub>). <sup>13</sup>C{<sup>1</sup>H} NMR (176 MHz, CDCl<sub>3</sub>, 25 °C): δ<sub>C</sub> = 12.8, 12.8, 15.4, 16.8 (pzCH<sub>3</sub>), 106.6, 106.8 (pzCH), 128.9 (C<sub>6</sub>H<sub>4</sub>{CH}), 144.6, 145.2 (pzCCH<sub>3</sub>), 148.8 (W≡CC), 152.1, 152.5 (pzCCH<sub>3</sub>), 224.3 (CO), 278.2 (W≡C). MS (ESI, *m/z*): Found: 1175.32070. Calcd for C<sub>42</sub>H<sub>49</sub><sup>11</sup>B<sup>2</sup>N<sub>12</sub>O<sub>4</sub><sup>184</sup>W<sub>2</sub> [M+H]<sup>+</sup>: 1175.32061. Anal. Found: C, 43.06; H, 4.22; N, 14.07. Calcd for C<sub>42</sub>H<sub>48</sub>B<sup>2</sup>N<sub>12</sub>O<sub>4</sub>W<sub>2</sub>: C, 42.96; H, 4.12; N, 14.31%.

A crystal suitable for structure determination were grown by slow evaporation of a cyclohexane solution at 4 °C and proved to be a cyclohexane pentasolvate. *Crystal data for* C<sub>72</sub>H<sub>108</sub>B<sup>2</sup>N<sub>12</sub>O<sub>4</sub>W<sub>2</sub> (*M* = 1595.02 g·mol<sup>-1</sup>): monoclinic, space group P2<sub>1</sub>/c (no. 14), *a* = 13.2449(8), *b* = 18.7892(6), *c* = 16.1898(7) Å, β = 107.336(6)°, *V* = 3846.0(3) Å<sup>3</sup>, *Z* = 2, *T* = 150.0(1) K, μ(CuKα) = 5.851 mm<sup>-1</sup>, *D*<sub>calc</sub> = 1.377 g·cm<sup>-3</sup>, 11888 reflections measured (6.992° ≤ 2θ ≤ 141.64°), 7133 unique (*R*<sub>int</sub> = 0.0320, *R*<sub>sigma</sub> = 0.0624) which were used in all calculations. The final *R*<sub>1</sub> was 0.0485 (*I* > 2σ(*I*)) and *wR*<sub>2</sub> was 0.1246 (all data) for 444 refined parameters with 102 restraints. CCDC 1963668.

**[1,3,5-((Tp\*)(CO)<sub>2</sub>W≡C)<sub>3</sub>C<sub>6</sub>H<sub>3</sub>] (5).** A solution of [W(≡CSn<sup>n</sup>Bu<sub>3</sub>)(CO)<sub>2</sub>(Tp\*)] (500 mg, 0.596 mmol), 1,3,5-tribromobenzene (60 mg, 0.19 mmol), [Pd(PPh<sub>3</sub>)<sub>4</sub>] (69 mg, 0.060 mmol) and [AuCl(SMe<sub>2</sub>)] (17 mg, 0.058 mmol) in toluene (20 mL) was heated under reflux for 14 h, during which time the solution turned red-brown. After this time, the solvent was removed under reduced pressure and the residue was subjected to column chromatography (50 x 3 cm silica gel column), eluting with 20% v/v dichloromethane/petroleum spirits (40–60 °C). A red band was collected and the volatiles were removed under reduced pressure to give **5** as a red solid (168 mg, 0.0975 mmol, 49% based on **1**). IR (CH<sub>2</sub>Cl<sub>2</sub>, cm<sup>-1</sup>): 1974s, 1889s ν<sub>CO</sub>. UV-Vis (CH<sub>2</sub>Cl<sub>2</sub>): λ<sub>max</sub> = 498 (ε = 974 L<sup>-1</sup>mol<sup>-1</sup>cm<sup>-1</sup>). <sup>1</sup>H NMR (400 MHz, CDCl<sub>3</sub>, 25 °C): δ<sub>H</sub> = 2.35 (s, 9H, pzCH<sub>3</sub>), 2.38 (s, 18H, pzCH<sub>3</sub>), 2.46

(s, 9H, pzCH<sub>3</sub>), 2.56 (s, 18H, pzCH<sub>3</sub>), 5.79 (s, 3H, pzCH), 5.91 (s, 6H, pzCH), 7.46 (s, 3H, C<sub>6</sub>H<sub>4</sub>). <sup>13</sup>C{<sup>1</sup>H} NMR (101 MHz, CDCl<sub>3</sub>, 25 °C): δ<sub>c</sub> = 12.8, 12.8, 15.4, 16.9 (pzCH<sub>3</sub>), 106.6, 106.7 (pzCH), 128.3 (C<sub>6</sub>H<sub>4</sub>{CH}), 144.5, 145.1 (pzCCH<sub>3</sub>), 149.7 (W≡CC, <sup>2</sup>J<sub>CW</sub> = 43), 152.1, 152.5 (pzCCH<sub>3</sub>), 223.7 (CO, <sup>1</sup>J<sub>CW</sub> = 165), 276.2 (W≡C, <sup>1</sup>J<sub>CW</sub> = 189). MS (ESI, *m/z*): Found: 1723.45549. Calcd for C<sub>60</sub>H<sub>70</sub><sup>11</sup>B<sub>3</sub>N<sub>18</sub>O<sub>6</sub><sup>184</sup>W<sub>3</sub> [M+H]<sup>+</sup>: 1723.45334. Anal. Found: C, 41.97; H, 4.12; N, 14.61. Calcd for C<sub>60</sub>H<sub>69</sub>B<sub>3</sub>N<sub>18</sub>O<sub>6</sub>W<sub>3</sub>: C, 41.84; H, 4.04; N, 14.64%.

A crystal suitable for structure determination was grown by slow evaporation of a chloroform/ethanol mixture. *Crystal data* for C<sub>60</sub>H<sub>69</sub>B<sub>3</sub>N<sub>18</sub>O<sub>6</sub>W<sub>3</sub> (*M* = 1722.31 g.mol<sup>-1</sup>): monoclinic, space group P2<sub>1</sub>/n (no. 14), *a* = 14.1626(3), *b* = 36.3631(7), *c* = 14.8716(3) Å, β = 90.019(2)°, *V* = 7658.8(3) Å<sup>3</sup>, *Z* = 4, *T* = 150.0(1) K, μ(CuKα) = 8.586 mm<sup>-1</sup>, *D*<sub>calc</sub> = 1.494 g.cm<sup>-3</sup>, 43467 reflections measured (7.68° ≤ 2θ ≤ 142.16°), 14567 unique (*R*<sub>int</sub> = 0.0547, *R*<sub>sigma</sub> = 0.0605) which were used in all calculations. The final *R*<sub>1</sub> was 0.0546 (*I* > 2σ(*I*)) and *wR*<sub>2</sub> was 0.1535 (all data) for 841 refined parameters with 1 restraint. CCDC 1963669.

**[1-{(Tp\*)}(CO)<sub>2</sub>W≡C]C<sub>10</sub>H<sub>7</sub> (6).** A solution of [W(≡CSn<sup>n</sup>Bu<sub>3</sub>)(CO)<sub>2</sub>(Tp\*)] (400 mg, 0.477 mmol), 1-bromonaphthalene (80 μL, 0.57 mmol), [Pd(PPh<sub>3</sub>)<sub>4</sub>] (55 mg, 0.048 mmol) and [AuCl(SMe<sub>2</sub>)] (14 mg, 0.048 mmol) in toluene (30 mL) was heated under reflux for 18 h. After this time, the solvent was removed under reduced pressure and the residue was subjected to column chromatography (40 x 3 cm silica gel column), eluting initially with petroleum spirits (40–60 °C) followed by 10% v/v CH<sub>2</sub>Cl<sub>2</sub>/petrol. A red band was collected and the volatiles were removed under reduced pressure to give **6** as an orange-red solid (210 mg, 0.311 mmol, 65% based on **1**). IR (CH<sub>2</sub>Cl<sub>2</sub>, cm<sup>-1</sup>): 1973s, 1882s *v*<sub>CO</sub>. UV-Vis (CH<sub>2</sub>Cl<sub>2</sub>): λ<sub>max</sub> = 492 (ε = 35 L<sup>-1</sup>mol<sup>-1</sup>cm<sup>-1</sup>). <sup>1</sup>H NMR (700 MHz, CDCl<sub>3</sub>, 25 °C): δ<sub>H</sub> = 2.41 (s, 6H, pzCH<sub>3</sub>), 2.41 (s, 3H, pzCH<sub>3</sub>), 2.47 (s, 6H, pzCH<sub>3</sub>), 2.55 (s, 3H, pzCH<sub>3</sub>), 5.85 (s, 1H, pzCH), 5.92 (s, 2H, pzCH), 7.41–7.48 (m, 3H, C<sub>10</sub>H<sub>7</sub>), 7.71 (d, <sup>3</sup>J<sub>HH</sub> = 7.3 Hz, 1H, C<sub>10</sub>H<sub>7</sub>), 7.86 (d, <sup>3</sup>J<sub>HH</sub> = 8.0 Hz, 2H, C<sub>10</sub>H<sub>7</sub>), 8.59 (d, <sup>3</sup>J<sub>HH</sub> = 8.0 Hz, 1H, C<sub>10</sub>H<sub>7</sub>). <sup>13</sup>C{<sup>1</sup>H} NMR (176 MHz, CDCl<sub>3</sub>, 25 °C): δ<sub>c</sub> = 12.7, 12.9, 15.4, 16.4 (pzCH<sub>3</sub>), 106.5, 106.8 (pzCH), 125.6, 126.1, 126.2, 126.8, 127.8, 128.3, 130.8, 133.0, 133.5 (C<sub>10</sub>H<sub>7</sub>), 144.6, 145.2 (pzCCH<sub>3</sub>), 146.2 (W≡CC, <sup>2</sup>J<sub>CW</sub> = 42), 152.2, 152.5 (pzCCH<sub>3</sub>), 224.6 (CO, <sup>1</sup>J<sub>CW</sub> = 166), 278.9 (W≡C, <sup>1</sup>J<sub>CW</sub> = 189). MS (ESI, *m/z*): Found: 677.20227. Calcd for C<sub>28</sub>H<sub>30</sub><sup>11</sup>BN<sub>6</sub>O<sub>2</sub><sup>184</sup>W [M+H]<sup>+</sup>: 677.20271. Anal. Found: C, 49.65; H, 4.45; N, 12.34. Calcd for C<sub>28</sub>H<sub>29</sub>BN<sub>6</sub>O<sub>2</sub>W: C, 49.73; H, 4.32; N, 12.43%.

A crystal suitable for structure determination was grown by slow evaporation of a CH<sub>2</sub>Cl<sub>2</sub>/ethanol solution. *Crystal data* for C<sub>28</sub>H<sub>29</sub>BN<sub>6</sub>O<sub>2</sub>W (*M* = 676.23 g/mol): monoclinic, space group P2<sub>1</sub>/c (no. 14), *a* = 7.95010(10) Å, *b* = 17.9153(3) Å, *c* = 19.4550(2) Å, β = 100.4370(10)°, *V* = 2725.10(6) Å<sup>3</sup>, *Z* = 4, *T* = 150.0(1) K, μ(CuKα) = 8.150 mm<sup>-1</sup>, *D*<sub>calc</sub> = 1.648 g/cm<sup>3</sup>, 8551 reflections measured (9.244° ≤ 2θ ≤ 141.868°), 5082 unique (*R*<sub>int</sub> = 0.0183, *R*<sub>sigma</sub> = 0.0292) which were used in all calculations. The final *R*<sub>1</sub> was 0.0294 (*I* > 2σ(*I*)) and *wR*<sub>2</sub> was 0.0765 (all data) for 353 refined parameters with 0 restraints. CCDC 1963670.

**[2-{(Tp\*)}(CO)<sub>2</sub>W≡C]C<sub>10</sub>H<sub>7</sub> (7).** A solution of [W(≡CSn<sup>n</sup>Bu<sub>3</sub>)(CO)<sub>2</sub>(Tp\*)] (295 mg, 0.351 mmol), 2-bromonaphthalene (75 mg, 0.36 mmol), [Pd(PPh<sub>3</sub>)<sub>4</sub>] (41 mg, 0.035 mmol) and [AuCl(SMe<sub>2</sub>)] (10 mg, 0.034 mmol) in toluene (20 mL) was heated under reflux for 16 h. After this time, the solvent was removed under reduced pressure and the residue was subjected to column chromatography (25 x 3 cm silica gel column), eluting initially with petroleum spirits (40–60 °C) followed by 20% v/v dichloromethane/petrol. A red band was collected and the volatiles were removed under reduced pressure to give an orange-red solid of pure **7** (165 mg, 0.244 mmol, 70% based on **1**). IR (CH<sub>2</sub>Cl<sub>2</sub>, cm<sup>-1</sup>): 1973s, 1882s *v*<sub>CO</sub>. UV-Vis (CH<sub>2</sub>Cl<sub>2</sub>): λ<sub>max</sub> = 495 (ε = 262 L<sup>-1</sup>mol<sup>-1</sup>cm<sup>-1</sup>). <sup>1</sup>H NMR (700 MHz, CDCl<sub>3</sub>, 25 °C): δ<sub>H</sub> = 2.36 (s, 3H, pzCH<sub>3</sub>), 2.40 (s, 6H, pzCH<sub>3</sub>), 2.49 (s, 3H, pzCH<sub>3</sub>), 2.53 (s, 6H, pzCH<sub>3</sub>), 5.80 (s, 1H, pzCH), 5.91 (s, 2H, pzCH), 7.43–7.49 (m, 2H, C<sub>10</sub>H<sub>7</sub>), 7.53 (dd, <sup>3</sup>J<sub>HH</sub> = 8.4 Hz, <sup>4</sup>J<sub>HH</sub> = 1.6 Hz, 1H, C<sub>10</sub>H<sub>7</sub>), 7.72 (d, <sup>3</sup>J<sub>HH</sub> = 8.4 Hz, 1H, C<sub>10</sub>H<sub>7</sub>), 7.76 (d, <sup>3</sup>J<sub>HH</sub> = 7.6 Hz, 1H, C<sub>10</sub>H<sub>7</sub>), 7.80 (d, <sup>3</sup>J<sub>HH</sub> = 7.9 Hz, 1H, C<sub>10</sub>H<sub>7</sub>), 7.92 (s, 1H, C<sub>10</sub>H<sub>7</sub>). <sup>13</sup>C{<sup>1</sup>H} NMR (176 MHz, CDCl<sub>3</sub>, 25 °C): δ<sub>c</sub> = 12.8, 12.8, 15.4, 16.7 (pzCH<sub>3</sub>), 106.6, 106.8 (pzCH), 126.5, 126.6, 126.7, 127.7, 128.0, 128.2, 128.9, 132.5, 133.1 (C<sub>10</sub>H<sub>7</sub>), 144.6, 145.2 (pzCCH<sub>3</sub>), 147.9 (W≡CC, <sup>2</sup>J<sub>CW</sub> = 43), 152.2, 152.5 (pzCCH<sub>3</sub>), 224.3 (CO, <sup>1</sup>J<sub>CW</sub> = 165), 278.7 (W≡C, <sup>1</sup>J<sub>CW</sub> = 187). MS (ESI, *m/z*): Found: 676.1947. Calcd for C<sub>28</sub>H<sub>29</sub><sup>11</sup>BN<sub>6</sub>O<sub>2</sub><sup>184</sup>W [M-e]<sup>+</sup>: 676.1954. Anal. Found: C, 49.66; H, 4.43; N, 12.32. Calcd for C<sub>28</sub>H<sub>29</sub>BN<sub>6</sub>O<sub>2</sub>W: C, 49.73; H, 4.32; N, 12.43%.

A crystal suitable for structure determination was grown by slow evaporation of a CH<sub>2</sub>Cl<sub>2</sub>/acetonitrile solution. *Crystal data* for C<sub>28</sub>H<sub>29</sub>BN<sub>6</sub>O<sub>2</sub>W (*M* = 676.23 g.mol<sup>-1</sup>): monoclinic, space group P2<sub>1</sub>/n (no. 14), *a* = 7.9431(4), *b* = 17.7548(8), *c* = 19.9617(9) Å, β = 99.821(4)°, *V* = 2773.9(2) Å<sup>3</sup>, *Z* = 4, *T* = 150.0(1) K, μ(CuKα) = 8.007 mm<sup>-1</sup>, *D*<sub>calc</sub> = 1.619 g.cm<sup>-3</sup>, 7988 reflections measured (8.992° ≤ 2θ ≤ 133.182°), 4854 unique (*R*<sub>int</sub> = 0.0255, *R*<sub>sigma</sub> = 0.0446) which were used in all calculations. The final *R*<sub>1</sub> was 0.0589 (*I* > 2σ(*I*)) and *wR*<sub>2</sub> was 0.1476 (all data) for 353 refined parameters with 0 restraints. CCDC 1963671.

**[9-{(Tp\*)}(CO)<sub>2</sub>W≡C]C<sub>14</sub>H<sub>9</sub> (8).** A solution of [W(≡CSn<sup>n</sup>Bu<sub>3</sub>)(CO)<sub>2</sub>(Tp\*)] (400 mg, 0.477 mmol), 9-bromophenanthrene (129 mg, 0.502 mmol), [Pd(PPh<sub>3</sub>)<sub>4</sub>] (55 mg, 0.048 mmol) and [AuCl(SMe<sub>2</sub>)] (14 mg, 0.048 mmol) in toluene (30 mL) was heated under reflux for 18 h. After this time, the solvent was removed under reduced pressure and the residue was subjected to column chromatography (25 x 3 cm silica gel column), eluting initially with petroleum spirits (40–60 °C) followed by 25% v/v CH<sub>2</sub>Cl<sub>2</sub>/petrol. A red band was collected and the volatiles were removed under reduced pressure to give **8**-(CH<sub>2</sub>Cl<sub>2</sub>)<sub>0.5</sub> as a red solid (310 mg, 0.403 mmol, 85% based on **1**). IR (CH<sub>2</sub>Cl<sub>2</sub>, cm<sup>-1</sup>): 1973s, 1883s *v*<sub>CO</sub>. UV-Vis (CH<sub>2</sub>Cl<sub>2</sub>): λ<sub>max</sub> = 498 (ε = 28 L<sup>-1</sup>mol<sup>-1</sup>cm<sup>-1</sup>). <sup>1</sup>H NMR (600 MHz, CDCl<sub>3</sub>, 25 °C): δ<sub>H</sub> = 2.38 (s, 6H, pzCH<sub>3</sub>), 2.38 (s, 3H, pzCH<sub>3</sub>), 2.44 (s, 6H, pzCH<sub>3</sub>), 2.53 (s, 3H, pzCH<sub>3</sub>), 5.82 (s, 1H, pzCH), 5.90 (s, 2H, pzCH), 7.51 (t', <sup>3</sup>J<sub>HH</sub> = 7.8, 1H, C<sub>14</sub>H<sub>9</sub>), 7.57 (t', <sup>3</sup>J<sub>HH</sub> = 7.4, 1H, C<sub>14</sub>H<sub>9</sub>), 7.60 (t', <sup>3</sup>J<sub>HH</sub> = 7.4, 1H, C<sub>14</sub>H<sub>9</sub>), 7.66 (t', <sup>3</sup>J<sub>HH</sub> = 7.7, 1H, C<sub>14</sub>H<sub>9</sub>), 7.92 (d, <sup>3</sup>J<sub>HH</sub> = 7.9 Hz, 1H, C<sub>14</sub>H<sub>9</sub>), 7.95 (s, 1H, C<sub>14</sub>H<sub>9</sub>), 8.58 (d, <sup>3</sup>J<sub>HH</sub> = 8.3, 1H, C<sub>14</sub>H<sub>9</sub>), 8.66 (d, <sup>3</sup>J<sub>HH</sub> = 8.3, 2H, C<sub>14</sub>H<sub>9</sub>). <sup>13</sup>C{<sup>1</sup>H} NMR (151 MHz, CDCl<sub>3</sub>, 25 °C): δ<sub>c</sub> = 12.8, 12.9, 15.5, 16.4 (pzCH<sub>3</sub>), 106.6, 106.8

(pzCH), 122.7, 122.8, 126.8, 126.8, 127.1, 127.1, 127.3, 129.0, 130.0, 130.2, 131.3, 131.9, 132.1 (C<sub>14</sub>H<sub>9</sub>), 144.5 (W≡CC, <sup>2</sup>J<sub>CW</sub> = 40), 144.6, 145.2, 152.3, 152.5 (pzCCH<sub>3</sub>), 224.7 (CO, <sup>1</sup>J<sub>CW</sub> = 166), 278.8 (W≡C, <sup>1</sup>J<sub>CW</sub> = 188). MS (ESI, *m/z*): Found: 727.21706. Calcd for C<sub>32</sub>H<sub>32</sub><sup>11</sup>BN<sub>6</sub>O<sub>2</sub><sup>184</sup>W [M+H]<sup>+</sup>: 727.21836. Anal. Found: C, 50.70; H, 4.41; N, 10.17. Calcd for C<sub>32</sub>H<sub>31</sub>BN<sub>6</sub>O<sub>2</sub>W·(CH<sub>2</sub>Cl<sub>2</sub>)<sub>0.5</sub>: C, 50.78; H, 4.20; N, 10.93%. <sup>1</sup>H NMR spectroscopy indicated the presence of ca. 0.5 equivalents of CH<sub>2</sub>Cl<sub>2</sub> of solvation was present in the sample used for elemental analysis.

Crystals suitable for structure determination were grown by slow evaporation of a CH<sub>2</sub>Cl<sub>2</sub>/methanol solution at 4 °C and was found to be a dichloromethane hemisolvate. *Crystal data for* C<sub>32.5</sub>H<sub>32</sub>BCIN<sub>6</sub>O<sub>2</sub>W (*M* = 768.75 g·mol<sup>-1</sup>): monoclinic, space group I2/a (no. 15), *a* = 37.5930(3), *b* = 10.45550(10), *c* = 32.1962(3) Å, *β* = 96.4830(10)°, *V* = 12573.9(2) Å<sup>3</sup>, *Z* = 16, *T* = 150.0(1) K, *μ*(CuKα) = 7.911 mm<sup>-1</sup>, *D*<sub>calc</sub> = 1.624 g·cm<sup>-3</sup>, 32434 reflections measured (7.672° ≤ 2θ ≤ 133.196°), 11119 unique (*R*<sub>int</sub> = 0.0276, *R*<sub>sigma</sub> = 0.0286) which were used in all calculations. The final *R*<sub>1</sub> was 0.0295 (*I* > 2σ(*I*)) and *wR*<sub>2</sub> was 0.0732 (all data) for 804 refined parameters with 0 restraints. CCDC 1963673.

**[9-{(Tp\*)(CO)<sub>2</sub>W≡C}C<sub>14</sub>H<sub>9</sub>] (9).** A solution of [W(≡CSn<sup>n</sup>Bu<sub>3</sub>)(CO)<sub>2</sub>(Tp\*)] (400 mg, 0.477 mmol), 9-bromoanthracene (125 mg, 0.486 mmol), [Pd(PPh<sub>3</sub>)<sub>4</sub>] (55 mg, 0.048 mmol) and [AuCl(SMe<sub>2</sub>)] (14 mg, 0.048 mmol) in toluene (20 mL) was heated under reflux for 16 h. After this time, the solvent was removed under reduced pressure and the residue was subjected to column chromatography (25 x 3 cm silica gel column), eluting initially with petroleum spirits (40–60 °C) followed by 25% v/v CH<sub>2</sub>Cl<sub>2</sub>/petrol. A yellow-green band was collected and the volatiles were removed under reduced pressure to give **9**·(CH<sub>2</sub>Cl<sub>2</sub>)<sub>0.33</sub> as a yellow-green solid (133 mg, 0.176 mmol, 37% based on **1**). IR (CH<sub>2</sub>Cl<sub>2</sub>, cm<sup>-1</sup>): 1973s, 1884s *v*<sub>CO</sub>. UV-Vis (CH<sub>2</sub>Cl<sub>2</sub>): λ<sub>max</sub> = 418 (ε = 2895 L<sup>-1</sup>mol<sup>-1</sup>cm<sup>-1</sup>), 443 (ε = 6089 L<sup>-1</sup>mol<sup>-1</sup>cm<sup>-1</sup>), 470 (ε = 7408 L<sup>-1</sup>mol<sup>-1</sup>cm<sup>-1</sup>). <sup>1</sup>H NMR (700 MHz, CDCl<sub>3</sub>, 25 °C): δ<sub>H</sub> = 2.25 (s, 6H, pzCH<sub>3</sub>), 2.40 (s, 3H, pzCH<sub>3</sub>), 2.47 (s, 6H, pzCH<sub>3</sub>), 2.56 (s, 3H, pzCH<sub>3</sub>), 5.83 (s, 1H, pzCH), 5.86 (s, 2H, pzCH), 7.40 (br, 2H, C<sub>14</sub>H<sub>9</sub>), 7.36–7.53 (br, 2H, C<sub>14</sub>H<sub>9</sub>), 8.50 (s, 1H, C<sub>14</sub>H<sub>9</sub>), 8.64–9.00 (br, 2H, C<sub>14</sub>H<sub>9</sub>). <sup>1</sup>H NMR (700 MHz, CDCl<sub>3</sub>, -50 °C): δ<sub>H</sub> = 2.21 (s, 6H, pzCH<sub>3</sub>), 2.38 (s, 3H, pzCH<sub>3</sub>), 2.45 (s, 6H, pzCH<sub>3</sub>), 2.55 (s, 3H, pzCH<sub>3</sub>), 5.84 (s, 1H, pzCH), 5.86 (s, 2H, pzCH), 7.23 (t', <sup>3</sup>J<sub>HH</sub> = 7.3, 1H, C<sub>14</sub>H<sub>9</sub>), 7.34 (t', <sup>3</sup>J<sub>HH</sub> = 7.3, 1H, C<sub>14</sub>H<sub>9</sub>), 7.51 (t', <sup>3</sup>J<sub>HH</sub> = 7.3, 1H, C<sub>14</sub>H<sub>9</sub>), 7.76 (t', <sup>3</sup>J<sub>HH</sub> = 7.3, 1H, C<sub>14</sub>H<sub>9</sub>), 7.98 (d, <sup>3</sup>J<sub>HH</sub> = 7.8, 1H, C<sub>14</sub>H<sub>9</sub>), 8.05 (d, <sup>3</sup>J<sub>HH</sub> = 8.0, 1H, C<sub>14</sub>H<sub>9</sub>), 8.43 (d, <sup>3</sup>J<sub>HH</sub> = 8.0, 1H, C<sub>14</sub>H<sub>9</sub>), 8.54 (s, 1H, C<sub>14</sub>H<sub>9</sub>), 9.17 (d, <sup>3</sup>J<sub>HH</sub> = 8.0, 1H, C<sub>14</sub>H<sub>9</sub>). <sup>13</sup>C{<sup>1</sup>H} NMR (176 MHz, CDCl<sub>3</sub>, -50 °C): δ<sub>C</sub> = 12.9, 13.2, 15.6, 16.2 (pzCH<sub>3</sub>), 106.2, 106.7 (pzCH), 125.4, 125.8, 126.0, 126.9, 127.0 (2C), 127.5, 128.8, 128.9, 131.0, 131.1, 131.5, 134.2 (C<sub>14</sub>H<sub>9</sub>), 140.4 (W≡CC), 144.5, 145.2 (pzCCH<sub>3</sub>), 152.0, 152.2 (pzCCH<sub>3</sub>), 227.0 (CO), 280.1 (W≡C). MS (ESI, *m/z*): Found: 727.21805. Calcd for C<sub>32</sub>H<sub>32</sub><sup>11</sup>BN<sub>6</sub>O<sub>2</sub><sup>184</sup>W [M+H]<sup>+</sup>: 727.21836. Anal. Found: C, 51.43; H, 4.12; N, 11.06. Calcd for C<sub>32</sub>H<sub>31</sub>BN<sub>6</sub>O<sub>2</sub>W·(CH<sub>2</sub>Cl<sub>2</sub>)<sub>0.33</sub>: C, 51.46; H, 4.23; N, 11.14%. <sup>1</sup>H NMR spectroscopy indicated the presence of ca. 0.33 equivalents of CH<sub>2</sub>Cl<sub>2</sub> of solvation was present in the sample used for elemental analysis.

Crystals suitable for structure determination were grown by slow evaporation of a CH<sub>2</sub>Cl<sub>2</sub>/acetonitrile solution at 4 °C and was found to be an acetonitrile solvate. *Crystal data for* C<sub>34</sub>H<sub>34</sub>BN<sub>7</sub>O<sub>2</sub>W (*M* = 767.34 g·mol<sup>-1</sup>): monoclinic, space group P2<sub>1</sub>/n (no. 14), *a* = 10.2667(4), *b* = 23.1598(12), *c* = 13.5771(6) Å, *β* = 92.406(4)°, *V* = 3225.4(3) Å<sup>3</sup>, *Z* = 4, *T* = 150.0(1) K, *μ*(MoKα) = 3.624 mm<sup>-1</sup>, *D*<sub>calc</sub> = 1.580 g·cm<sup>-3</sup>, 15366 reflections measured (6.962° ≤ 2θ ≤ 50.052°), 5678 unique (*R*<sub>int</sub> = 0.0290, *R*<sub>sigma</sub> = 0.0386) which were used in all calculations. The final *R*<sub>1</sub> was 0.0432 (*I* > 2σ(*I*)) and *wR*<sub>2</sub> was 0.0802 (all data) for 417 refined parameters with 36 restraints. CCDC 1963672.

**[9,10-{(Tp\*)(CO)<sub>2</sub>W≡C}C<sub>14</sub>H<sub>8</sub>] (10).** A solution of [W(≡CSn<sup>n</sup>Bu<sub>3</sub>)(CO)<sub>2</sub>(Tp\*)] (630 mg, 0.751 mmol), 9,10-dibromoanthracene (121 mg, 0.360 mmol), [Pd(PPh<sub>3</sub>)<sub>4</sub>] (83 mg, 0.072 mmol) and [AuCl(SMe<sub>2</sub>)] (23 mg, 0.078 mmol) in toluene (30 mL) was heated under reflux for 17 h. After this time, the solvent was removed under reduced pressure and the residue was subjected to column chromatography (25 x 3 cm silica gel column), eluting initially with petroleum spirits (40–60 °C), followed thereafter by CH<sub>2</sub>Cl<sub>2</sub>, and finally with CHCl<sub>3</sub>. A red-purple band was collected and the volatiles were removed under reduced pressure to give **10**·2.5(CHCl<sub>3</sub>) as a dark red-purple solid (50 mg, 0.032 mmol, 9% based on **1**). IR (CH<sub>2</sub>Cl<sub>2</sub>, cm<sup>-1</sup>): 1972s, 1887s *v*<sub>CO</sub>. UV-Vis (CH<sub>2</sub>Cl<sub>2</sub>): λ<sub>max</sub> = 492 (ε = 14500 L<sup>-1</sup>mol<sup>-1</sup>cm<sup>-1</sup>), 525 (ε = 16700 L<sup>-1</sup>mol<sup>-1</sup>cm<sup>-1</sup>), 565 (ε = 14100 L<sup>-1</sup>mol<sup>-1</sup>cm<sup>-1</sup>). <sup>1</sup>H NMR (700 MHz, CDCl<sub>3</sub>, 25 °C): δ<sub>H</sub> = 2.25 (s, 12H, pzCH<sub>3</sub>), 2.39 (s, 6H, pzCH<sub>3</sub>), 2.47 (s, 12H, pzCH<sub>3</sub>), 2.53 (s, 6H, pzCH<sub>3</sub>), 5.82 (s, 2H, pzCH), 5.85 (s, 4H, pzCH), 7.20–9.20 (br m, 8H, C<sub>14</sub>H<sub>8</sub>). <sup>1</sup>H NMR (700 MHz, CDCl<sub>3</sub>, -50 °C): δ<sub>H</sub> = 2.20 (s, 6H, pzCH<sub>3</sub>), 2.23 (s, 6H, pzCH<sub>3</sub>), 2.39 (s, 6H, pzCH<sub>3</sub>), 2.46 (s, 12H, pzCH<sub>3</sub>), 2.52 (s, 6H, pzCH<sub>3</sub>), 5.84 (s, 4H, pzCH), 5.87 (s, 2H, pzCH), 7.06 (br, 1H, C<sub>14</sub>H<sub>8</sub>), 7.51 (br, 1H, C<sub>14</sub>H<sub>8</sub>), 7.59 (br, 1H, C<sub>14</sub>H<sub>8</sub>), 7.81 (br, 1H, C<sub>14</sub>H<sub>8</sub>), 8.42 (br, 1H, C<sub>14</sub>H<sub>8</sub>), 8.49 (br, 1H, C<sub>14</sub>H<sub>8</sub>), 9.14 (br, 1H, C<sub>14</sub>H<sub>8</sub>), 9.27 (br, 1H, C<sub>14</sub>H<sub>8</sub>). <sup>13</sup>C{<sup>1</sup>H} NMR (176 MHz, CDCl<sub>3</sub>, 25 °C): δ<sub>C</sub> = 12.9, 13.2, 15.6, 16.3 (pzCH<sub>3</sub>), 106.2, 106.7 (pzCH), 126.6, 127.1, 127.4, 130.3, 132.8 (C<sub>14</sub>H<sub>8</sub>), 144.5, 145.3, 152.0, 152.2 (pzCCH<sub>3</sub>). Poor solubility in all common organic solvents, including CDCl<sub>3</sub>, and broadening of signals prevented unequivocal assignment of the remaining carbon resonances. MS (ESI, *m/z*): Found: 1274.3453. Calcd for C<sub>50</sub>H<sub>52</sub><sup>11</sup>B<sub>2</sub>N<sub>12</sub>O<sub>4</sub><sup>184</sup>W<sub>2</sub> [M-e]<sup>+</sup>: 1274.3463. Anal. Found: C, 40.12; H, 4.12; N, 10.13%. Calcd for C<sub>50</sub>H<sub>52</sub>B<sub>2</sub>N<sub>12</sub>O<sub>4</sub>W<sub>2</sub>·2.5(CHCl<sub>3</sub>): C, 40.09; H, 3.49; N, 10.69%.

A crystal suitable for structure determination was grown by slow evaporation of a CHCl<sub>3</sub>/cyclohexane solution at 4 °C. *Crystal data for* C<sub>50</sub>H<sub>52</sub>B<sub>2</sub>N<sub>12</sub>O<sub>4</sub>W<sub>2</sub> (*M* = 1274.35 g·mol<sup>-1</sup>): monoclinic, space group P2<sub>1</sub>/c (no. 14), *a* = 13.8341(4), *b* = 10.1106(3), *c* = 20.5773(6) Å, *β* = 106.771(3)°, *V* = 2755.75(15) Å<sup>3</sup>, *Z* = 2, *T* = 150.0(1) K, *μ*(CuKα) = 8.020 mm<sup>-1</sup>, *D*<sub>calc</sub> = 1.536 g·cm<sup>-3</sup>, 9063 reflections measured (8.976° ≤ 2θ ≤ 141.718°), 5147 unique (*R*<sub>int</sub> = 0.0361, *R*<sub>sigma</sub> = 0.0606) which were used in all calculations. The final *R*<sub>1</sub> was 0.0350 (*I* > 2σ(*I*)) and *wR*<sub>2</sub> was 0.0850 (all data) for 326 refined parameters with 0 restraints. CCDC 1963674.

**[1,3,6,8-{(Tp\*)(CO)<sub>2</sub>W≡C}C<sub>16</sub>H<sub>6</sub>] (11).** A solution of [W(≡CSn<sup>n</sup>Bu<sub>3</sub>)(CO)<sub>2</sub>(Tp\*)] (750 mg, 0.894 mmol), 1,3,6,8-

tetrabromopyrene (90 mg, 0.174 mmol), [Pd(PPh<sub>3</sub>)<sub>4</sub>] (80 mg, 0.070 mmol) and [AuCl(SMe<sub>2</sub>)] (21 mg, 0.070 mmol) in toluene (30 mL) was heated under reflux for 21 h. After this time, the solvent was removed under reduced pressure and the residue was subjected to column chromatography (35 x 3 cm silica gel column), eluting initially with petroleum spirits (40–60 °C) followed by 50% v/v CH<sub>2</sub>Cl<sub>2</sub>/petrol. A purple band was collected and the volatiles were removed under reduced pressure to give **11** as a dark purple solid (118 mg, 0.049 mmol, 28% based on **1**). IR (CH<sub>2</sub>Cl<sub>2</sub>, cm<sup>-1</sup>): 1975s, 1889s ν<sub>CO</sub>. UV-Vis (CH<sub>2</sub>Cl<sub>2</sub>): λ<sub>max</sub> = 407 (ε = 27900 L<sup>-1</sup>mol<sup>-1</sup>cm<sup>-1</sup>), 530 (ε = 13600 L<sup>-1</sup>mol<sup>-1</sup>cm<sup>-1</sup>), 568 (ε = 21500 L<sup>-1</sup>mol<sup>-1</sup>cm<sup>-1</sup>). <sup>1</sup>H NMR (600 MHz, CDCl<sub>3</sub>, 25 °C): δ<sub>H</sub> = 2.36 (s, 24H, pzCH<sub>3</sub>), 2.37 (s, 12H, pzCH<sub>3</sub>), 2.42 (s, 24H, pzCH<sub>3</sub>), 2.54 (s, 12H, pzCH<sub>3</sub>), 5.81 (s, 4H, pzCH), 5.87 (s, 8H, pzCH), 8.03 (s, 2H, C<sub>16</sub>H<sub>6</sub>), 8.53 (s, 4H, C<sub>16</sub>H<sub>6</sub>). <sup>13</sup>C{<sup>1</sup>H} NMR (151 MHz, CDCl<sub>3</sub>, 25 °C): δ<sub>C</sub> = 12.8, 12.9, 15.7, 16.5 (pzCH<sub>3</sub>), 106.7 (pzCH), 124.6, 126.7, 131.1, 133.2 (C<sub>16</sub>H<sub>6</sub>), 143.3 (W≡CC), 144.5, 145.1 (pzCCH<sub>3</sub>), 152.3, 152.7 (pzCCH<sub>3</sub>), 224.1 (CO), 278.0 (W≡C). MS (ESI, *m/z*): Found: 2395.61710. Calcd for C<sub>88</sub>H<sub>95</sub><sup>11</sup>B<sub>4</sub>N<sub>24</sub>O<sub>8</sub><sup>184</sup>W<sub>4</sub> [M+H]<sup>+</sup>: 2395.62434. Anal. Found: C, 44.04; H, 3.98; N, 13.99. Calcd for C<sub>88</sub>H<sub>94</sub>B<sub>4</sub>N<sub>24</sub>O<sub>8</sub>W<sub>4</sub>: C, 44.14; H, 3.96; N, 14.04%.

Crystals suitable for structure determination were grown by slow evaporation of a CH<sub>2</sub>Cl<sub>2</sub>/cyclohexane solution at 4 °C and was found to be a cyclohexane pentasolvate, although two of these were found to be highly disordered and were removed from the refinement using the solvent mask implementation in Olex<sup>2</sup>.<sup>8</sup> These are not included in the molecular weight calculations. *Crystal data* for C<sub>106</sub>H<sub>130</sub>B<sub>4</sub>N<sub>24</sub>O<sub>8</sub>W<sub>4</sub> (*M* = 2646.97 g.mol<sup>-1</sup>): monoclinic, space group I2/m (no. 12), *a* = 23.8078(8), *b* = 25.2600(6), *c* = 25.4589(9) Å, β = 114.840(4)°, *V* = 13894.1(9) Å<sup>3</sup>, *Z* = 4, *T* = 150.0(1) K, μ(CuKα) = 6.379 mm<sup>-1</sup>, *D*<sub>calc</sub> = 1.265 g.cm<sup>-3</sup>, 36913 reflections measured (7.654° ≤ 2θ ≤ 141.49°), 13503 unique (*R*<sub>int</sub> = 0.0293, *R*<sub>sigma</sub> = 0.0321) which were used in all calculations. The final *R*<sub>1</sub> was 0.0523 (*I* > 2σ(*I*)) and *wR*<sub>2</sub> was 0.1497 (all data) for 687 refined parameters with 0 restraints. CCDC 1963675.

### Selected crystallographic data

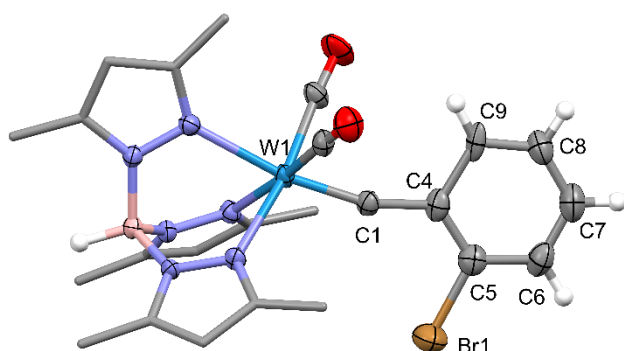

**Figure S1.** Molecular structure of **2** in a crystal of 2-CH<sub>2</sub>Cl<sub>2</sub> showing 50% displacement ellipsoids. Pyrazolyl groups are simplified and solvent is not shown for clarity. Selected distances [Å] and angles [°]: W1–C1 1.826(6), C1–C4 1.440(8), C5–Br1 1.872(7), W1–C1 C4 162.6(5).

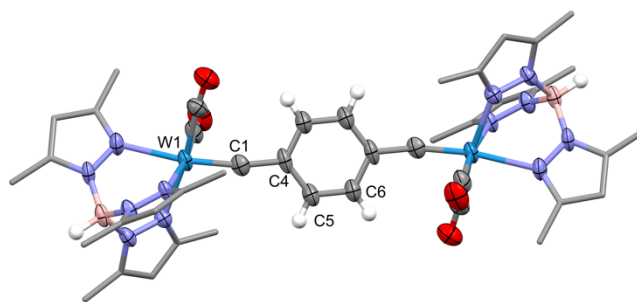

**Figure S2.** Molecular structure of **4** in a crystal of 4-5C<sub>6</sub>H<sub>12</sub> showing 50% displacement ellipsoids. Only one-half of the molecule is unique with a crystallographic mirror plane present through the benzene ring. Pyrazolyl groups are simplified and solvent is not shown for clarity. Selected distances [Å] and angles [°]: W1–C1 1.799(6), C1–C4 1.462(8), W1–C1–C4 169.2(6).

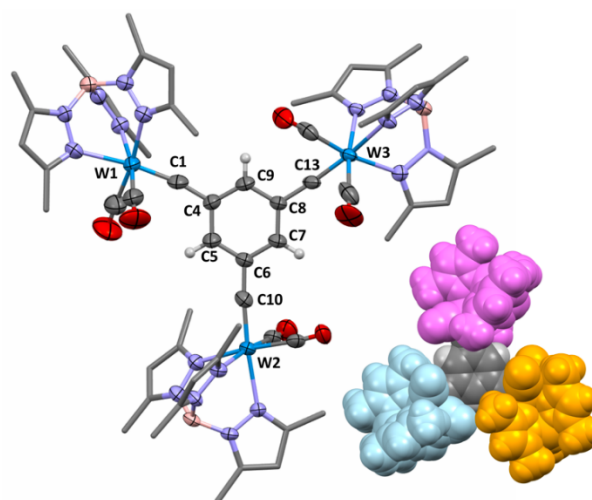

**Figure S3.** Molecular structure of **5** in a crystal (50% displacement ellipsoids, pyrazolyl groups simplified and most hydrogen atoms omitted for clarity). Selected distances [Å] and angles [°]: W1–C1 1.832(9), C1–C4 1.455(11), W2–C10 1.822(8), C10–C6 1.450(11), W3–C13 1.822(8), C13–C8 1.458(10), W1–C1–C4 166.7(8), W2–C10–C6 174.3(7), W3–C13–C8 164.9(6). Inset: space-filling representation with each 'W(=C)(CO)<sub>2</sub>(Tp\*)' group distinctly coloured.

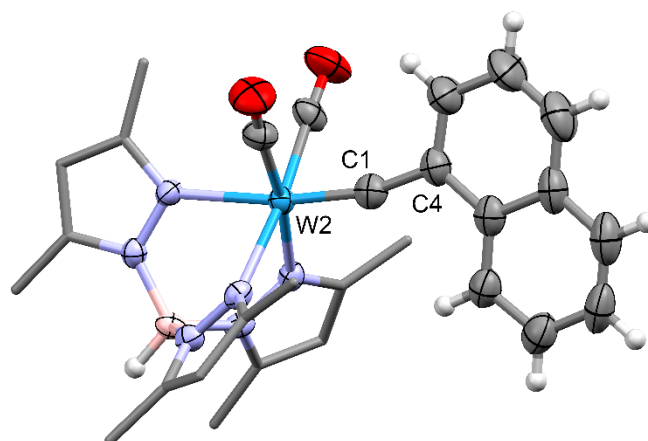

**Figure S4.** Molecular structure of **6** showing 50% displacement ellipsoids. Pyrazolyl groups are simplified for clarity. Selected distances [Å] and angles [°]: W1–C1 1.823(4), C1–C4 1.445(6), W1–C1–C4 165.9(4).

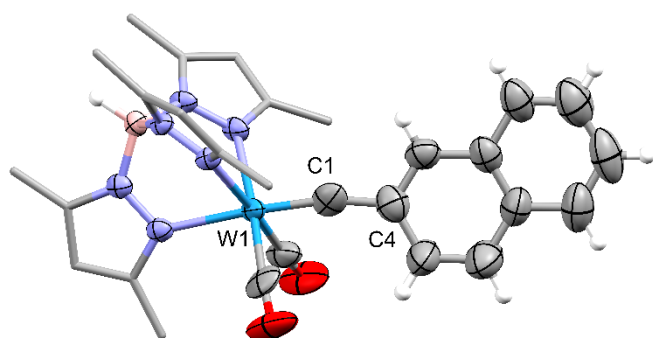

**Figure S5.** Molecular structure of **7** showing 50% displacement ellipsoids. Pyrazolyl groups are simplified for clarity. Selected distances [Å] and angles [°]: W1–C1 1.817(13), C1–C4 1.455(18), W1–C1–C4 166.9(11).

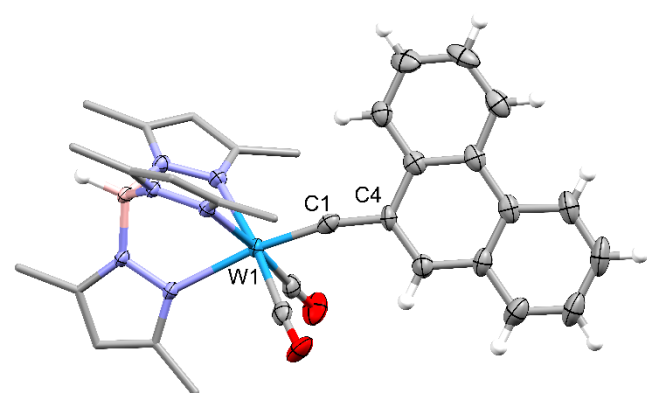

**Figure S6.** Molecular structure of **8** in a crystal of  $8 \cdot \frac{1}{2} \text{CH}_2\text{Cl}_2$  showing 50% displacement ellipsoids (one of two crystallographically independent molecules). Pyrazolyl groups are simplified and solvent is not shown for clarity. Selected distances [Å] and angles [°]: W1–C1 1.825(4), C1–C4 1.437(5), W1–C1–C4 167.0(3); W2–C34 1.816(4), C34–C37 1.445(5), W2–C34–C37 172.2(3).

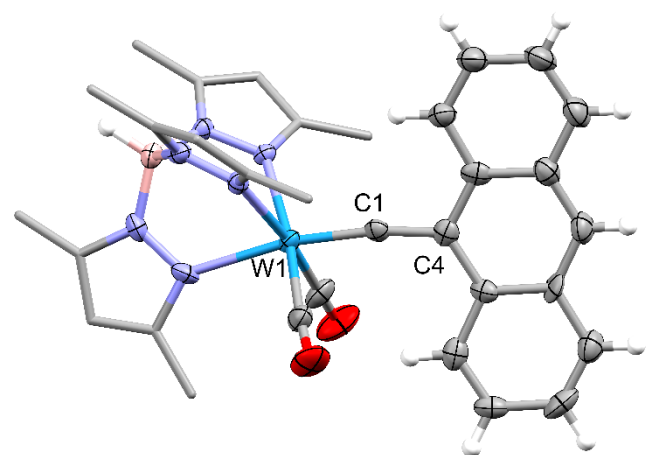

**Figure S7.** Molecular structure of **9** in a crystal of  $9 \cdot \text{CH}_3\text{CN}$  showing 50% displacement ellipsoids. Pyrazolyl groups are simplified and solvent is not shown for clarity. Selected distances [Å] and angles [°]: W1–C1 1.834(6), C1–C4 1.433(8), W1–C1–C4 171.1(5).

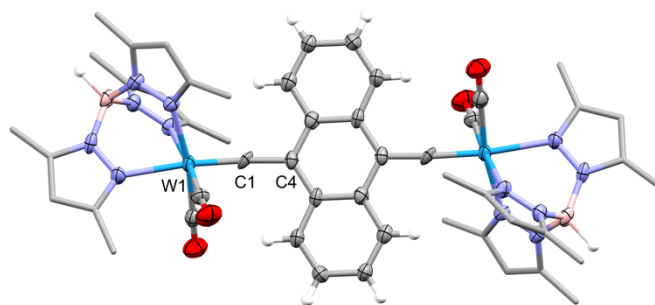

**Figure S8.** Molecular structure of **10** showing 50% displacement ellipsoids. Only one-half of the molecule is crystallographically unique with a crystallographic mirror plane orthogonal to the anthracene plane and running through the centre of all three anthracene rings. Pyrazolyl groups are simplified for clarity. Selected distances [Å] and angles [°]: W1–C1 1.792(5), C1–C4 1.466(7), W1–C1–C4 176.6(4).

### Comments on the stability, optical and electronic properties of complexes **2–11**

All the compounds reported herein are stable to air and moisture for at least one week in  $\text{CDCl}_3$  solutions (monitored by  $^1\text{H}$  NMR spectroscopy) and several months in the solid state. We have not observed reactions with any common organic solvents.

The UV-Vis spectra of **2–11** have been obtained. Complexes **2–8** are generally orange and red solids and exhibit weak absorption in the visible region at  $\lambda_{\text{max}} = 471\text{--}521$  nm. The yellow-green, singly substituted anthracene complex **9** exhibits two strong absorbances, at  $\lambda_{\text{max}} = 443$  and  $470$  nm, intensely red-purple, disubstituted anthracene complex **10** has several broad, strong absorptions below  $600$  nm ( $\lambda_{\text{max}} = 492, 525, 565$  nm), and finally the tetrasubstituted complex **11** absorbs strongly at  $\lambda_{\text{max}} = 407, 530, 568$  nm, providing its deep, royal purple colour.

Fluorescence has been noted for a number of arylcarbyne complexes,<sup>9</sup> but is seemingly rather variable, being highly dependent on the nature of the ancillary ligands and carbyne substituent, and readily quenched by addition of electron acceptors. The related 2-naphthylcarbyne complex  $[\text{W}(\equiv\text{CC}_{10}\text{H}_7-2)(\text{CO})_2(\eta\text{-C}_5\text{H}_5)]$  absorbs moderately strongly in the UV (at  $348$  nm) and weakly in the visible region at  $490$  nm, with only very weak emission being observed beyond  $780$  nm.<sup>10</sup> A number of Mo and W arylcarbynes with tripodal poly(pyridyl) ligands are strongly red emissive with  $330$  nm excitation.<sup>9e,9f</sup> Confounding expectations, excitation of the complexes prepared herein at  $350$  nm or their visible-region  $\lambda_{\text{max}}$  values (see Table 1) either did not give rise to any observable emission below  $800$  nm, or these were too broad and weak to be convincingly identified. This was an especially surprising (and rather disappointing) result given the typically strong emission observed for the polycyclic aromatic hydrocarbon appendages. We credit this to quenching by the ‘ $\text{W}(\text{CO})_2(\text{Tp}^*)$ ’ fragment and, in light of the previously noted dependence on the identity of ancillary ligands, expect that co-ligand variation would provide a worthy avenue of future investigation.

The cyclic voltammograms of **2–11** have also been obtained. The monometallic complexes **2, 6–9** exhibit one simple, reversible oxidation event ( $E_{1/2} = 0.63\text{--}0.72$  V) related to

tungsten. Since for simple carbynes of the form  $[W(\equiv CR)(CO)_2(Tp^*)]$  the HOMO is the metal-based orbital associated with retrodonative carbonyl binding,<sup>11</sup> it is orthogonal to the  $W\equiv C$  bond and therefore accordingly the oxidation potential is unlikely to be directly responsive to minor variations in carbyne substituents. The polysubstituted complexes **3–5**, **10** and **11** feature two or more events with significant overlap/broadening which due to rather poor resolution are cautiously identified at  $E_{1/2} = 0.61–0.74$  V for the first oxidation and 0.73–0.88 V for the subsequent processes. While, due to poor separation of oxidation potentials, these data are given with some reservations, the results nevertheless indicate that there must be at least a small degree of communication occurring between tungsten centres.

## Notes and references

1. N. G. Connelly and W. E. Geiger, *Chem. Rev.*, 1996, **96**, 877-910.
2. Agilent, CrysAlis PRO, Agilent Technologies Ltd, Yarnton, Oxfordshire, England, 2014.
3. (a) G. Sheldrick, *Acta Crystallogr. Sect. A: Found. Crystallogr.*, 2008, **64**, 112-122; (b) G. M. Sheldrick, *Acta Crystallogr. Sect. C: Cryst. Struct. Commun.*, 2015, **71**, 3-8.
4. (a) C. F. Macrae, P. R. Edgington, P. McCabe, E. Pidcock, G. P. Shields, R. Taylor, M. Towler and J. van de Streek, *J. Appl. Crystallogr.*, 2006, **39**, 453-457; (b) C. F. Macrae, I. J. Bruno, J. A. Chisholm, P. R. Edgington, P. McCabe, E. Pidcock, L. Rodriguez-Monge, R. Taylor, J. van de Streek and P. A. Wood, *J. Appl. Crystallogr.*, 2008, **41**, 466-470.
5. A. Reinholdt, J. Bendix, A. F. Hill and R. A. Manzano, *Dalton Trans.*, 2018, **47**, 14893-14896.
6. R. Uson, A. Laguna, M. Laguna, D. A. Briggs, H. H. Murray and J. P. Fackler Jr, in *Inorg. Synth.*, ed. H. D. Kaesz, 2007, vol. 26, ch. 17.
7. (a) P. Rios, T. S. Carter, T. J. Mooibroek, M. P. Crump, M. Lisbjerg, M. Pittelkow, N. T. Supekar, G.-J. Boons and A. P. Davis, *Angew. Chem. Int. Ed.*, 2016, **55**, 3387-3392; (b) D. Zych, A. Kurpanik, A. Slodek, A. Maroń, M. Pająk, G. Szafraniec-Gorol, M. Matussek, S. Krompiec, E. Schab-Balcerzak, S. Kotowicz, M. Siwy, K. Smolarek, S. Maćkowski and W. Danikiewicz, *Chem. Eur. J.*, 2017, **23**, 15746-15758.
8. O. V. Dolomanov, L. J. Bourhis, R. J. Gildea, J. A. K. Howard and H. Puschmann, *J. Appl. Crystallogr.*, 2009, **42**, 339-341.
9. (a) A. B. Bocarsly, R. E. Cameron, H. D. Rubin, G. A. McDermott, C. R. Wolff and A. Mayr, *Inorg. Chem.*, 1985, **24**, 3976-3978; (b) S. Trammell, B. P. Sullivan, L. M. Hodges, W. D. Harman, S. R. Smith and H. H. Thorp, *Inorg. Chem.*, 1995, **34**, 2791-2792; (c) W.-M. Xue, Y. Wang, T. C. W. Mak and C.-M. Che, *J. Chem. Soc., Dalton Trans.*, 1996, 2827-2834; (d) W.-M. Xue, M. C. W. Chan, T. C. W. Mak and C.-M. Che, *Inorg. Chem.*, 1997, **36**, 6437-6439; (e) F.-W. Lee, M. Chi-Wang Chan, K.-K. Cheung and C.-M. Che, *J. Organomet. Chem.*, 1998, **563**, 191-200; (f) F.-W. Lee, M. C.-W. Chan, K.-K. Cheung and C.-M. Che, *J. Organomet. Chem.*, 1998, **552**, 255-263; (g) C. C. S. Cavalheiro, K. E. Torraca, K. S. Schanze and L. McElwee-White, *Inorg. Chem.*, 1999, **38**, 3254-3257; (h) B. W. Cohen, B. M. Lovaasen, C. K. Simpson, S. D. Cummings, R. F. Dallinger and M. D. Hopkins, *Inorg. Chem.*, 2010, **49**, 5777-5779; (i) B. M. Lovaasen, J. V. Lockard, B. W. Cohen, S. Yang, X. Zhang, C. K. Simpson, L. X. Chen and M. D. Hopkins, *Inorg. Chem.*, 2012, **51**, 5660-5670; (j) D. B. Moravec and M. D. Hopkins, *Chem. Eur. J.*, 2013, **19**, 17082-17091; (k) D. B. Moravec and M. D. Hopkins, *The Journal of Physical Chemistry A*, 2013, **117**, 1744-1755; (l) C. A. Morales-Verdejo, X. Zarate, E. Schott, S. Correa and I. Martinez-Díaz, *RSC Advances*, 2015, **5**, 25594-25602.
10. T. K. Schoch, A. D. Main, R. D. Burton, L. A. Lucia, E. A. Robinson, K. S. Schanze and L. McElwee-White, *Inorg. Chem.*, 1996, **35**, 7769-7775.
11. (a) A. F. Hill and R. A. Manzano, *Angew. Chem. Int. Ed. Engl.*, 2019, **58**, 15354-15357; (b) A. F. Hill and R. A. Manzano, *Dalton Trans.*, 2019, **48**, 6596-6561.

## COMMUNICATION

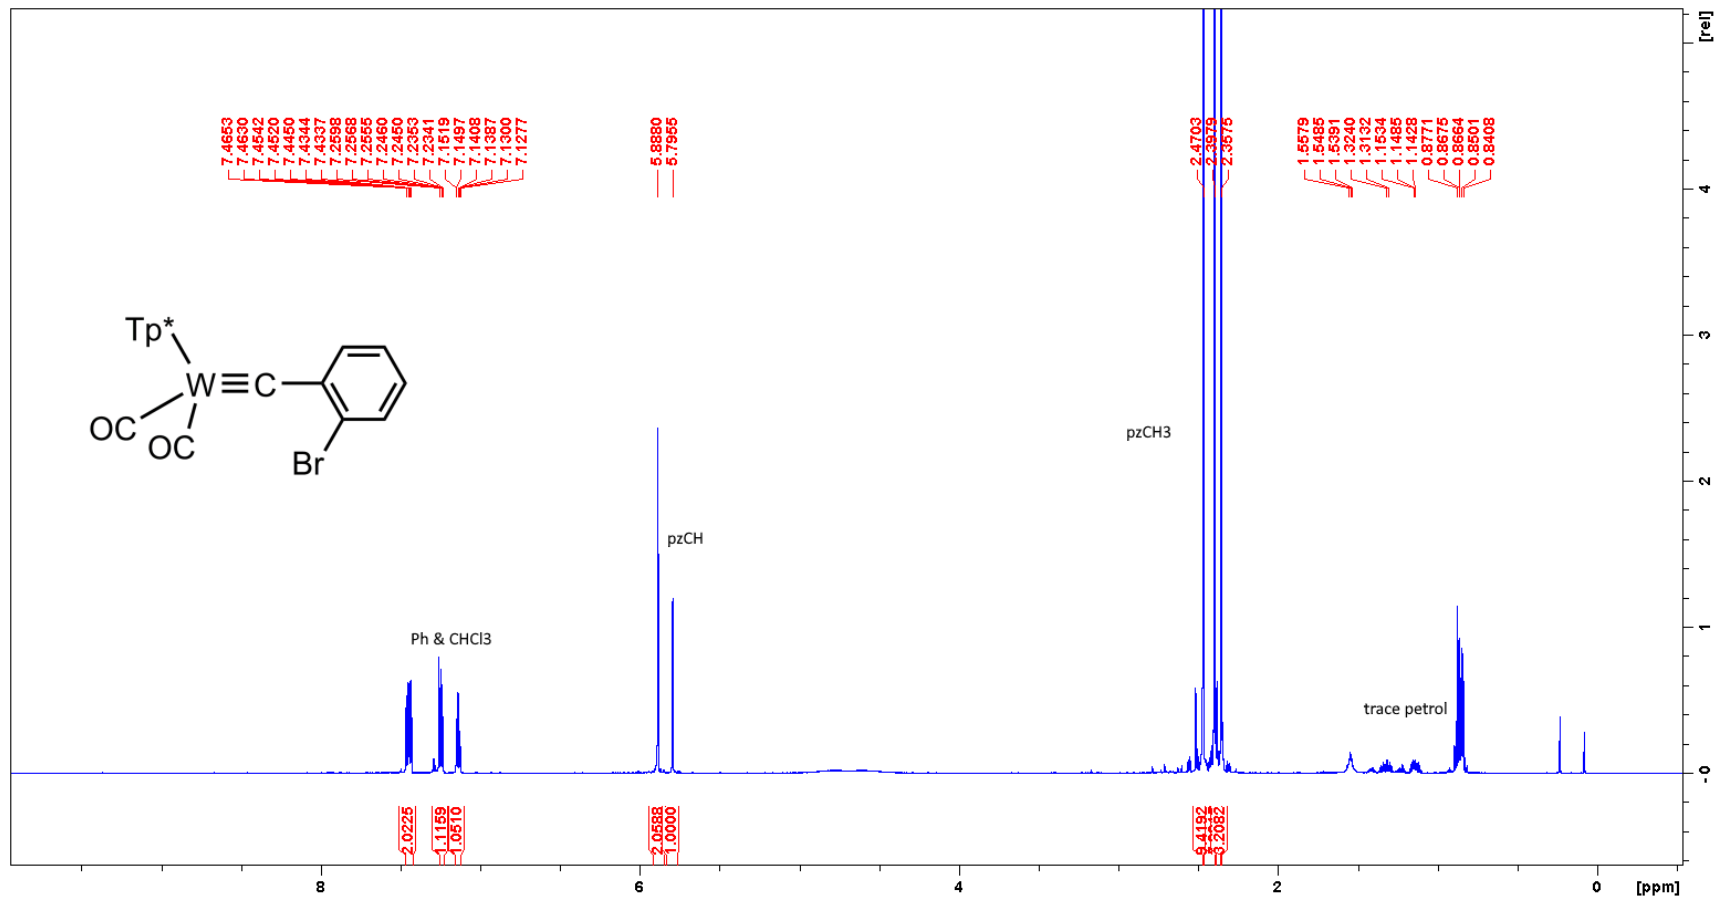

$^1\text{H}$  NMR spectrum (700 MHz,  $\text{CDCl}_3$ , 298 K) for  $[\text{W}(\equiv\text{CC}_6\text{H}_4\text{Br-2})(\text{CO})_2(\text{Tp}^*)] \cdot 2 \cdot 0.5(\text{C}_6\text{H}_{14})$ .



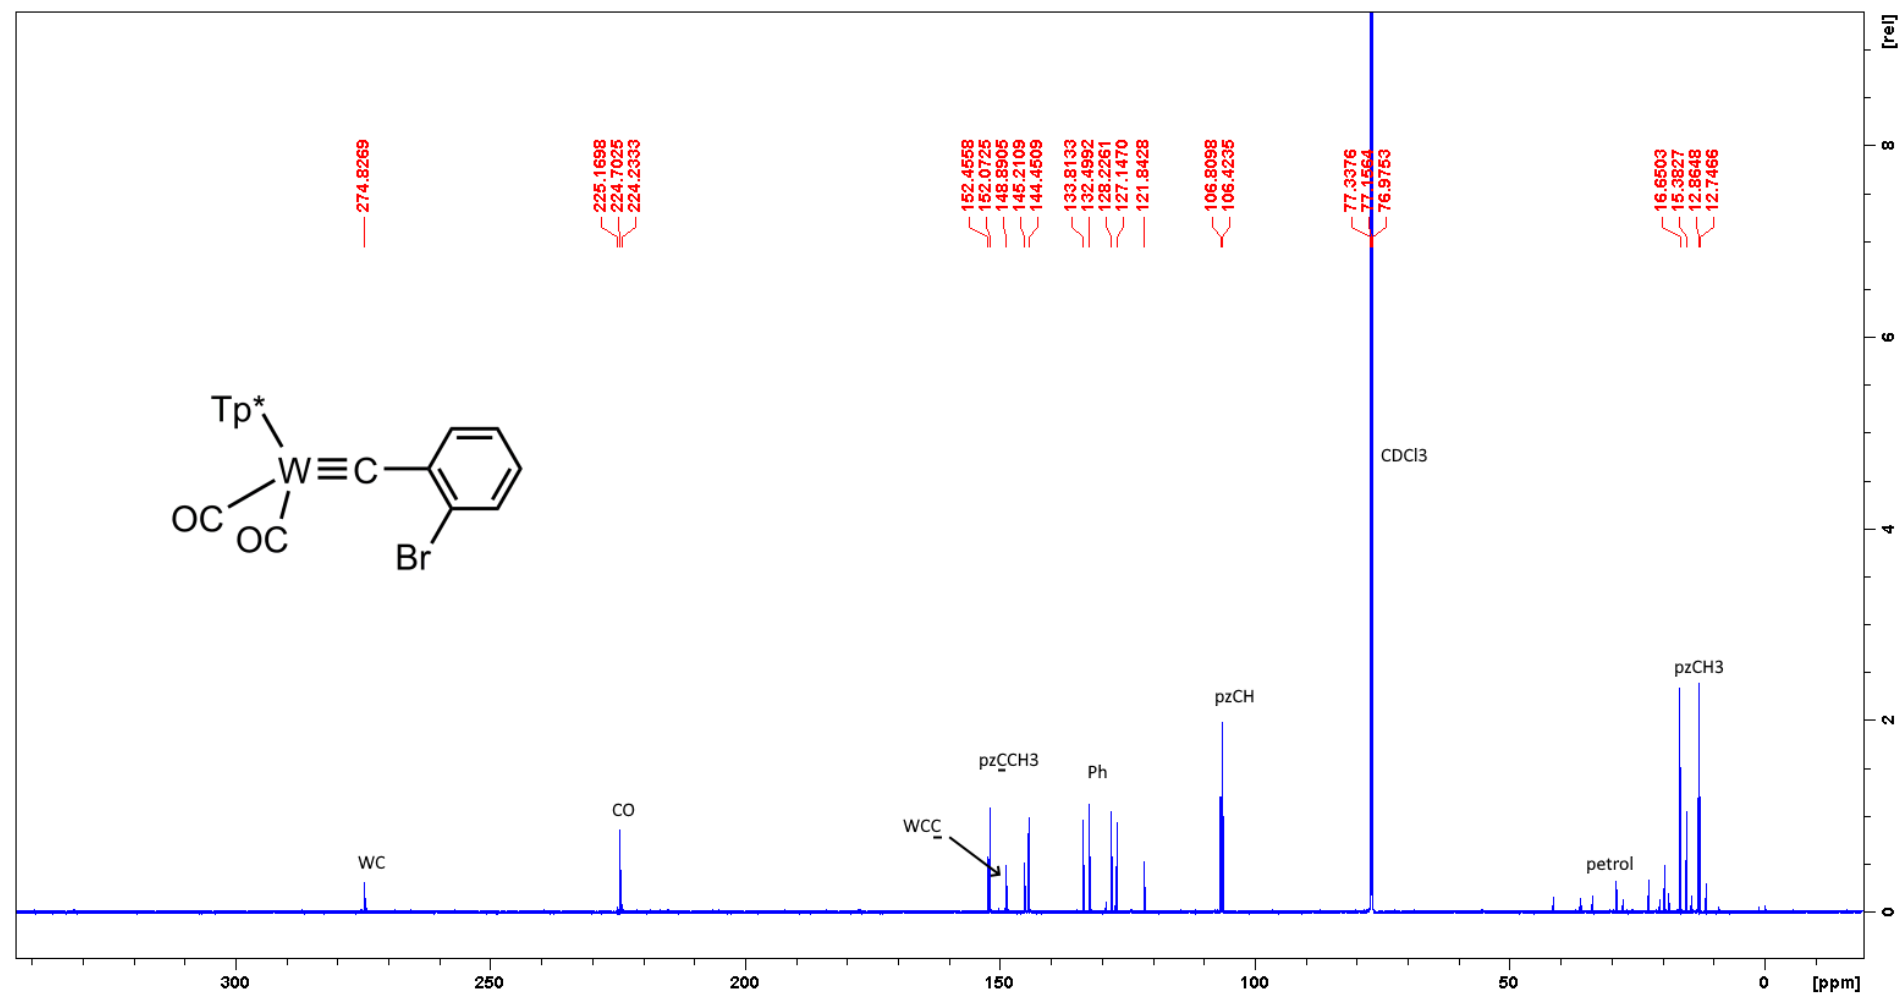

$^{13}\text{C}\{^1\text{H}\}$  NMR spectrum (176 MHz,  $\text{CDCl}_3$ , 298 K) for  $[\text{W}(\equiv\text{CC}_6\text{H}_4\text{Br-2})(\text{CO})_2(\text{Tp}^*)] \cdot 2 \cdot 0.5(\text{C}_6\text{H}_{14})$ .

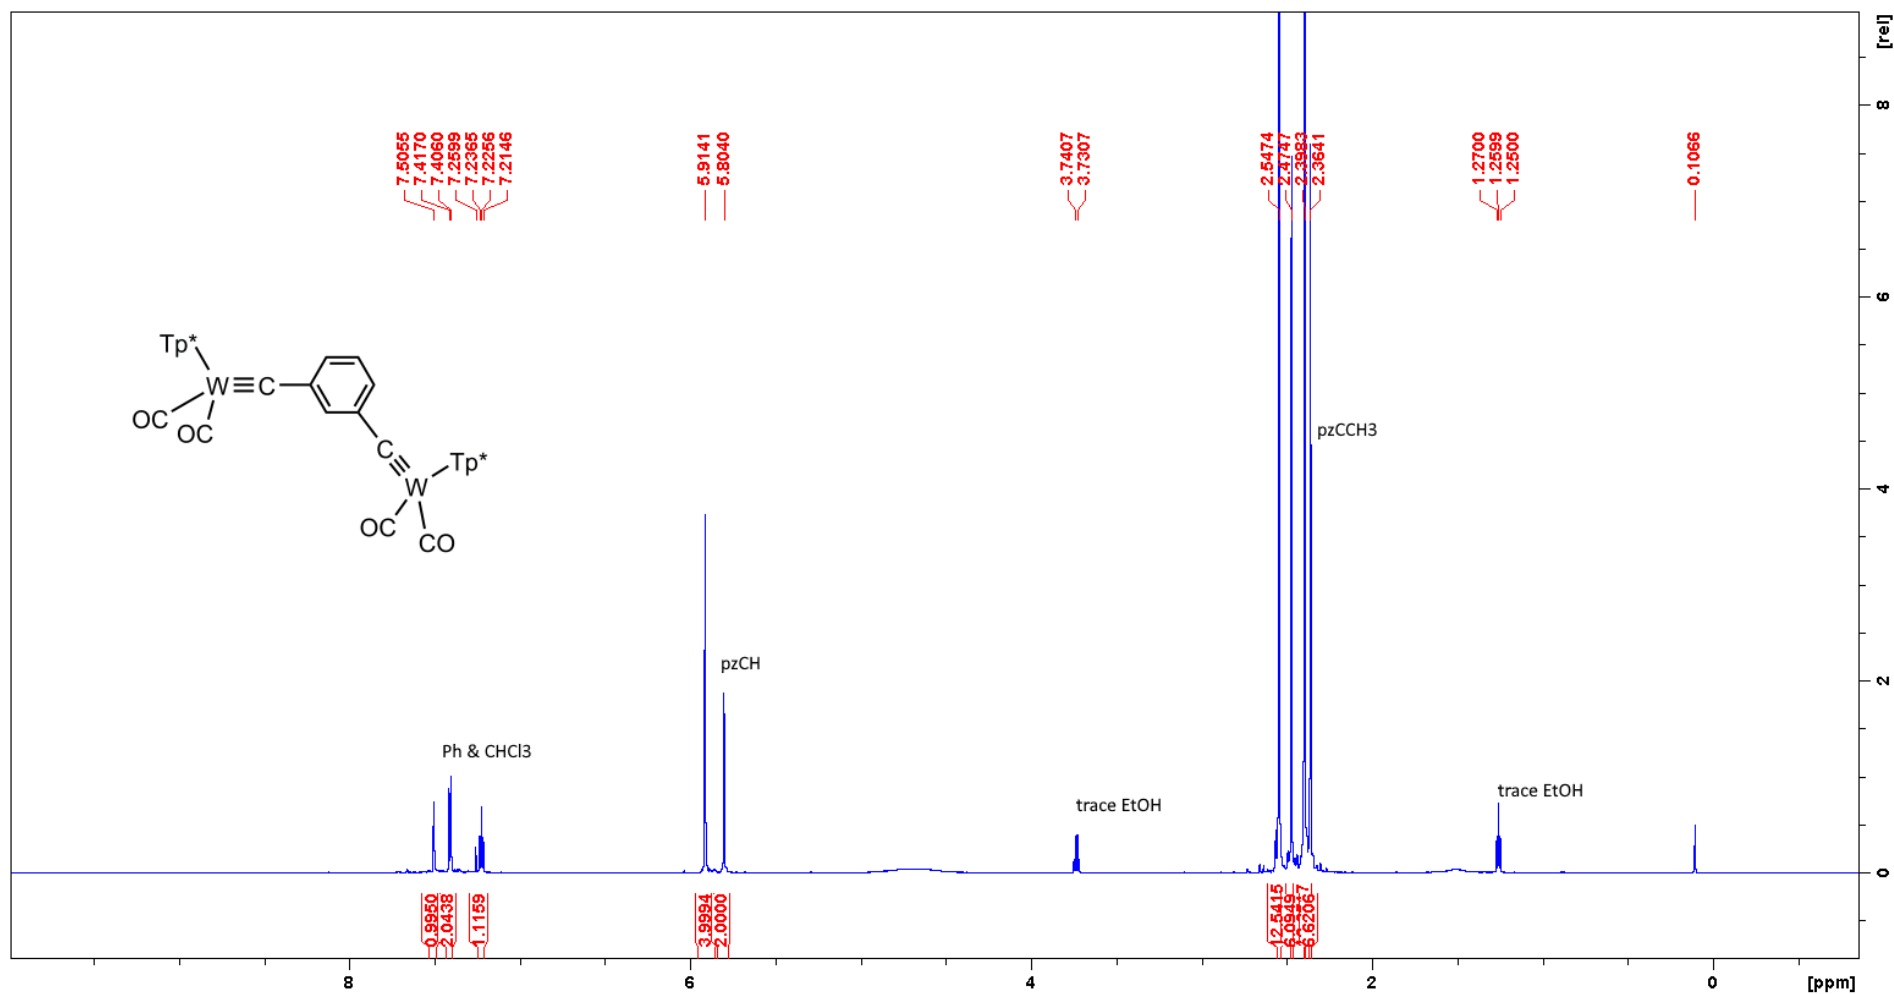

$^1H$  NMR spectrum (700 MHz,  $CDCl_3$ , 298 K) for  $[1,3-\{(Tp^*)(CO)_2W \equiv C\}_2C_6H_4]$  (**3**).

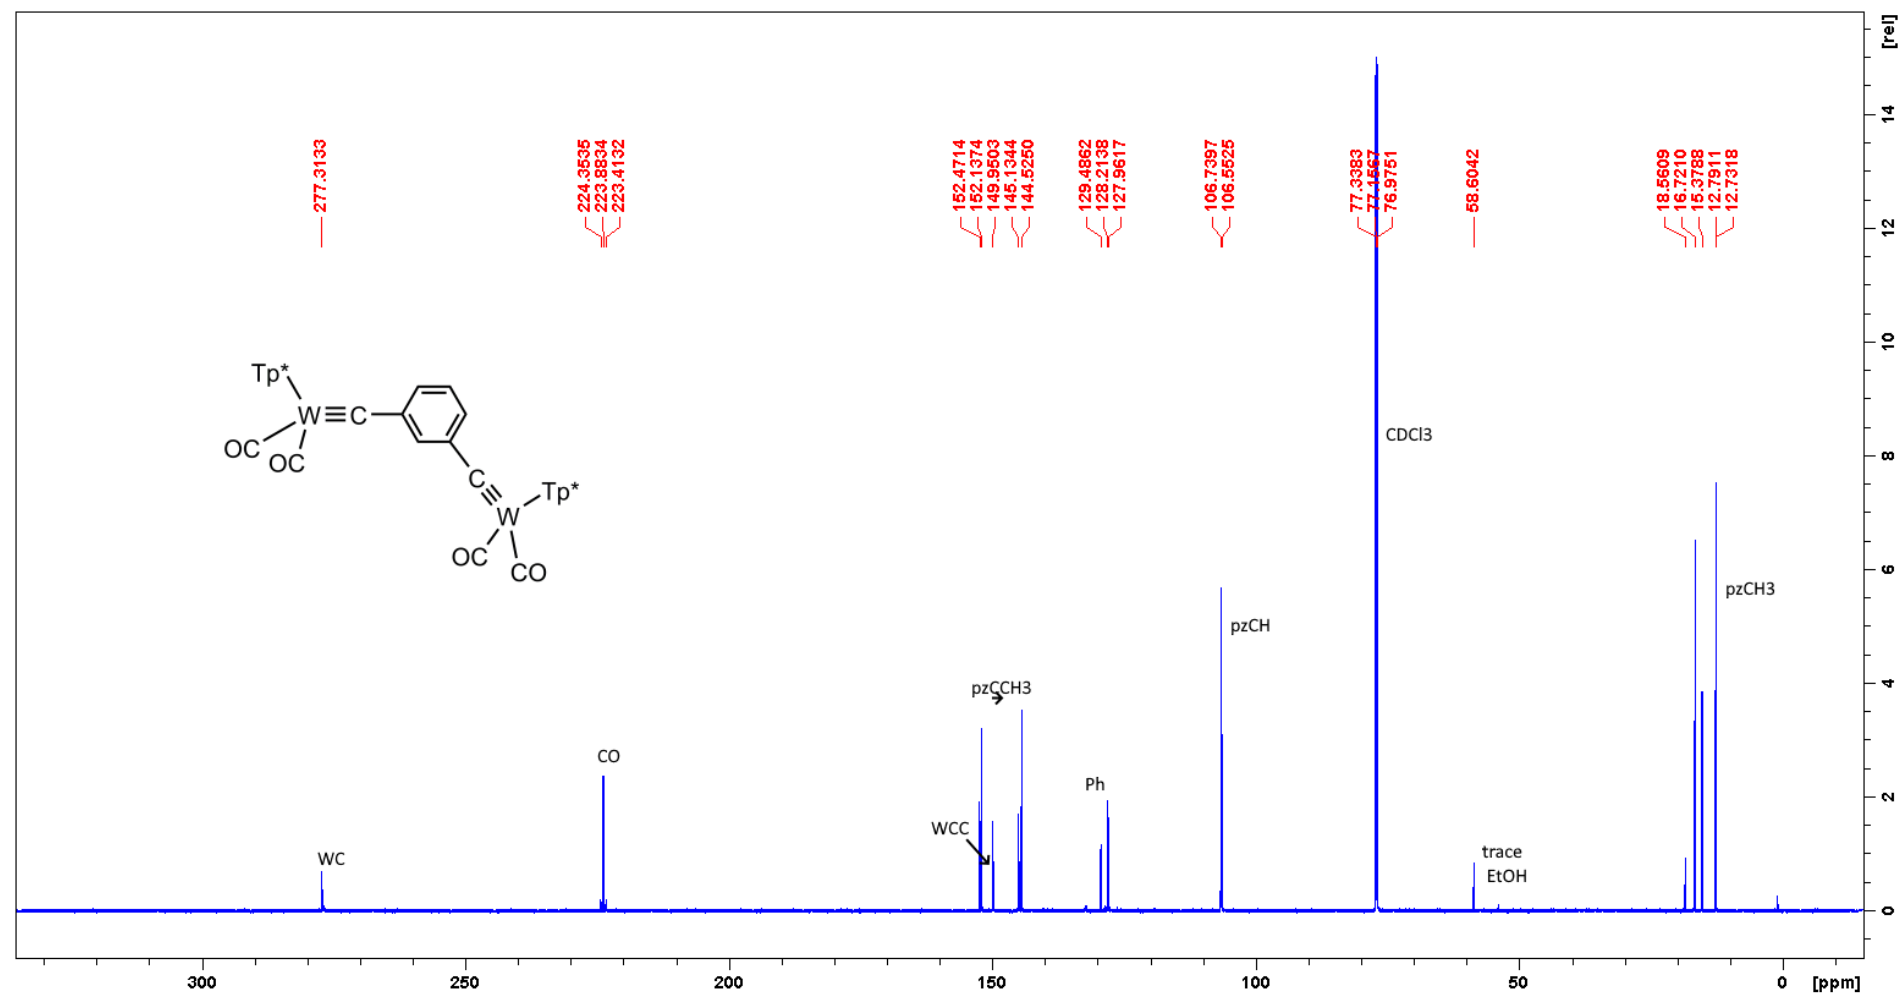

$^{13}\text{C}\{^1\text{H}\}$  NMR spectrum (176 MHz,  $\text{CDCl}_3$ , 298 K) for  $[1,3-((\text{Tp}^*)(\text{CO})_2)\text{W}\equiv\text{C}]_2\text{C}_6\text{H}_4$  (3).

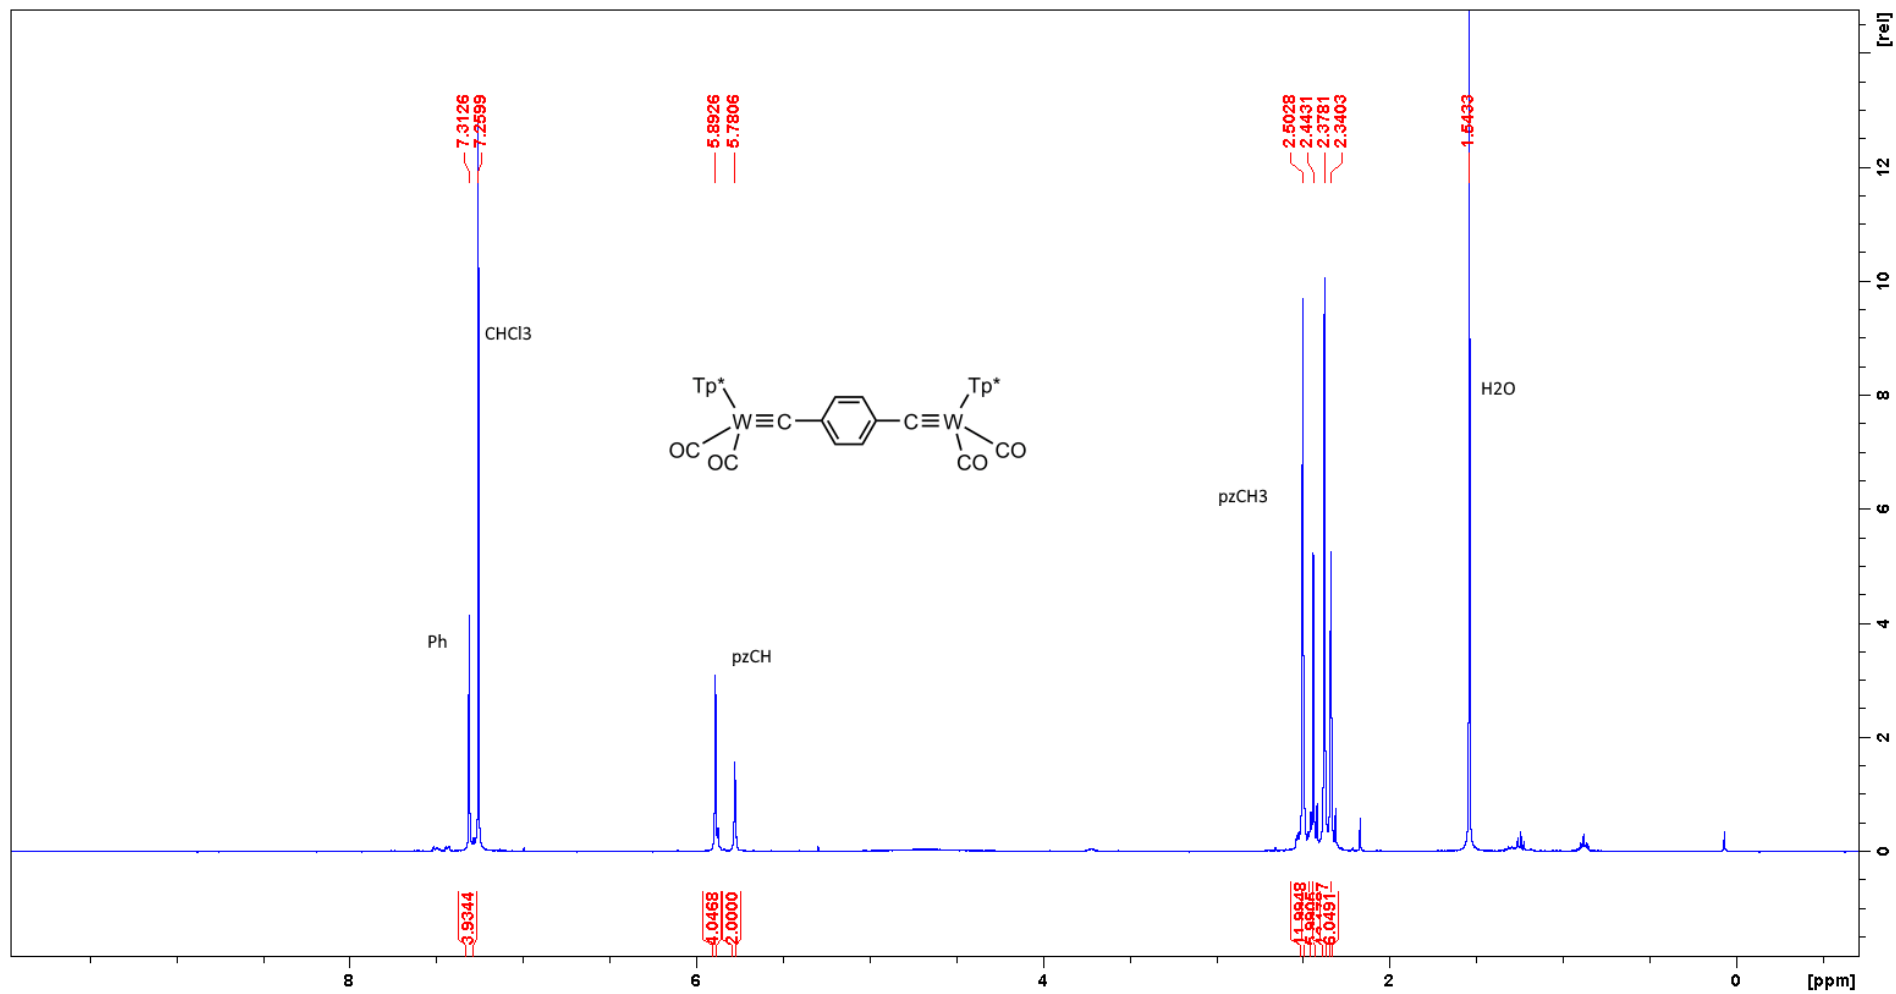

<sup>1</sup>H NMR spectrum (400 MHz, CDCl<sub>3</sub>, 298 K) for [1,4-((Tp\*)(CO)<sub>2</sub>W=C)<sub>2</sub>C<sub>6</sub>H<sub>4</sub>] (4).

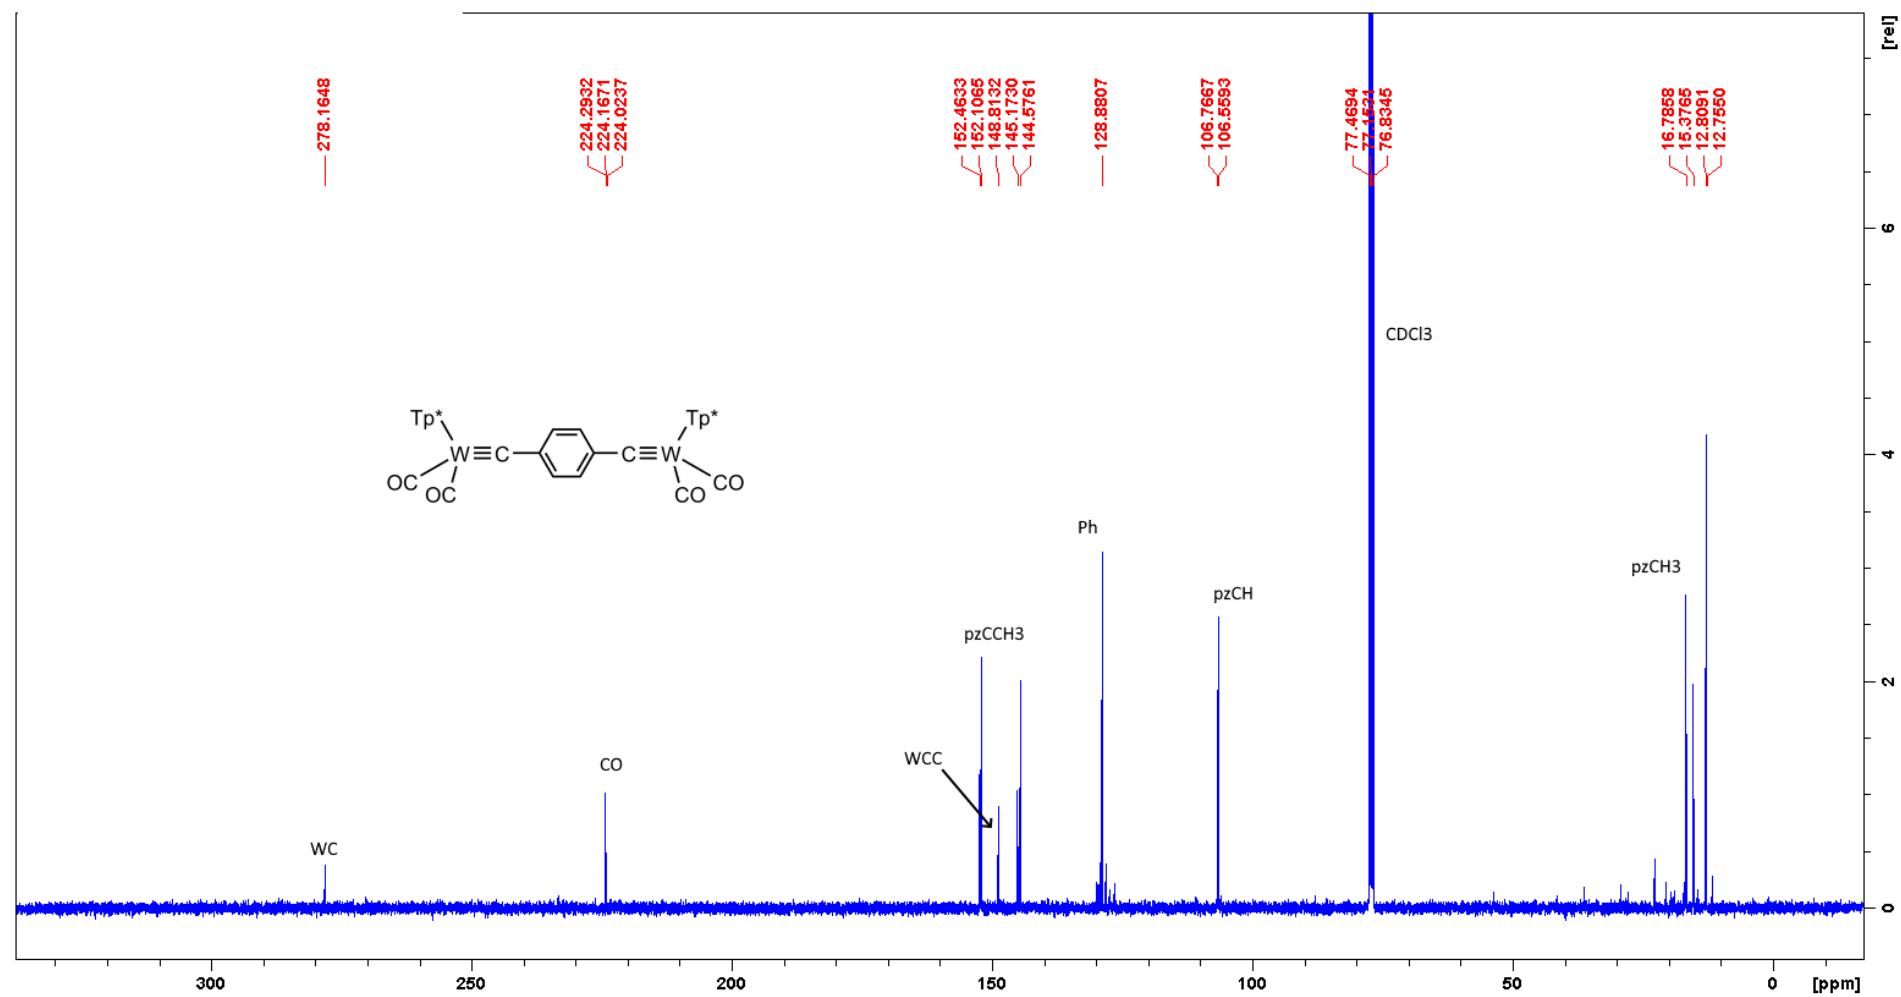

<sup>13</sup>C{<sup>1</sup>H} NMR spectrum (176 MHz, CDCl<sub>3</sub>, 298 K) for [1,4-((Tp\*)(CO)<sub>2</sub>W≡C)<sub>2</sub>C<sub>6</sub>H<sub>4</sub>] (4).

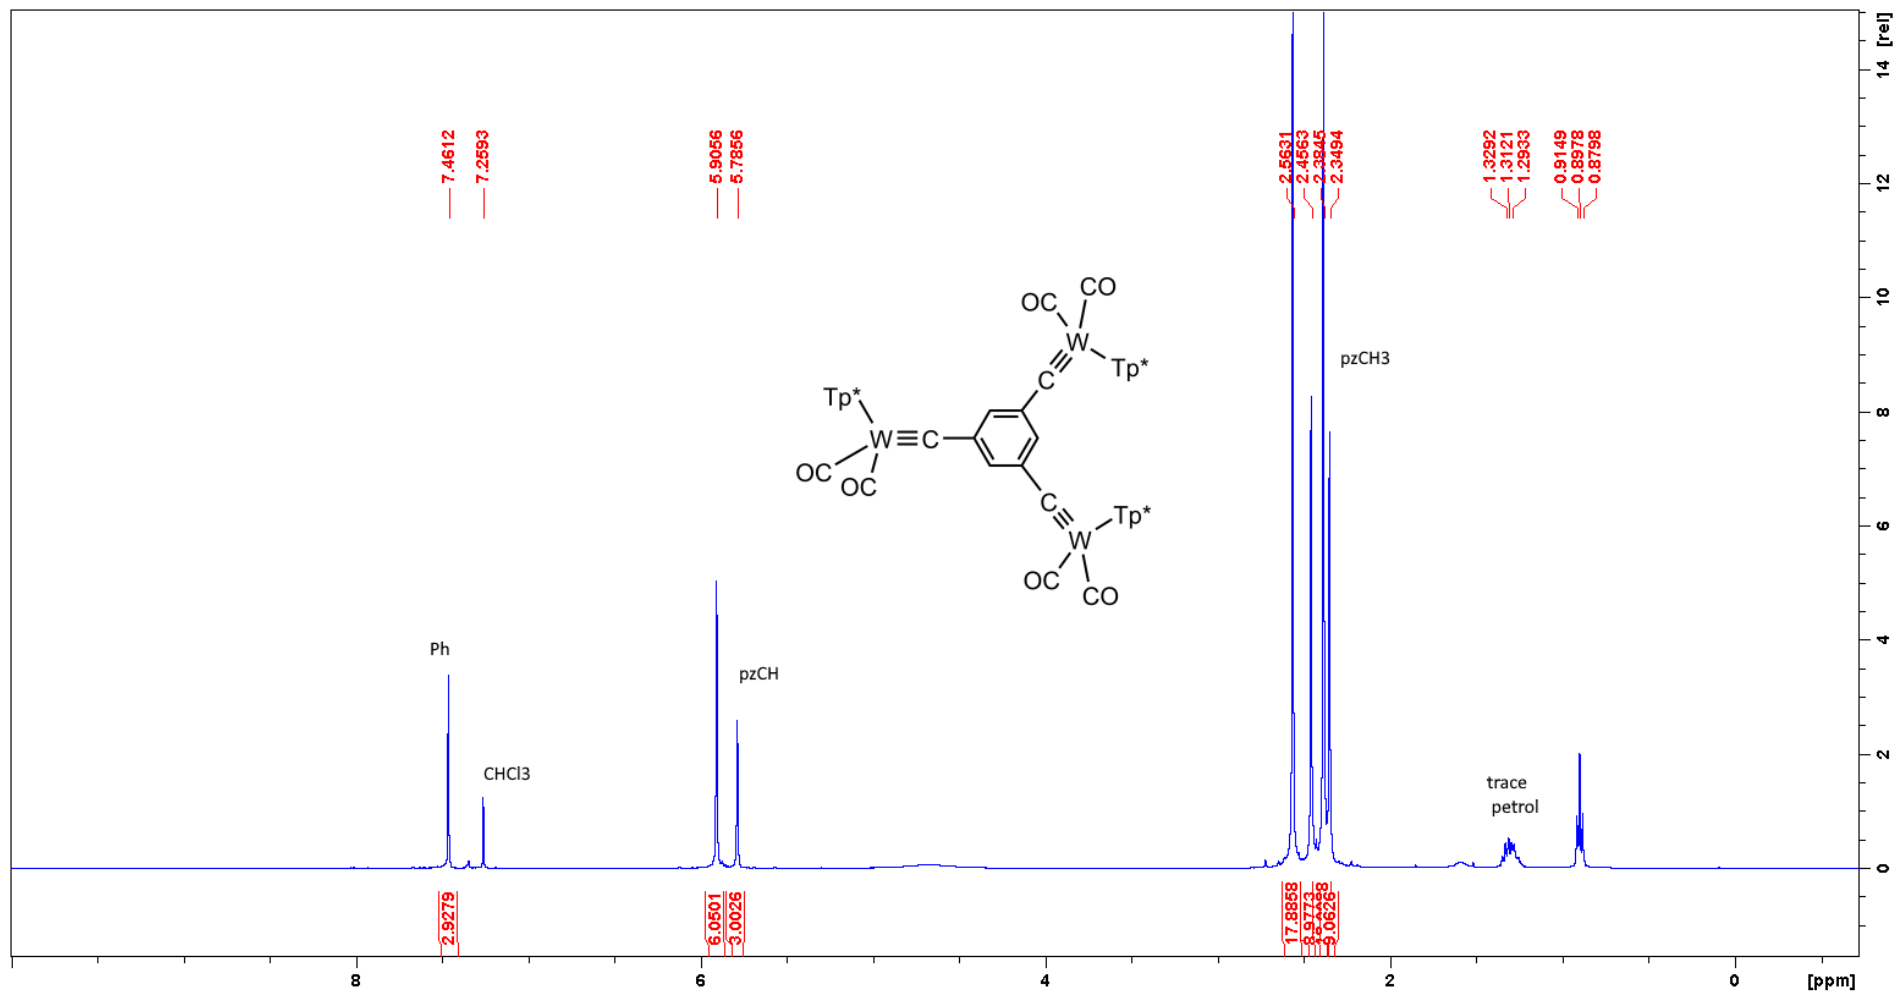

$^1\text{H}$  NMR spectrum (400 MHz,  $\text{CDCl}_3$ , 298 K) for  $[1,3,5\text{-}((\text{Tp}^*)(\text{CO})_2\text{W}\equiv\text{C})_3\text{C}_6\text{H}_4]$  (**5**).

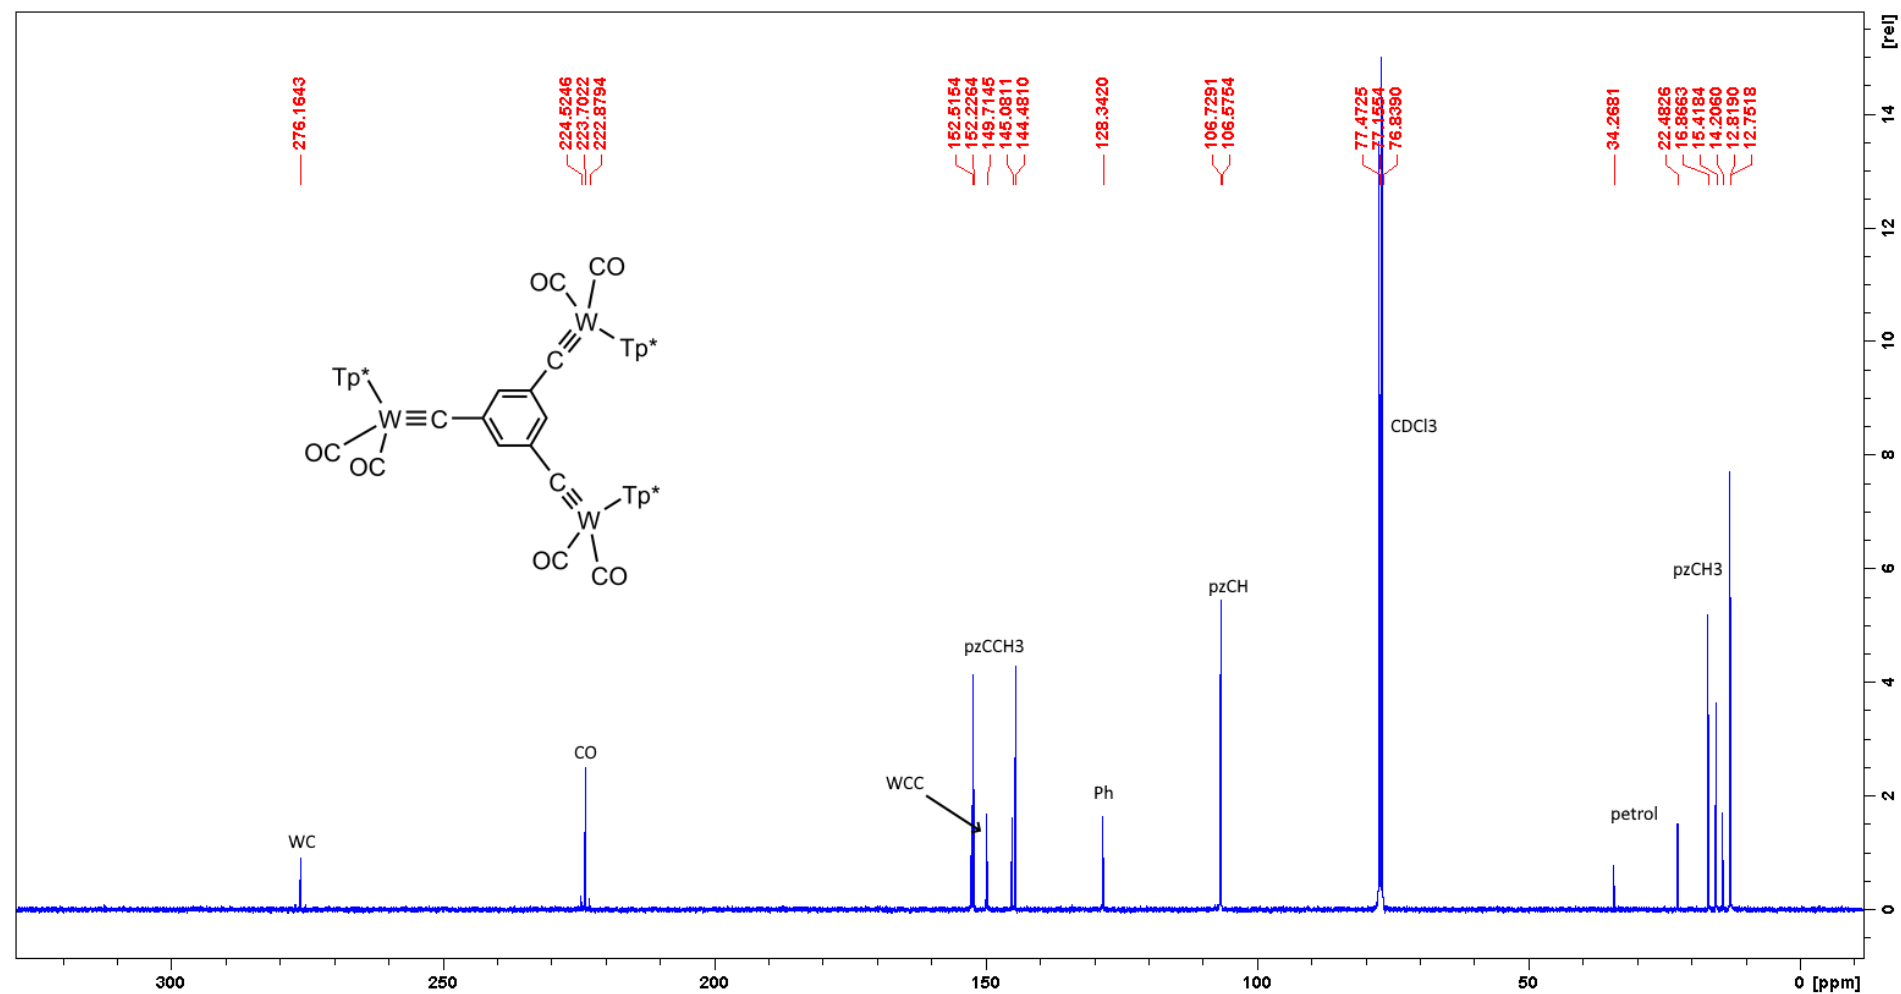

$^{13}\text{C}\{^1\text{H}\}$  NMR (101 MHz,  $\text{CDCl}_3$ , 298 K) for  $[1,3,5\text{-}(\text{Tp}^*)(\text{CO})_2\text{W}\equiv\text{C}]_3\text{C}_6\text{H}_4$  (**5**).

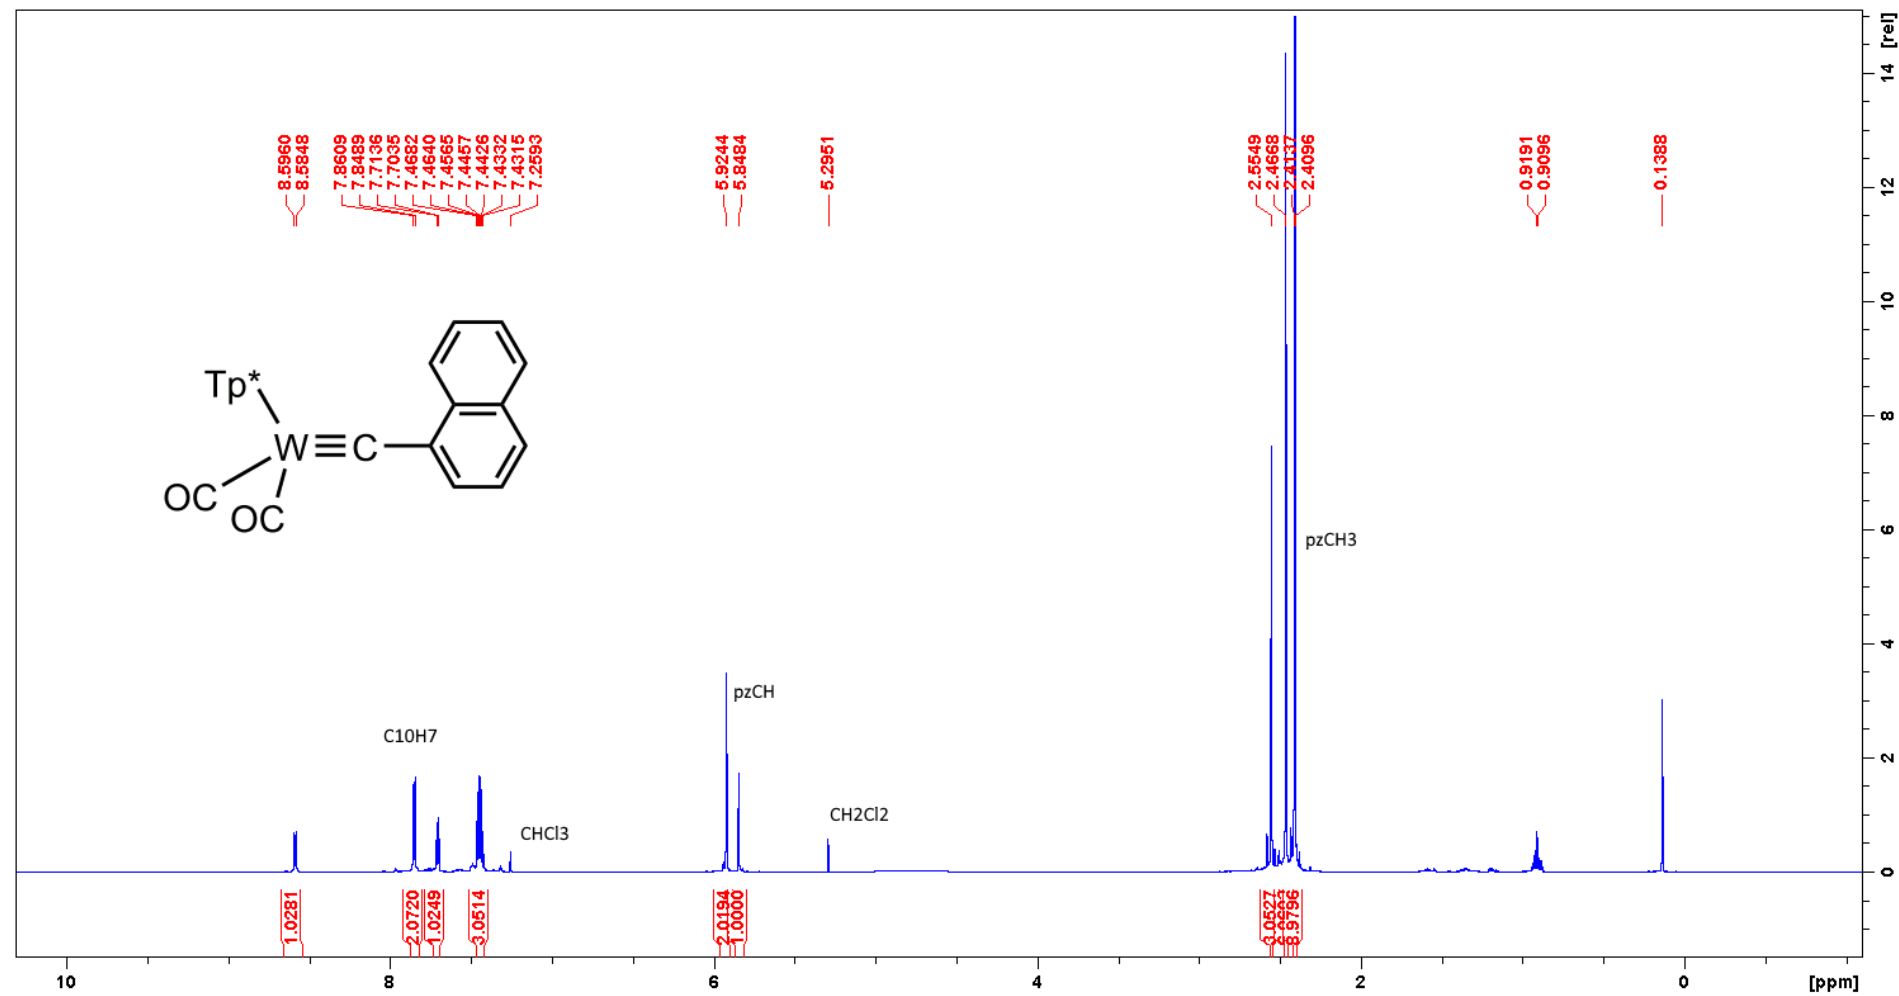

$^1\text{H}$  NMR spectrum (700 MHz,  $\text{CDCl}_3$ , 298 K) for  $[1-\{(\text{Tp}^*)(\text{CO})_2\text{W}\equiv\text{C}\}\text{C}_{10}\text{H}_7]$  (**6**).



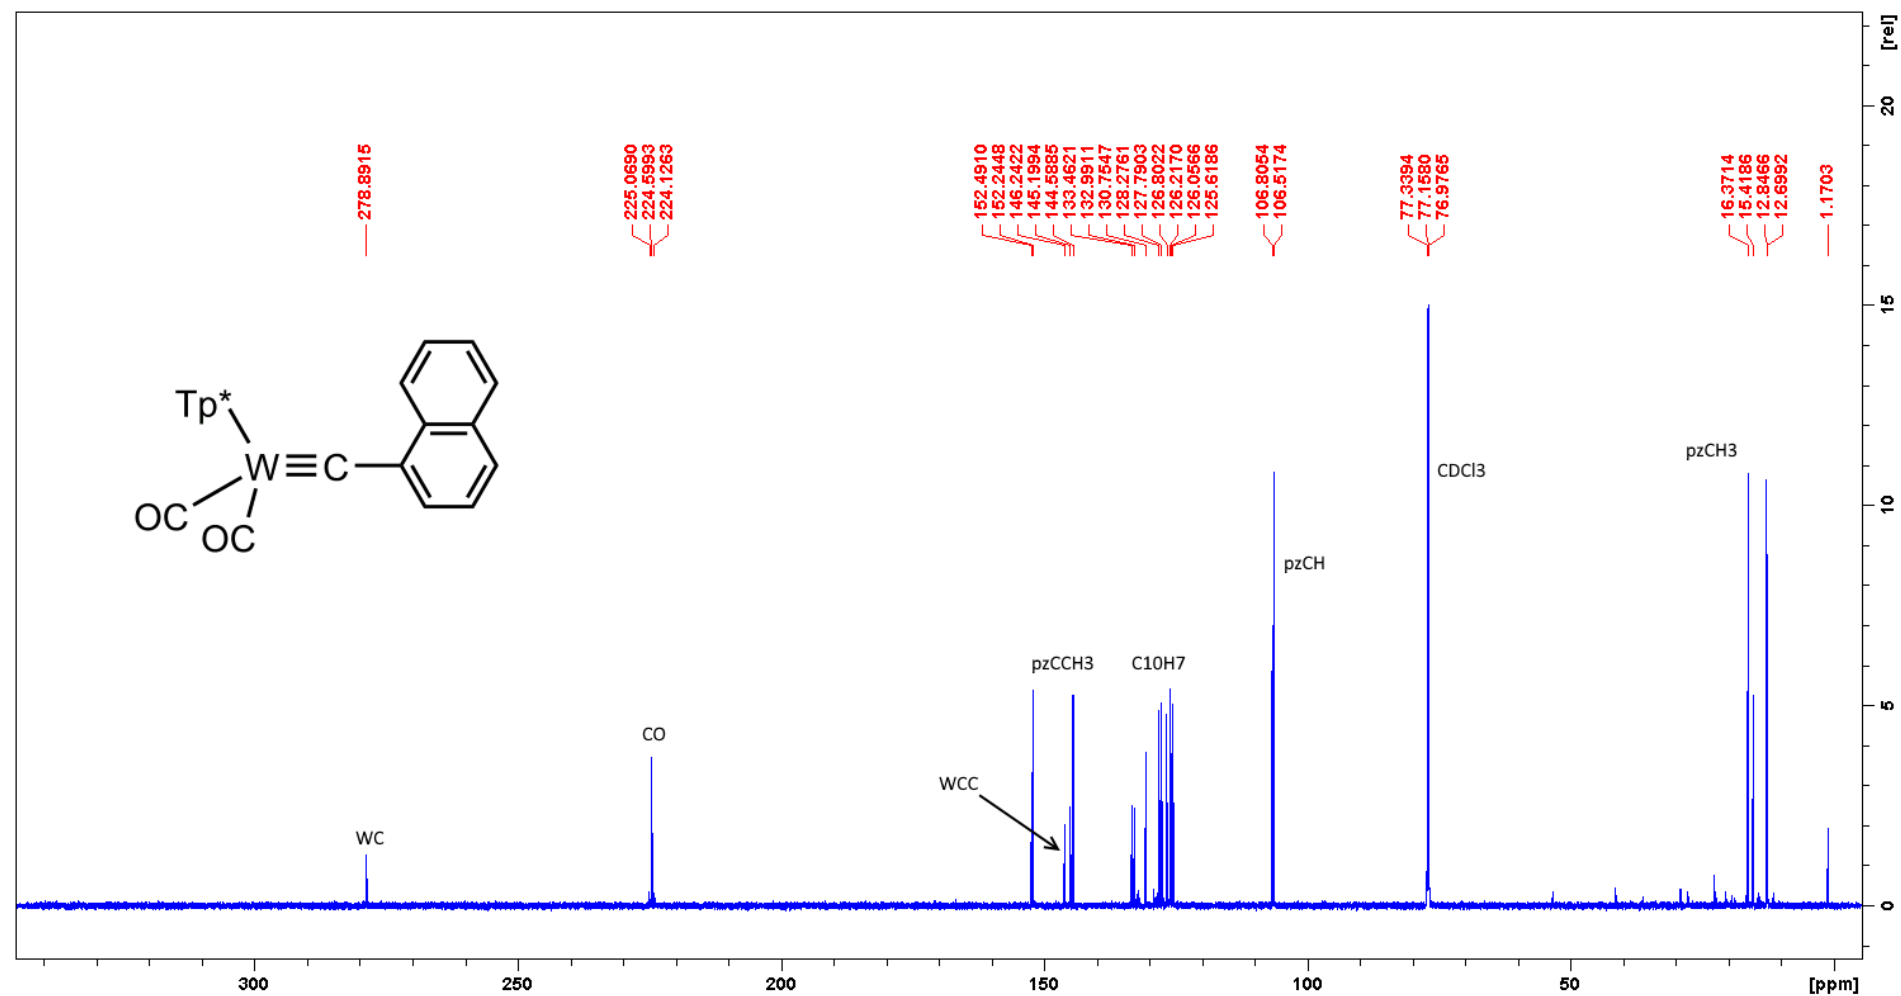

$^{13}\text{C}\{^1\text{H}\}$  NMR spectrum (176 MHz,  $\text{CDCl}_3$ , 298 K) for  $[1-\{(\text{Tp}^*)(\text{CO})_2\text{W}\equiv\text{C}\}\text{C}_{10}\text{H}_7]$  (**6**).

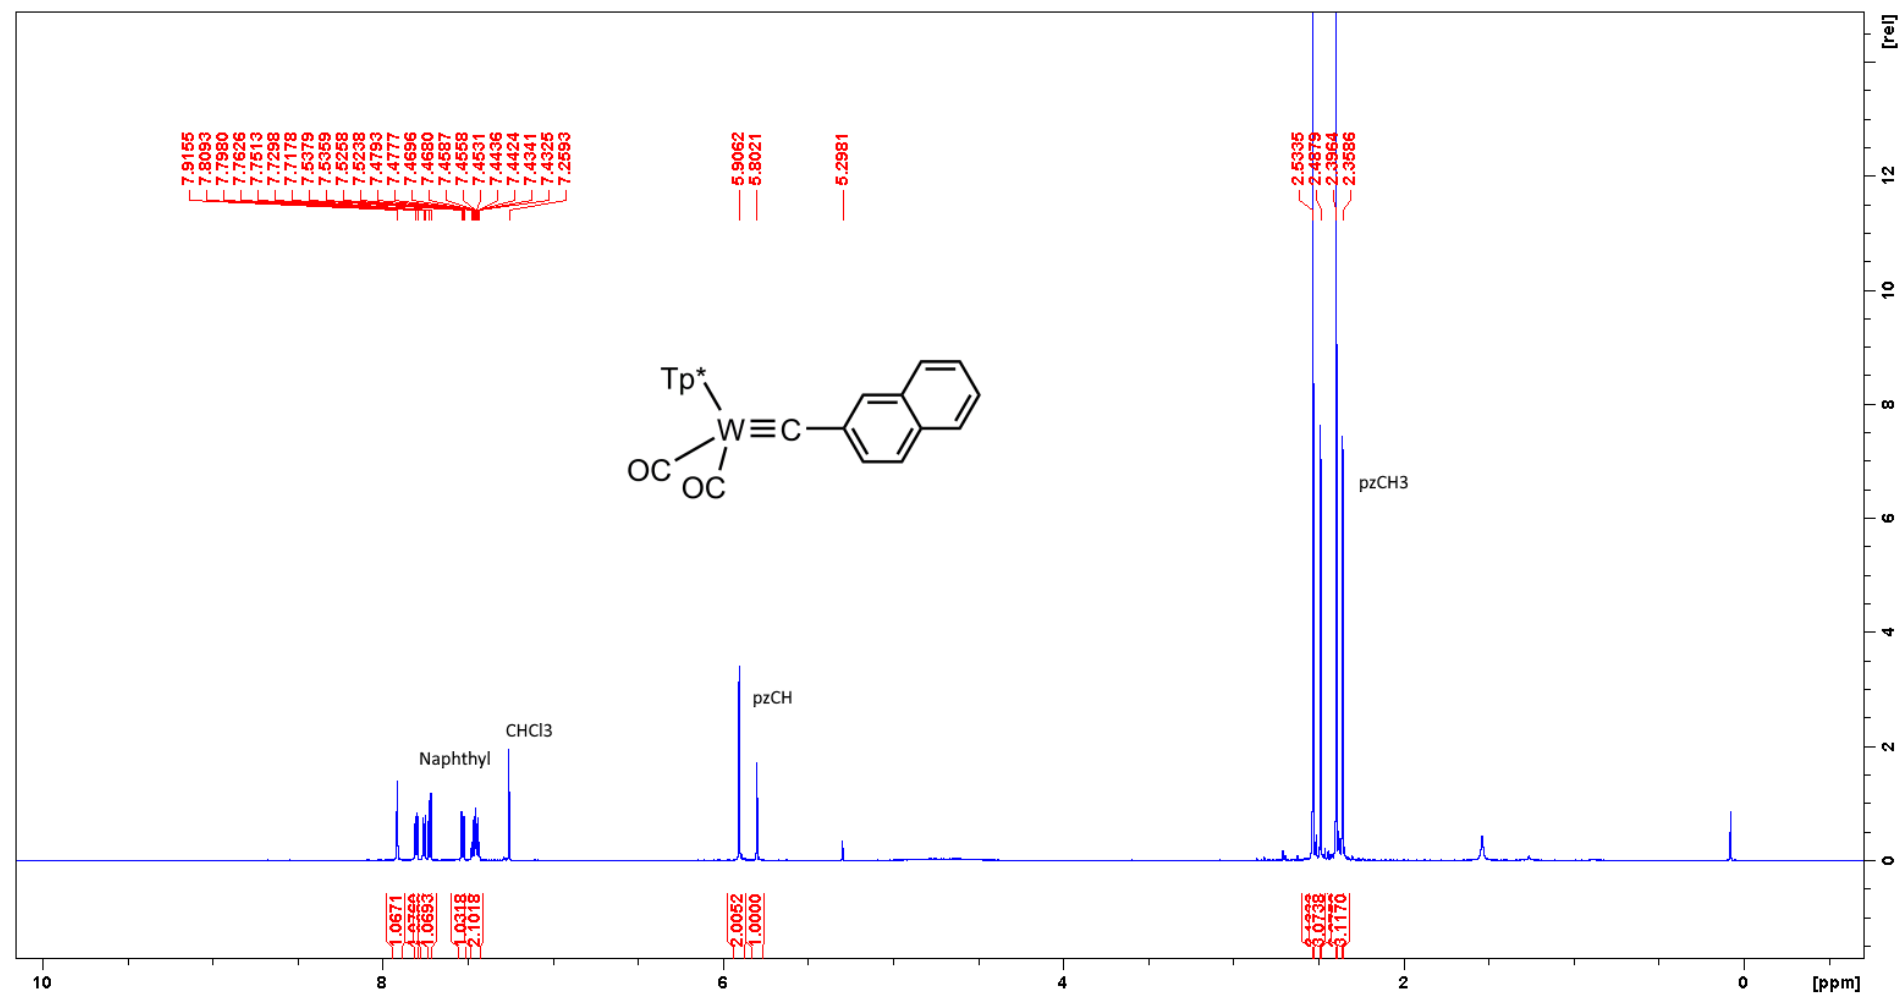

$^1\text{H}$  NMR spectrum (700 MHz,  $\text{CDCl}_3$ , 298 K) for  $[2-((\text{Tp}^*)(\text{CO})_2\text{W}\equiv\text{C})\text{C}_{10}\text{H}_7]$  (7).

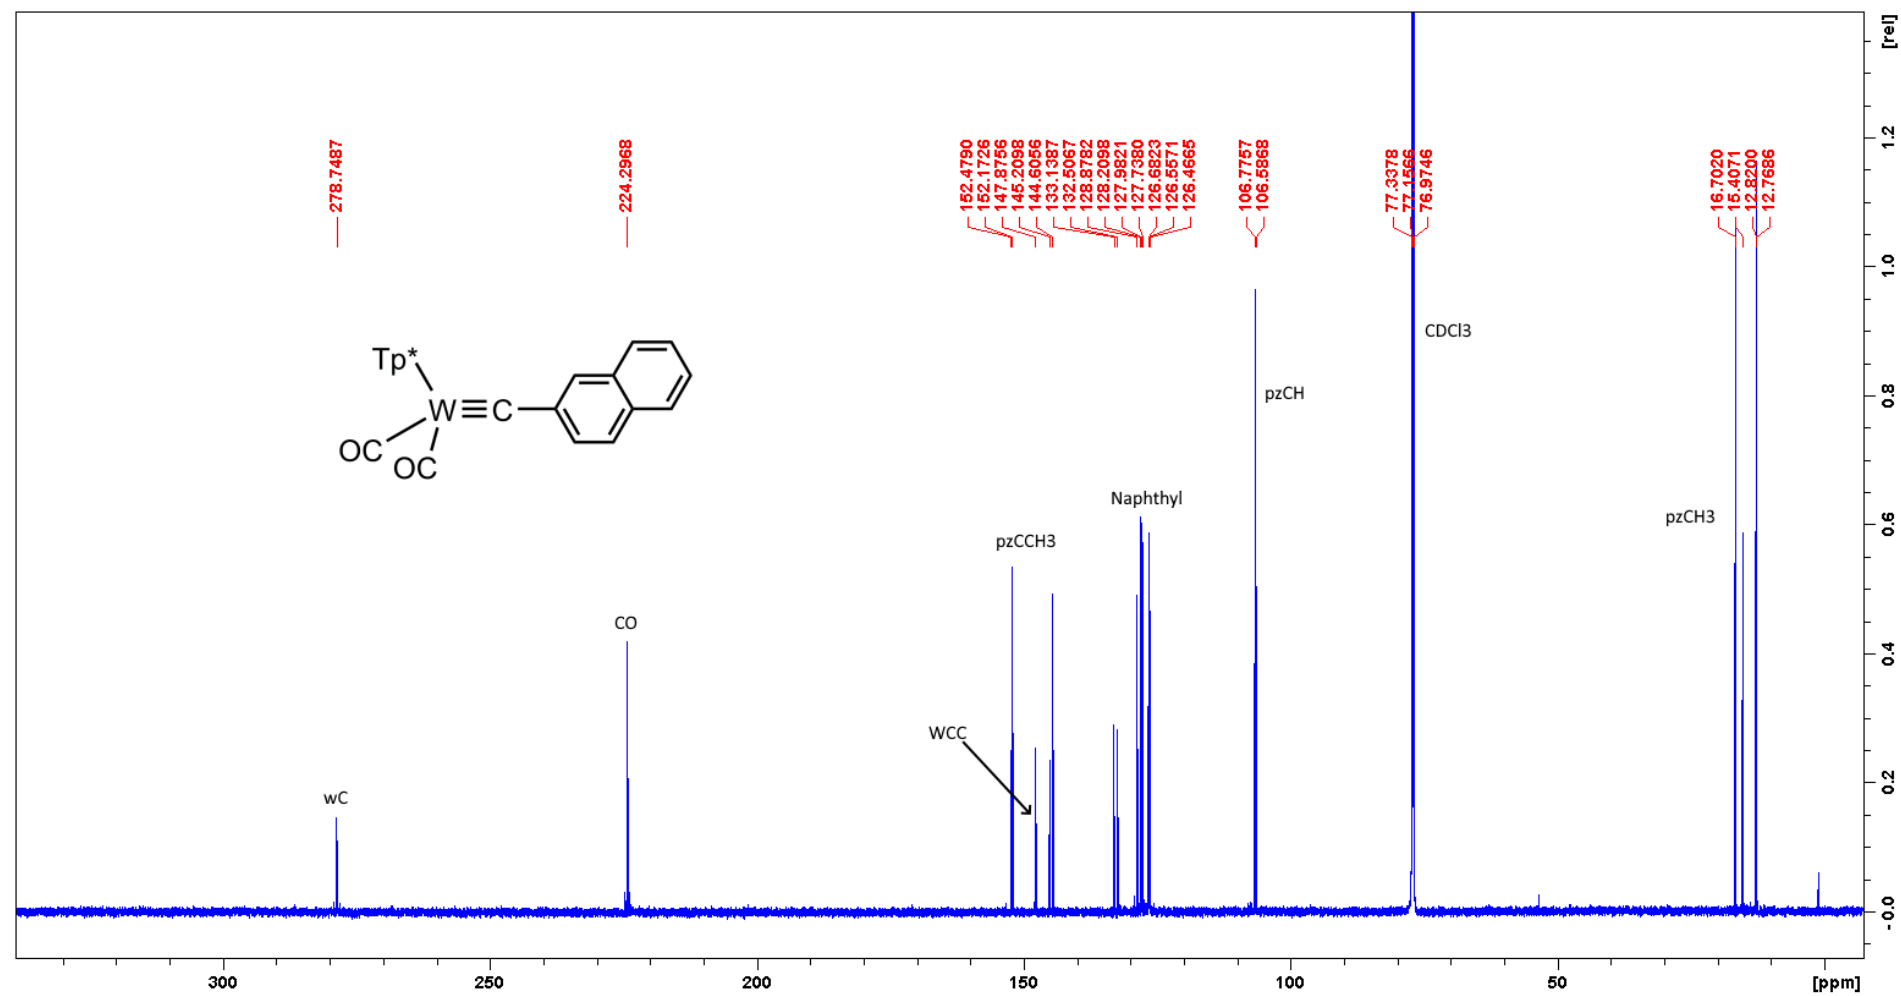

$^{13}\text{C}\{^1\text{H}\}$  NMR spectrum (176 MHz,  $\text{CDCl}_3$ , 298 K) for  $[2-((\text{Tp}^*)(\text{CO})_2\text{W}\equiv\text{C})\text{C}_{10}\text{H}_7]$  (7).

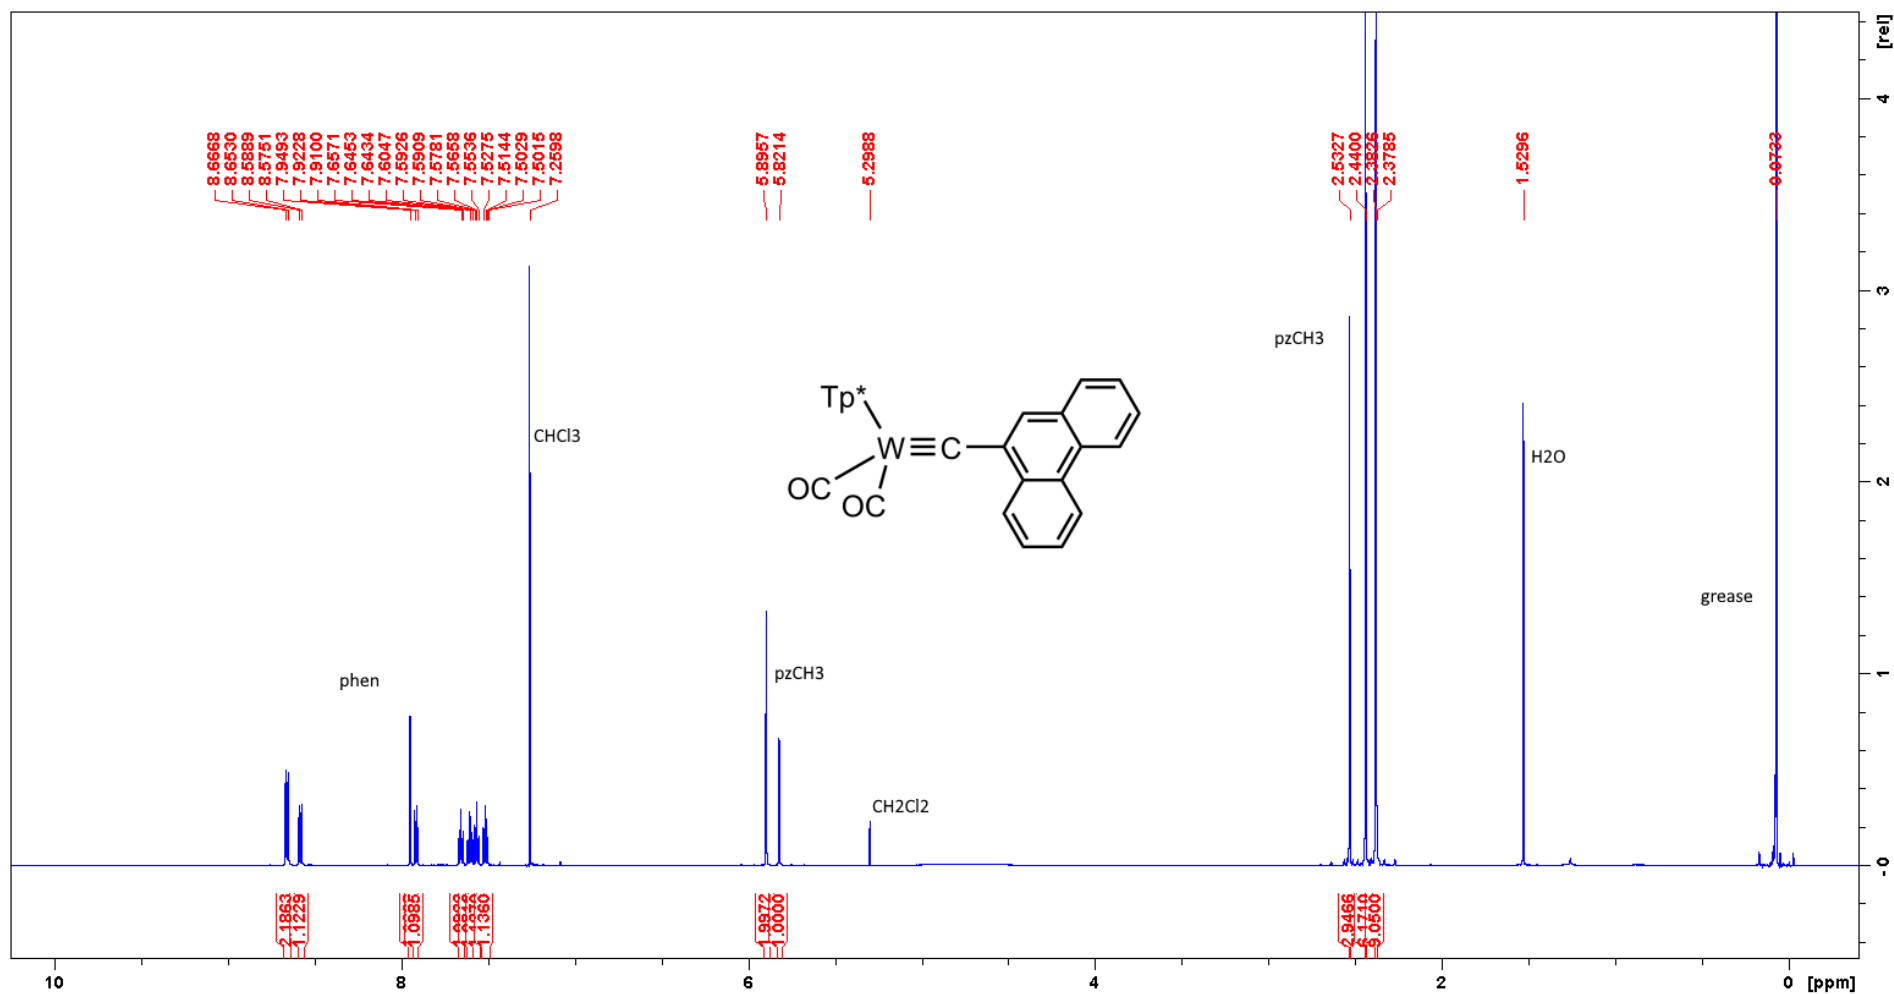

$^1\text{H}$  NMR spectrum (600 MHz,  $\text{CDCl}_3$ , 298 K) for  $[9-\{(\text{Tp}^*)(\text{CO})_2\text{W}\equiv\text{C}\}\text{C}_{14}\text{H}_9] \mathbf{8} \cdot (\text{CH}_2\text{Cl}_2)_{0.5}$ .

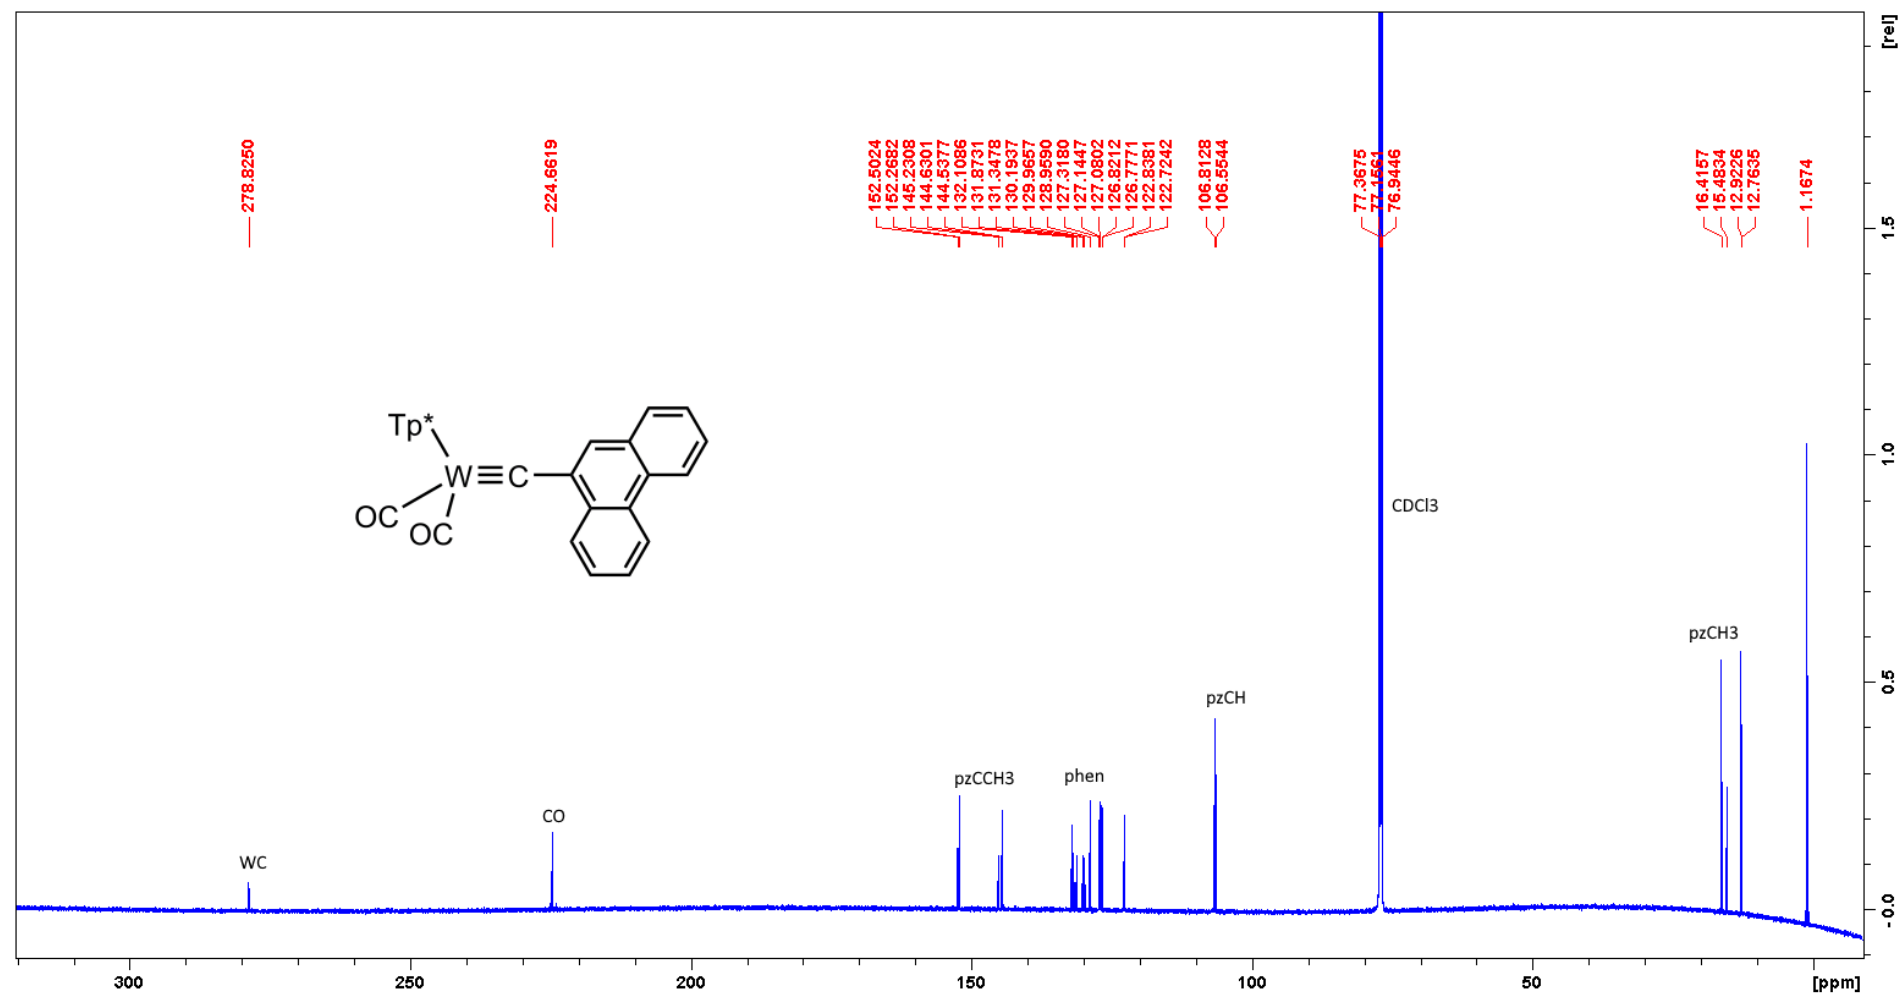

$^{13}\text{C}\{^1\text{H}\}$  NMR spectrum (151 MHz,  $\text{CDCl}_3$ , 298 K) for  $[9\text{-}(\text{Tp}^*)(\text{CO})_2\text{W}\equiv\text{C}]_{\text{C}_{14}\text{H}_9} \mathbf{8} \cdot (\text{CH}_2\text{Cl}_2)_{0.5}$ .

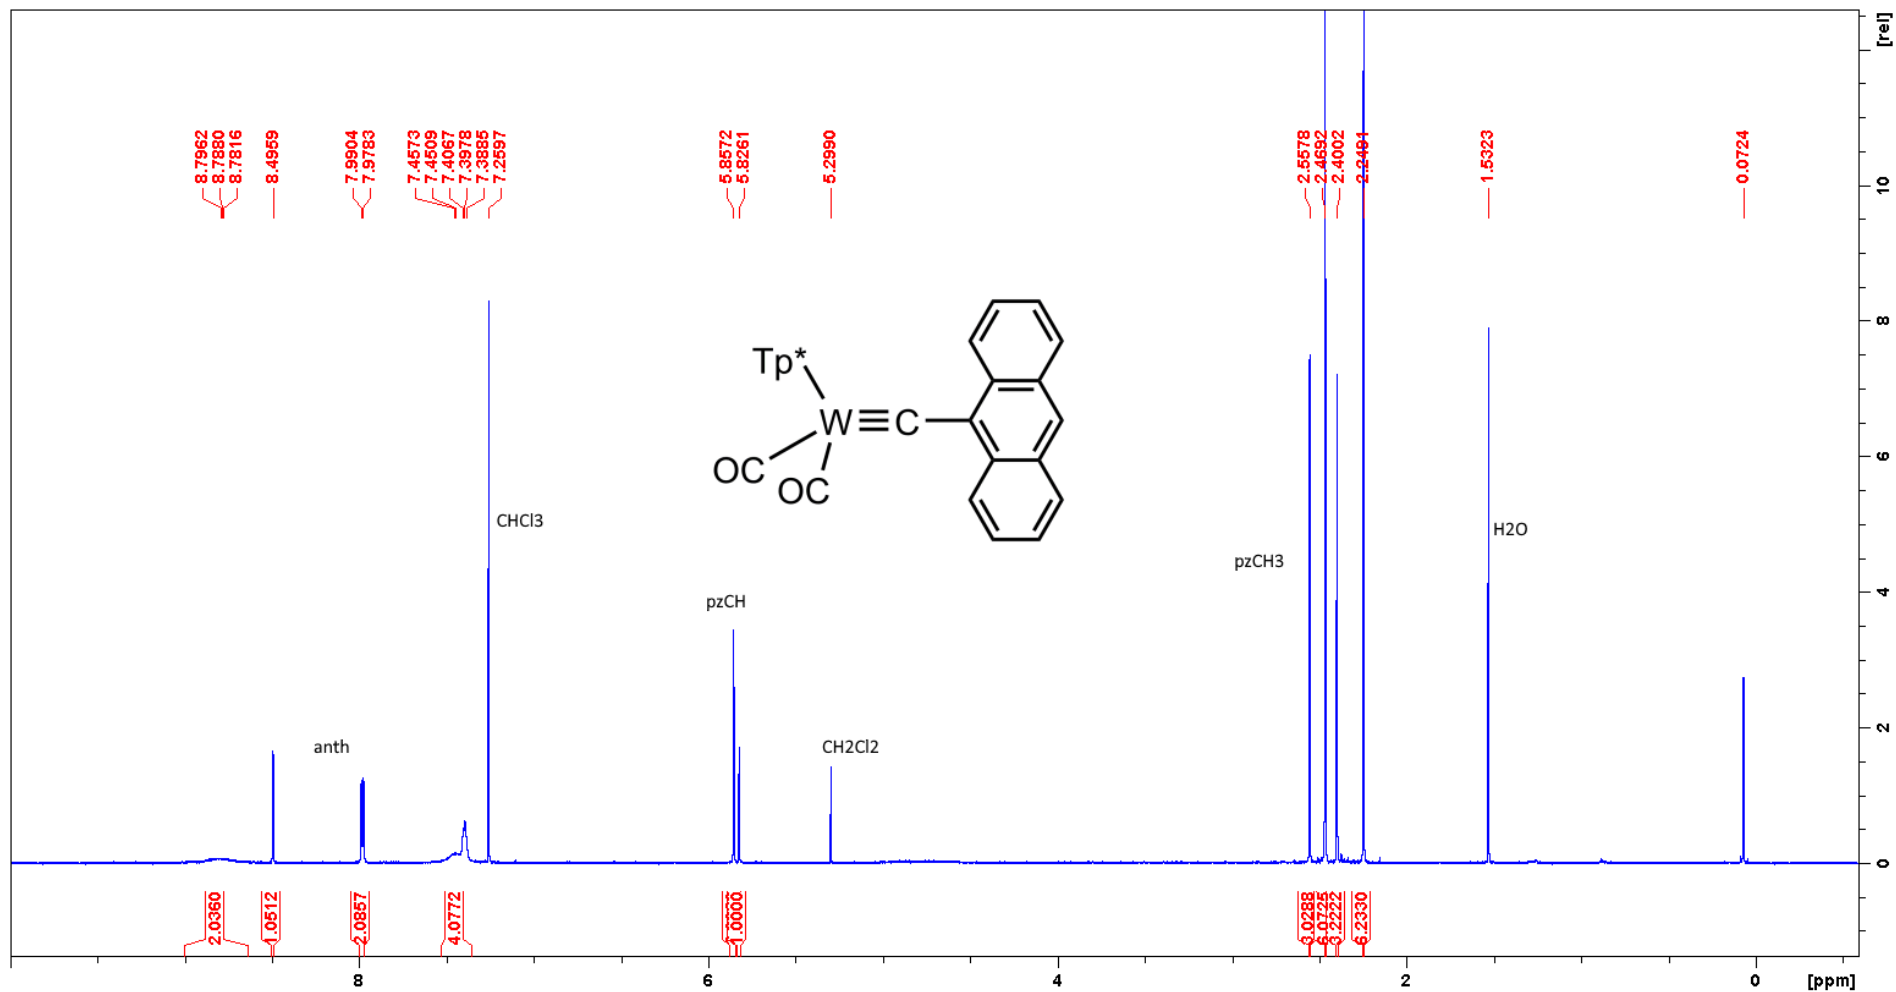

$^1\text{H}$  NMR spectrum (700 MHz,  $\text{CDCl}_3$ , 298 K) for  $[9\text{-}(\text{Tp}^*)(\text{CO})_2\text{W}\equiv\text{C}]_{\text{C}_{14}\text{H}_9}$   $9\text{-}(\text{CH}_2\text{Cl})_{0.33}$ .

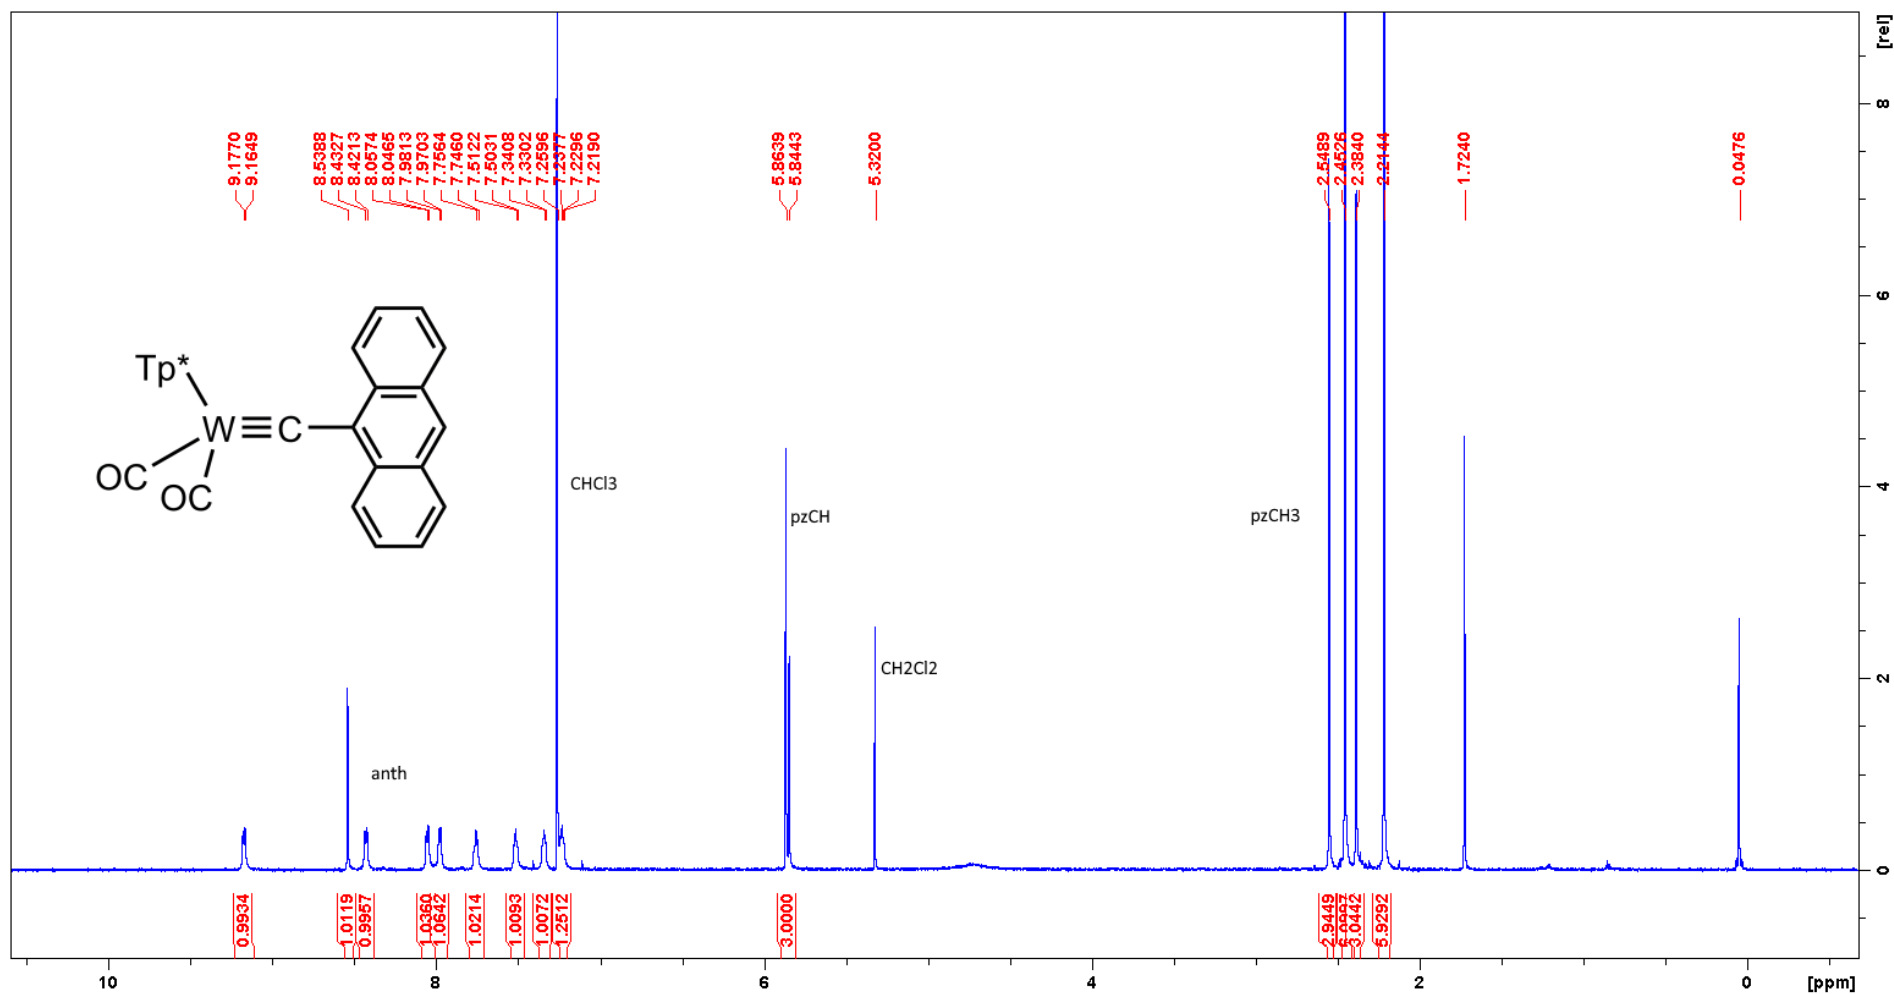

$^1\text{H}$  NMR spectrum (700 MHz,  $\text{CDCl}_3$ , 223 K) for  $[9-(\text{Tp}^*)(\text{CO})_2\text{W}\equiv\text{C}]_{\text{C}_{14}\text{H}_9}$   $\mathbf{9} \cdot (\text{CH}_2\text{Cl}_2)_{0.33}$ .

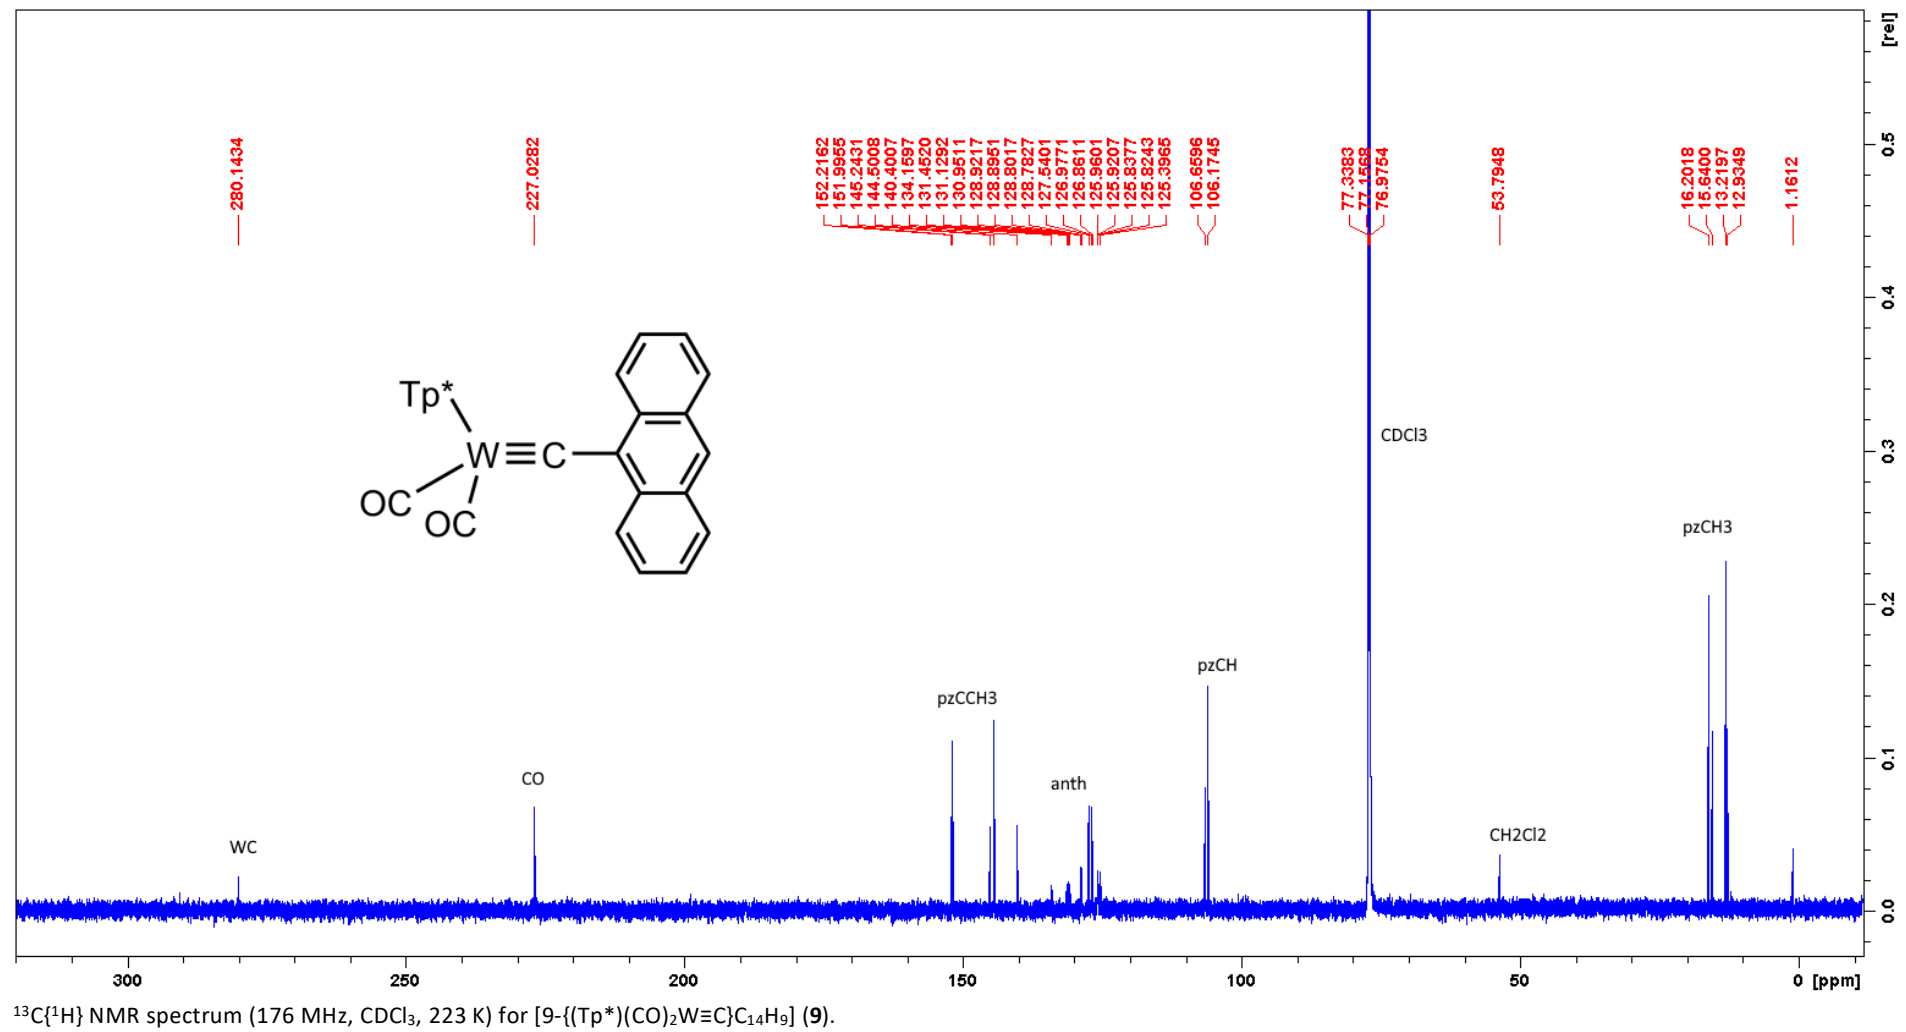



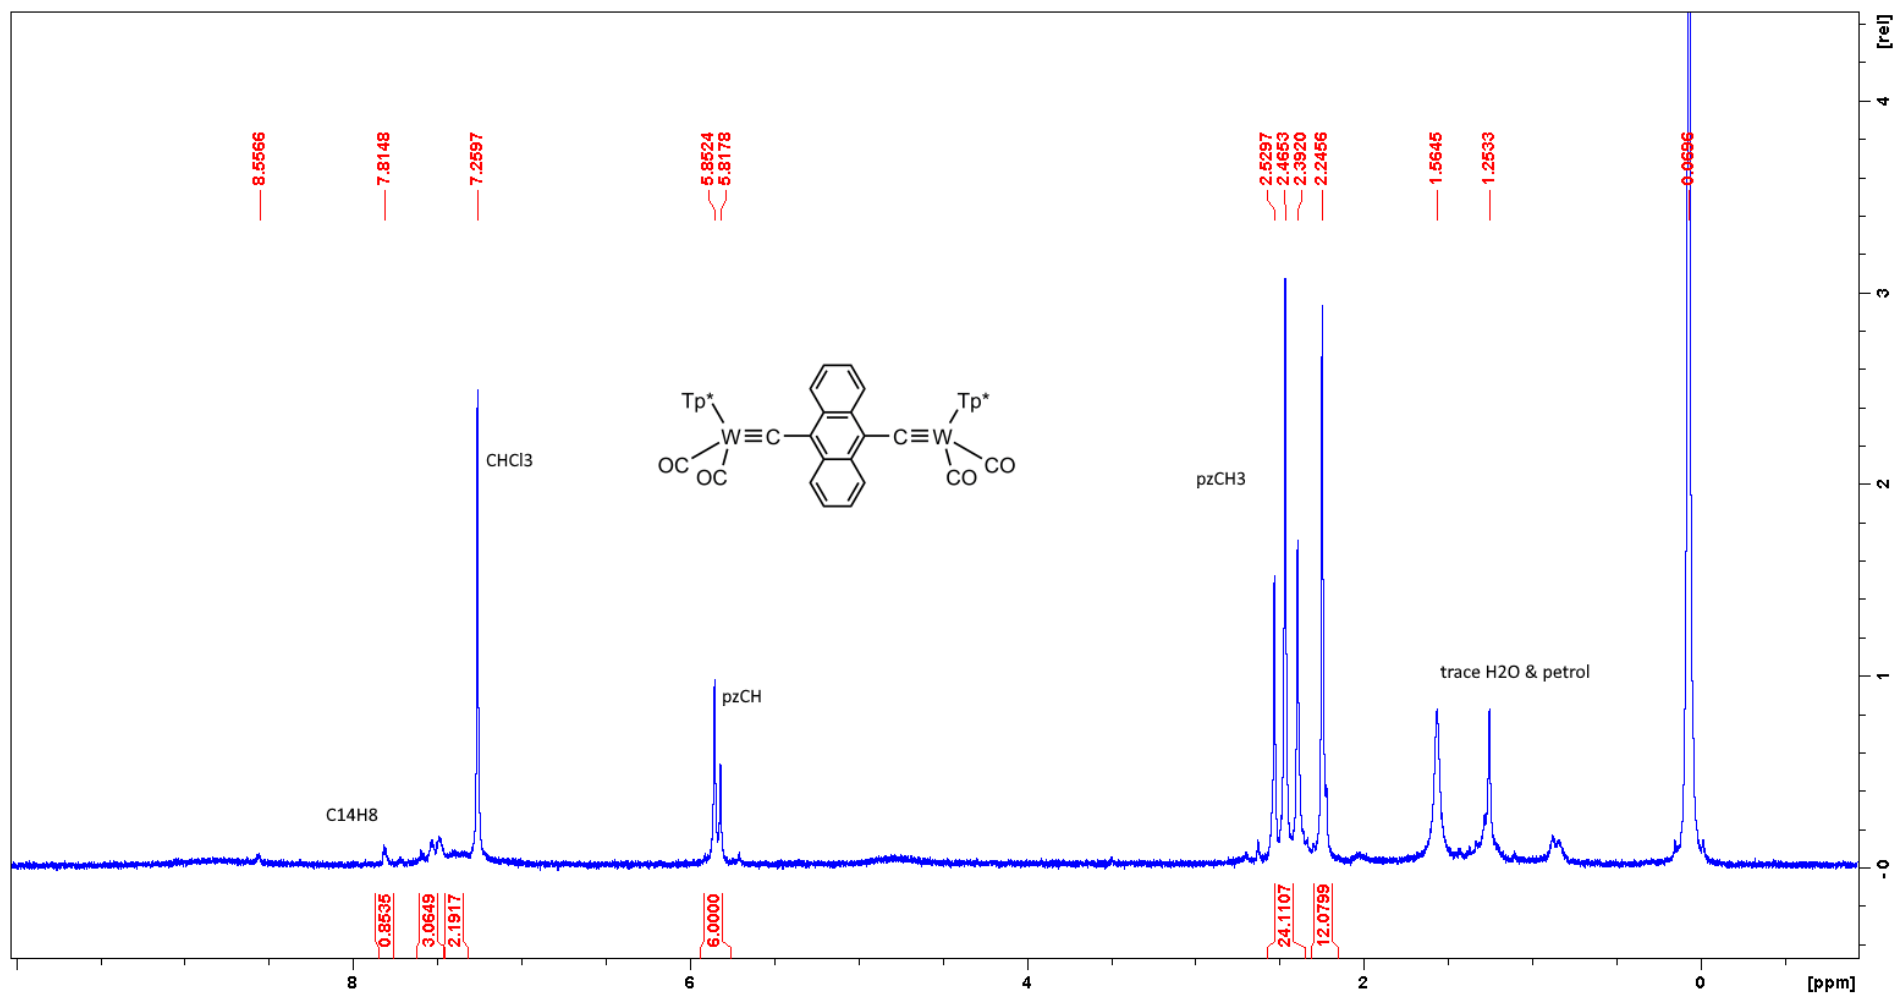

$^1\text{H}$  NMR spectrum (700 MHz,  $\text{CDCl}_3$ , 298 K) for  $[9,10\text{-}(\text{Tp}^*)(\text{CO})_2\text{W}\equiv\text{C}]_2\text{C}_{14}\text{H}_8$  (**10**).

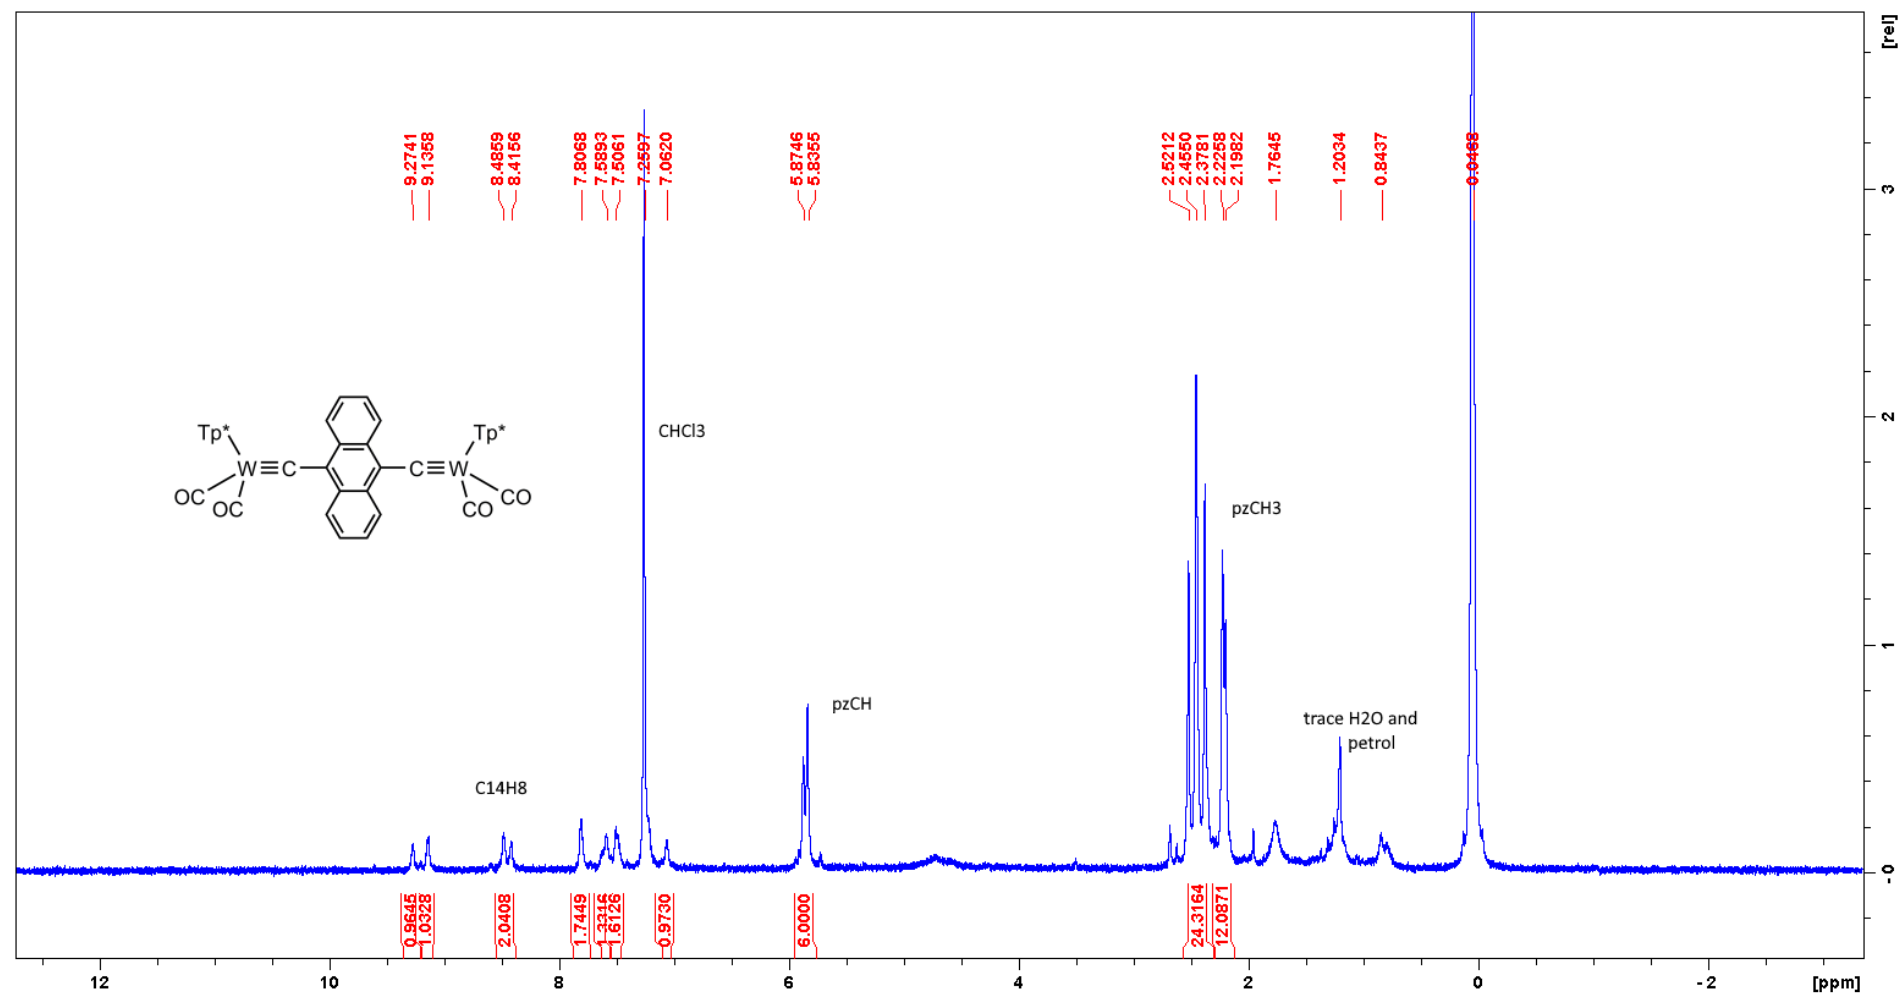

<sup>1</sup>H NMR spectrum (700 MHz, CDCl<sub>3</sub>, 223 K) for [9,10-((Tp\*)(CO)<sub>2</sub>W≡C)<sub>2</sub>C<sub>14</sub>H<sub>8</sub>] **10**·2.5(CHCl<sub>3</sub>).

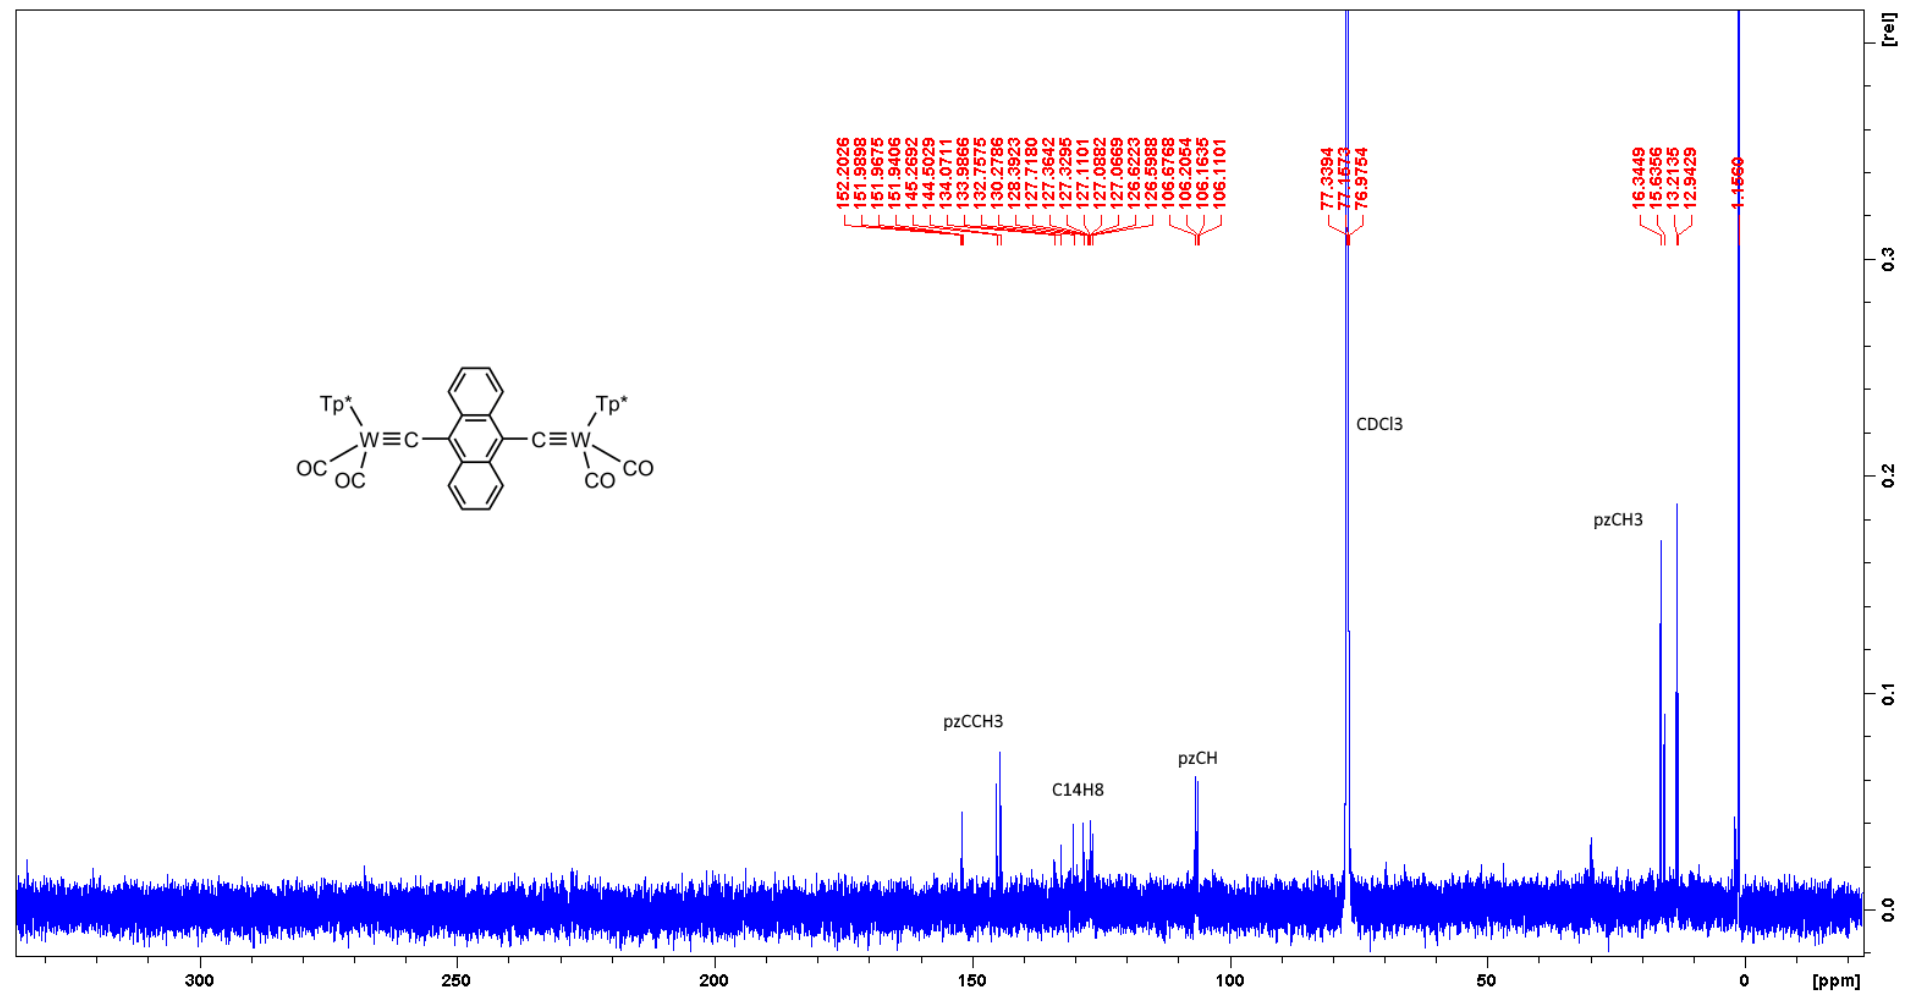

$^{13}\text{C}\{^1\text{H}\}$  NMR spectrum (176 MHz,  $\text{CDCl}_3$ , 298 K) for  $[9,10\text{-}(\text{Tp}^*)(\text{CO})_2\text{W}\equiv\text{C}]_2\text{C}_{14}\text{H}_8$  **10**·2.5( $\text{CHCl}_3$ ).

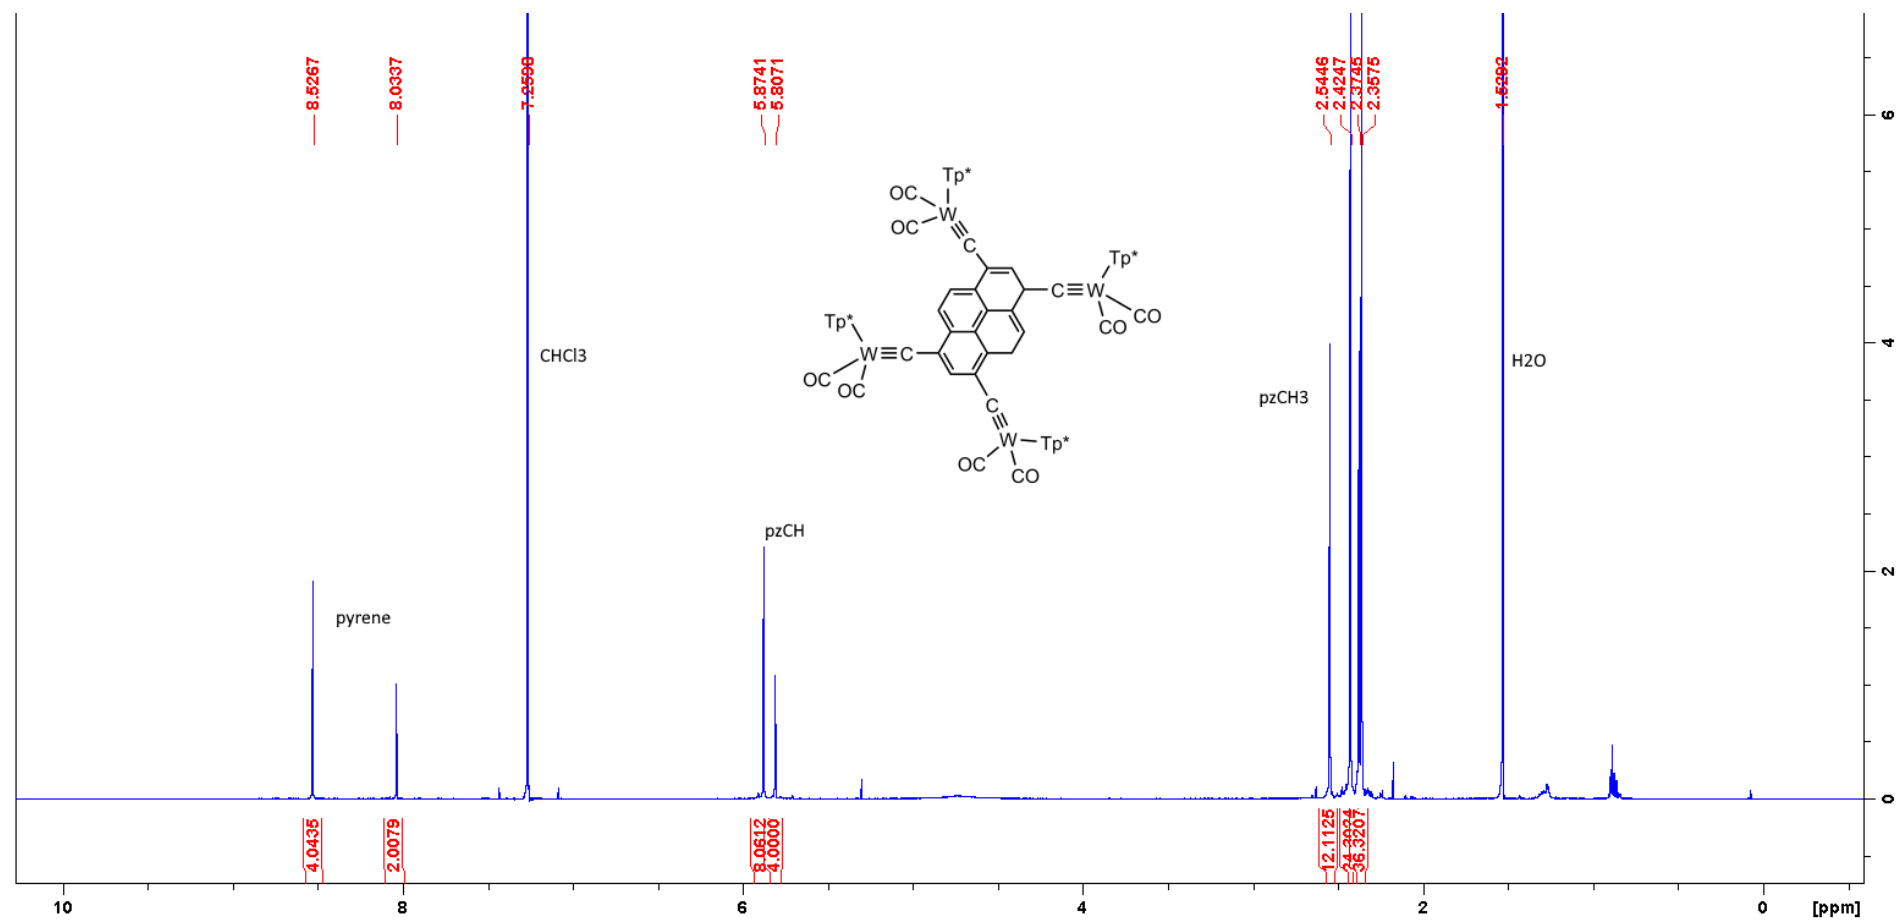

$^1\text{H}$  NMR spectrum (600 MHz,  $\text{CDCl}_3$ , 298 K) for  $[1,3,6,8-((\text{Tp}^*)(\text{CO})_2\text{W}\equiv\text{C})_4\text{C}_{16}\text{H}_6]$  (**11**).

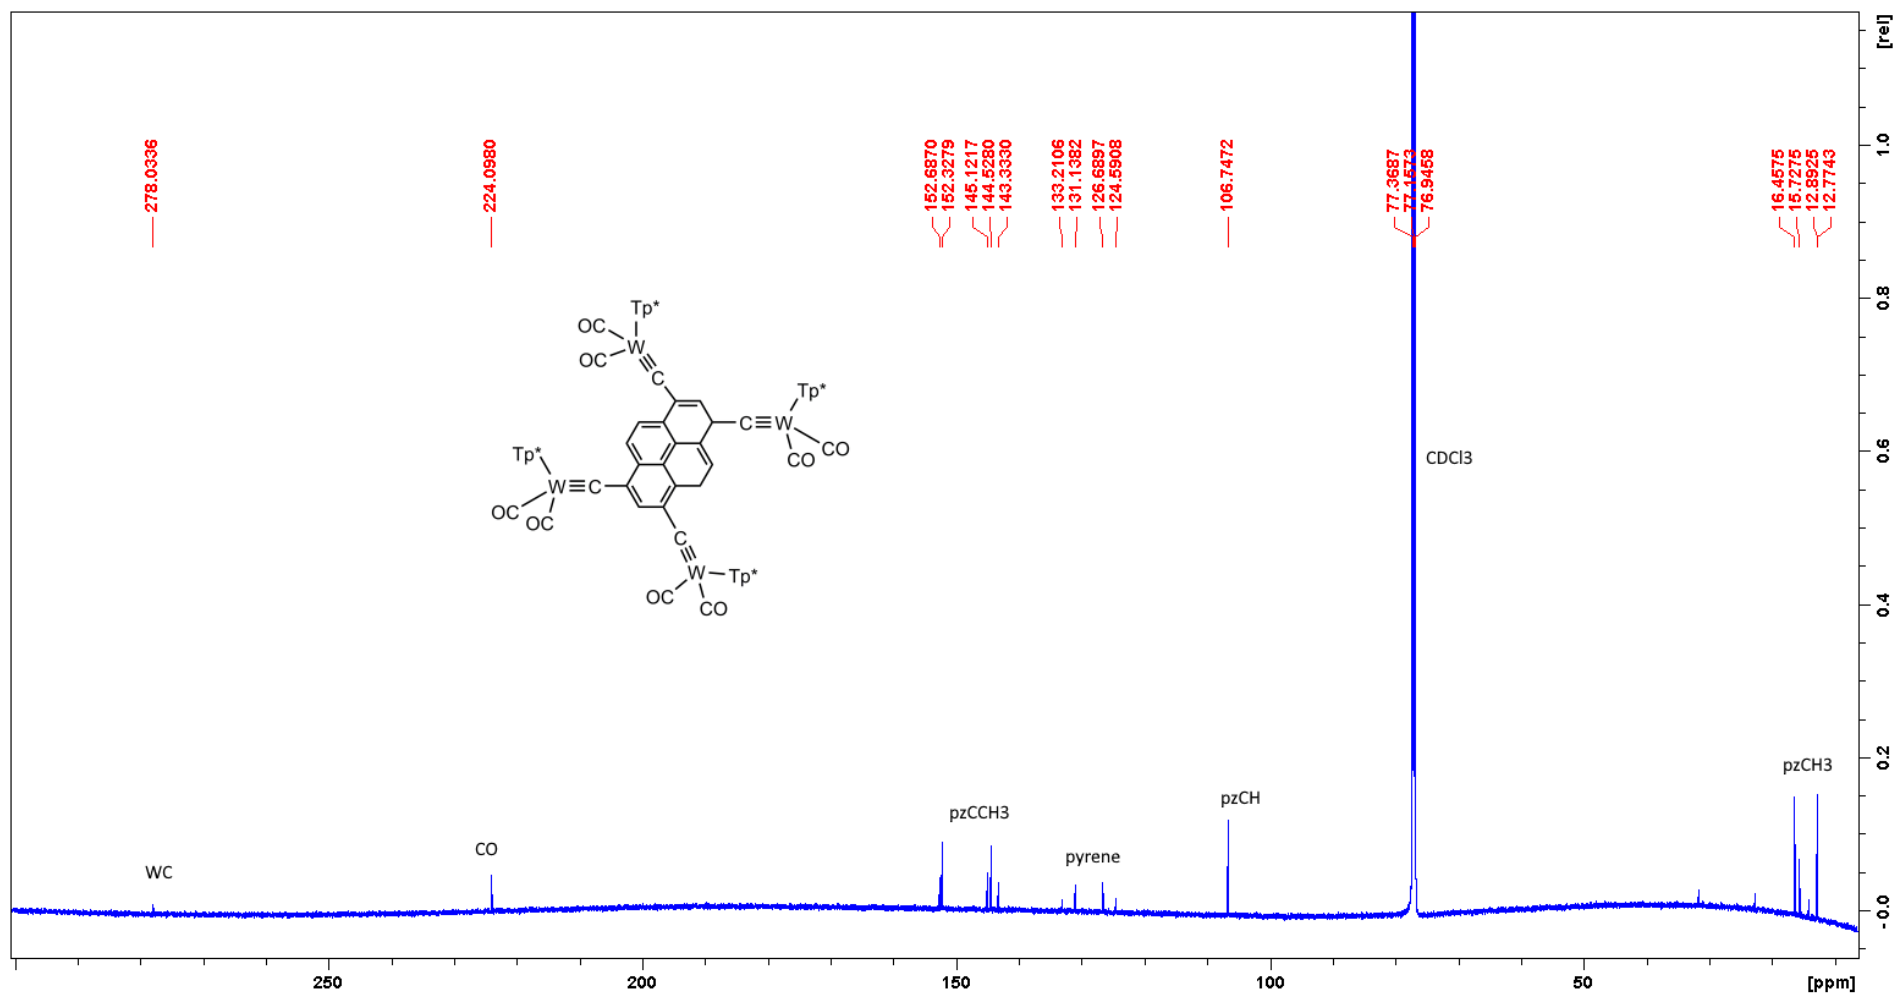

$^{13}\text{C}\{^1\text{H}\}$  NMR spectrum (151 MHz,  $\text{CDCl}_3$ , 298 K) for [1,3,6,8- $\{(\text{Tp}^*)(\text{CO})_2\text{W}=\text{C}\}_4\text{C}_{16}\text{H}_6$ ] (**11**).

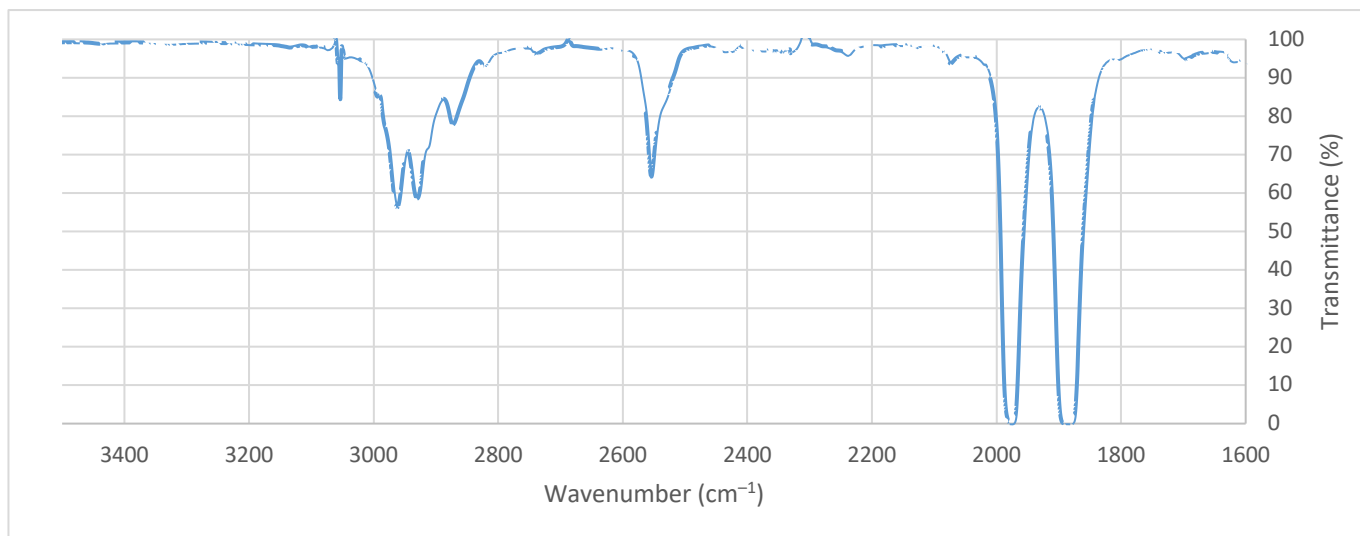IR spectrum (CH<sub>2</sub>Cl<sub>2</sub>, cm<sup>-1</sup>) for [W(≡CC<sub>6</sub>H<sub>4</sub>Br-2)(CO)<sub>2</sub>(Tp<sup>\*</sup>)] (**2**).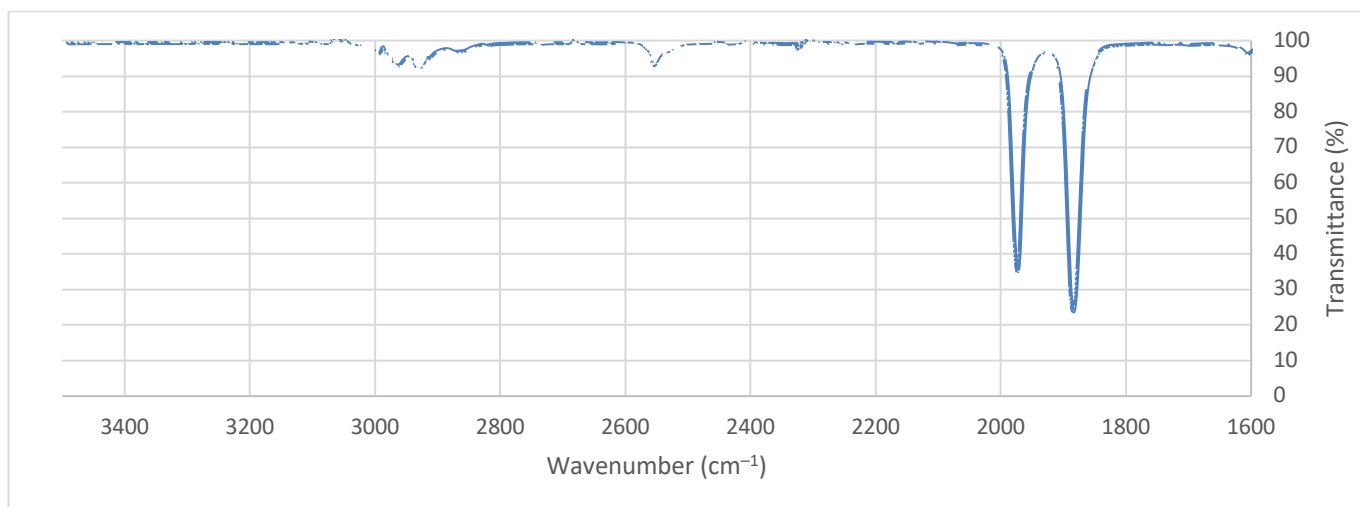IR spectrum (CH<sub>2</sub>Cl<sub>2</sub>, cm<sup>-1</sup>) for [1,3-((Tp<sup>\*</sup>)(CO)<sub>2</sub>W≡C)<sub>2</sub>C<sub>6</sub>H<sub>4</sub>] (**3**).

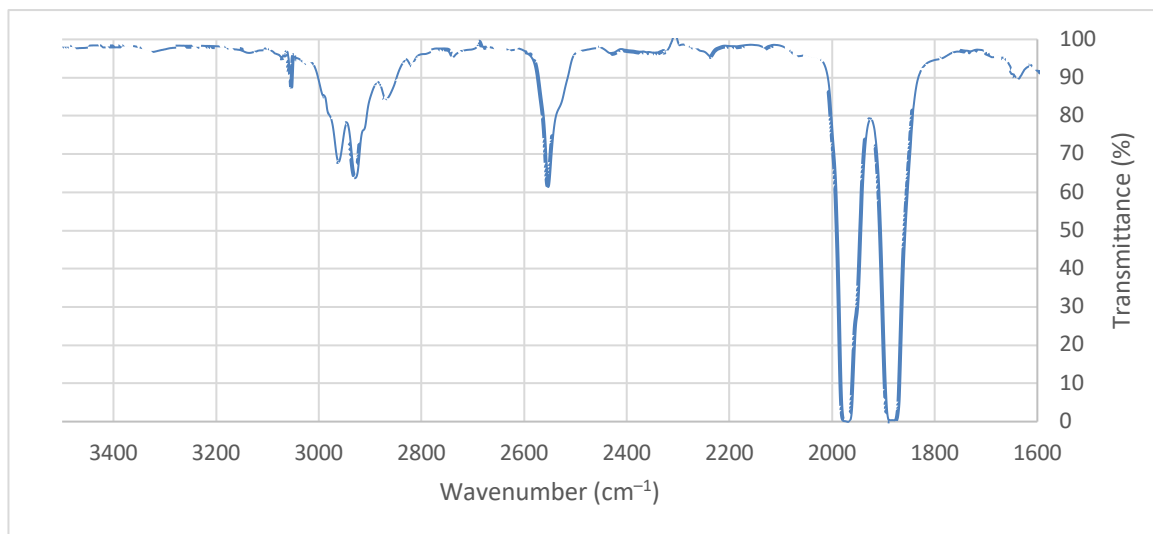

IR spectrum (CH<sub>2</sub>Cl<sub>2</sub>, cm<sup>-1</sup>) for [1,4-((Tp\*)<sub>2</sub>(CO)<sub>2</sub>W≡C)<sub>2</sub>C<sub>6</sub>H<sub>4</sub>] (**4**).

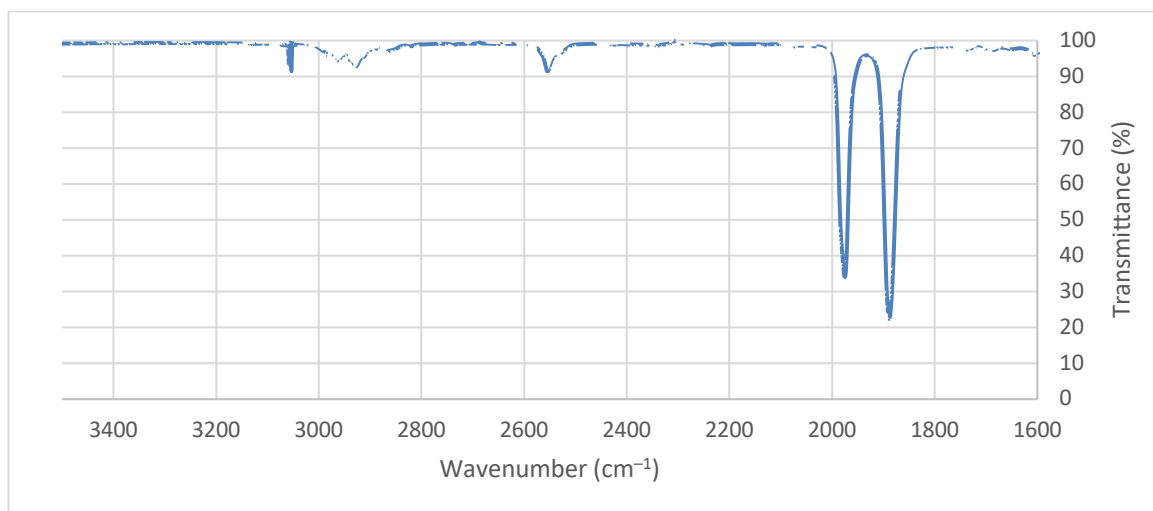

IR spectrum (CH<sub>2</sub>Cl<sub>2</sub>, cm<sup>-1</sup>) for [1,3,5-((Tp\*)<sub>2</sub>(CO)<sub>2</sub>W≡C)<sub>3</sub>C<sub>6</sub>H<sub>4</sub>] (**5**).

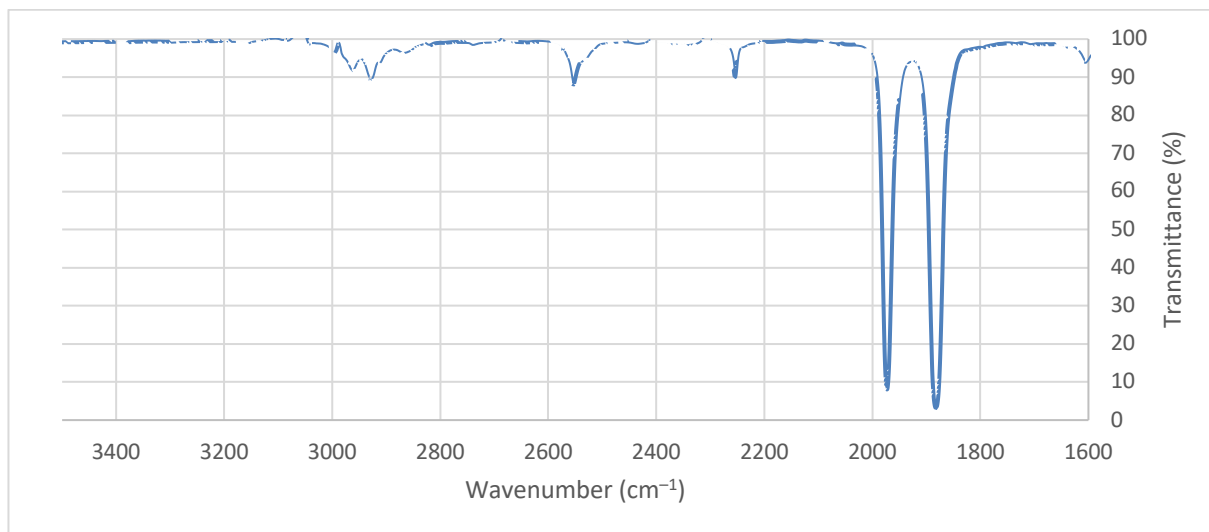

IR spectrum (CH<sub>2</sub>Cl<sub>2</sub>, cm<sup>-1</sup>) for [1-((Tp\*)<sub>2</sub>(CO)<sub>2</sub>W≡C)C<sub>10</sub>H<sub>7</sub>] (**6**).

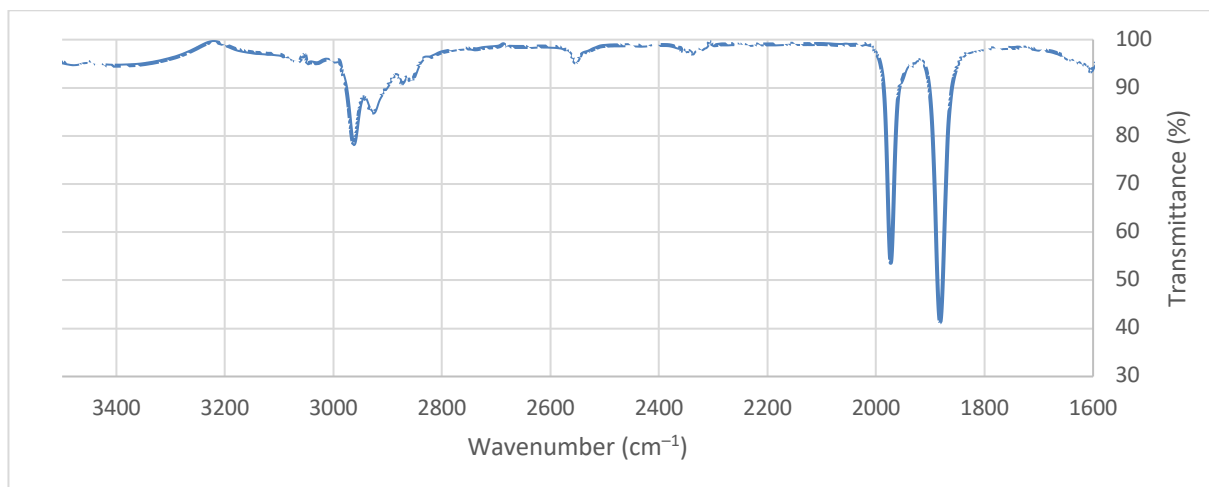

IR spectrum (CH<sub>2</sub>Cl<sub>2</sub>, cm<sup>-1</sup>) for [2-((Tp\*)<sub>2</sub>(CO)<sub>2</sub>W≡C)C<sub>10</sub>H<sub>7</sub>] (**7**).



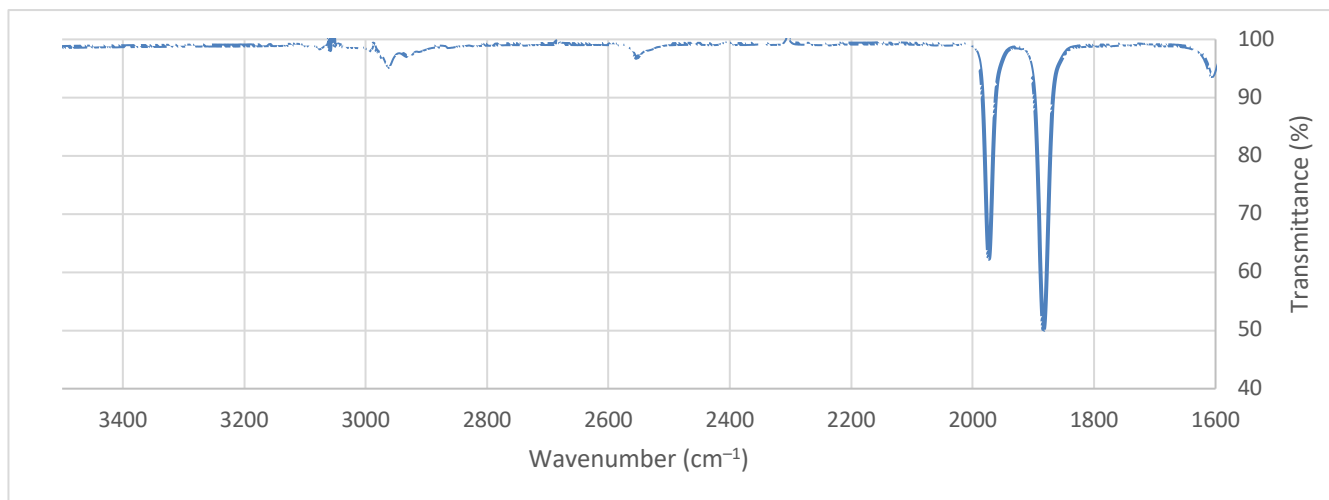

IR spectrum (CH<sub>2</sub>Cl<sub>2</sub>, cm<sup>-1</sup>) for [9-((Tp\*)<sub>2</sub>(CO)<sub>2</sub>W≡C)C<sub>14</sub>H<sub>9</sub>] (**8**).

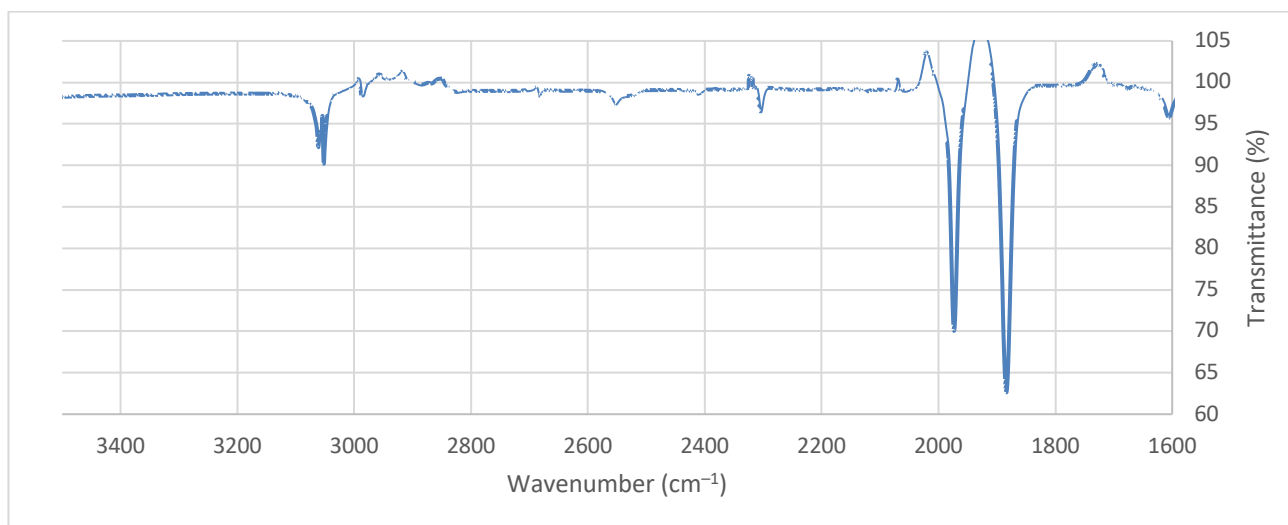

IR spectrum (CH<sub>2</sub>Cl<sub>2</sub>, cm<sup>-1</sup>) for [9-((Tp\*)<sub>2</sub>(CO)<sub>2</sub>W≡C)C<sub>14</sub>H<sub>9</sub>] (**9**).

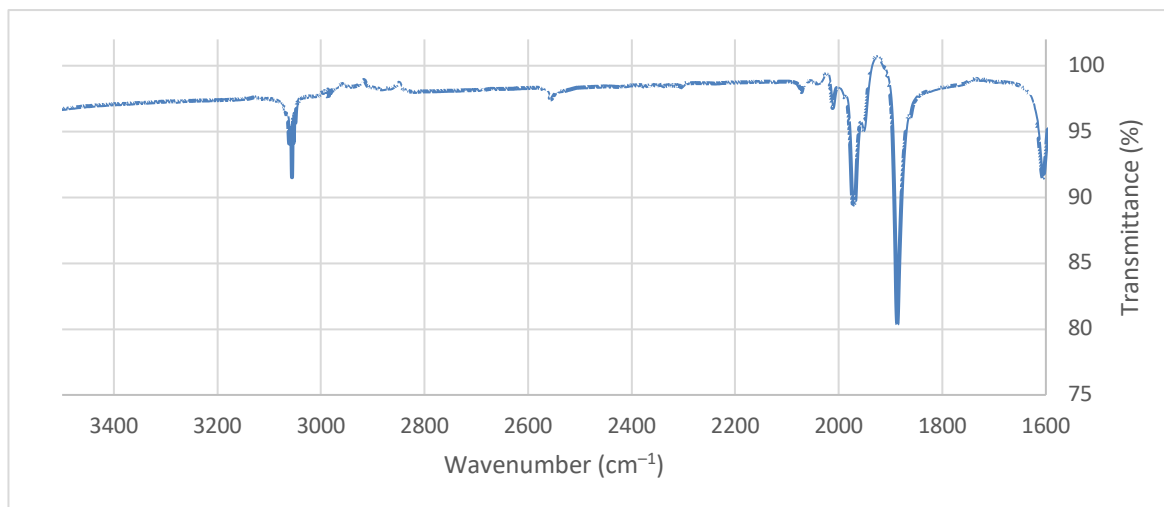

IR spectrum (CH<sub>2</sub>Cl<sub>2</sub>, cm<sup>-1</sup>) for [9,10-((Tp\*)<sub>2</sub>(CO)<sub>2</sub>W≡C)<sub>2</sub>C<sub>14</sub>H<sub>8</sub>] (**10**).

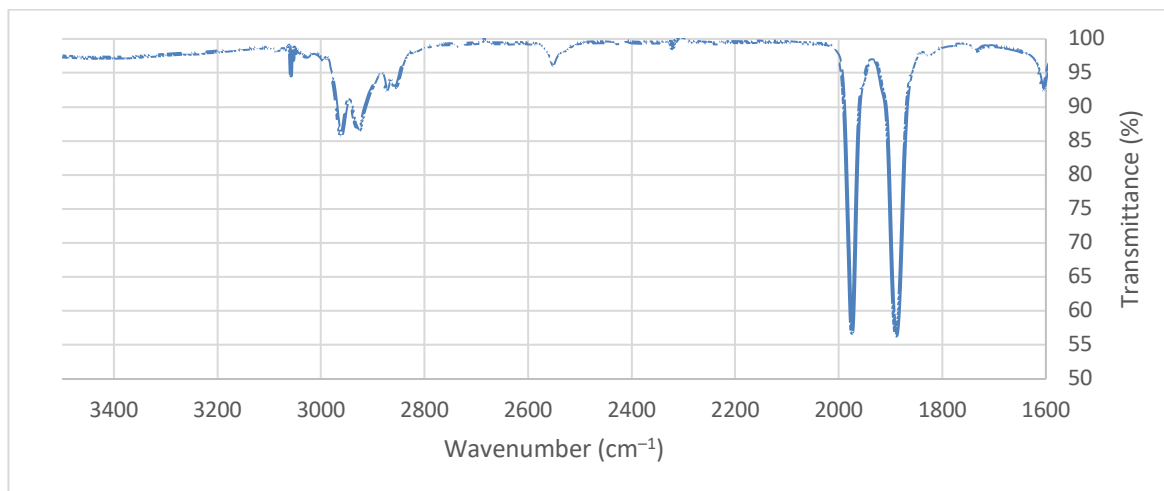

IR spectrum (CH<sub>2</sub>Cl<sub>2</sub>, cm<sup>-1</sup>) for [1,3,6,8-((Tp\*)<sub>2</sub>(CO)<sub>2</sub>W≡C)<sub>4</sub>C<sub>16</sub>H<sub>6</sub>] (**11**).

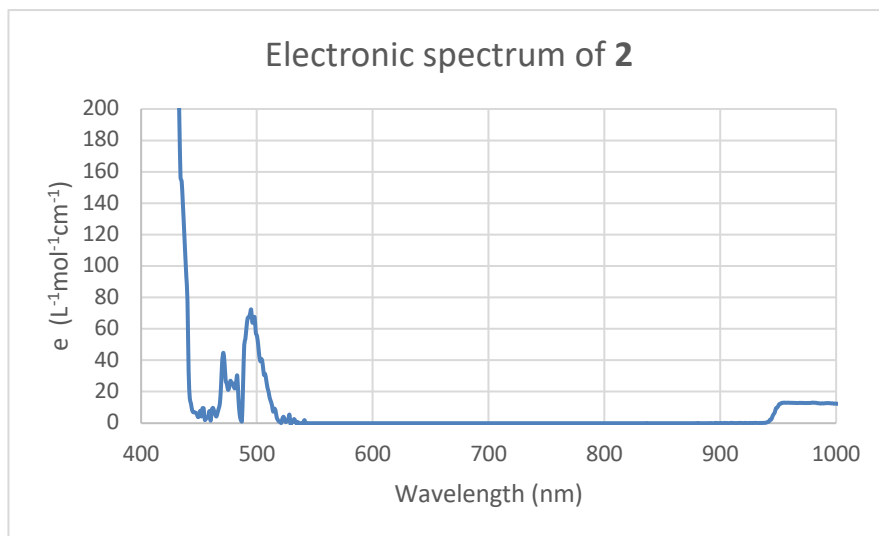

Electronic spectrum ( $\text{CH}_2\text{Cl}_2$ ,  $\text{cm}^{-1}$ ) of  $[\text{W}(\equiv\text{CC}_6\text{H}_4\text{Br}-2)(\text{CO})_2(\text{Tp}^*)]$  (**2**).

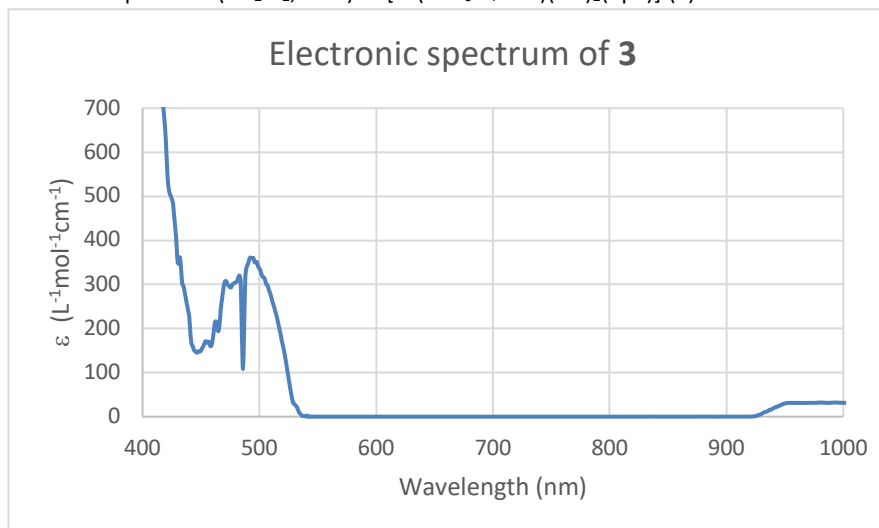

Electronic spectrum ( $\text{CH}_2\text{Cl}_2$ ,  $\text{cm}^{-1}$ ) of  $[1,3\text{-}(\text{Tp}^*)(\text{CO})_2\text{W}\equiv\text{C}]_2\text{C}_6\text{H}_4$  (**3**).

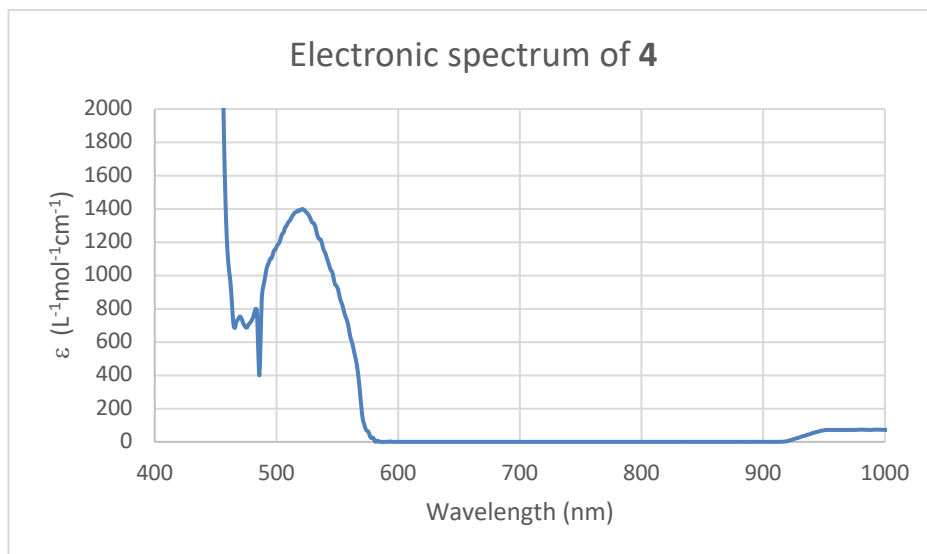

UV-Vis spectrum ( $\text{CH}_2\text{Cl}_2$ ,  $\text{cm}^{-1}$ ) for [1,4- $\{(\text{Tp}^*)(\text{CO})_2\text{W}\equiv\text{C}\}_2\text{C}_6\text{H}_4$ ] (**4**).

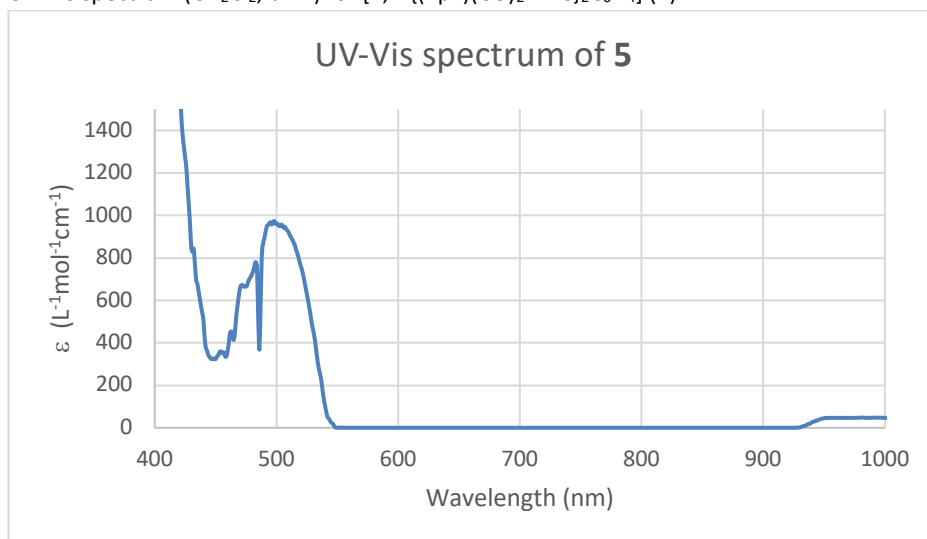

Electronic spectrum ( $\text{CH}_2\text{Cl}_2$ ,  $\text{cm}^{-1}$ ) of [1,3,5- $\{(\text{Tp}^*)(\text{CO})_2\text{W}\equiv\text{C}\}_3\text{C}_6\text{H}_4$ ] (**5**).

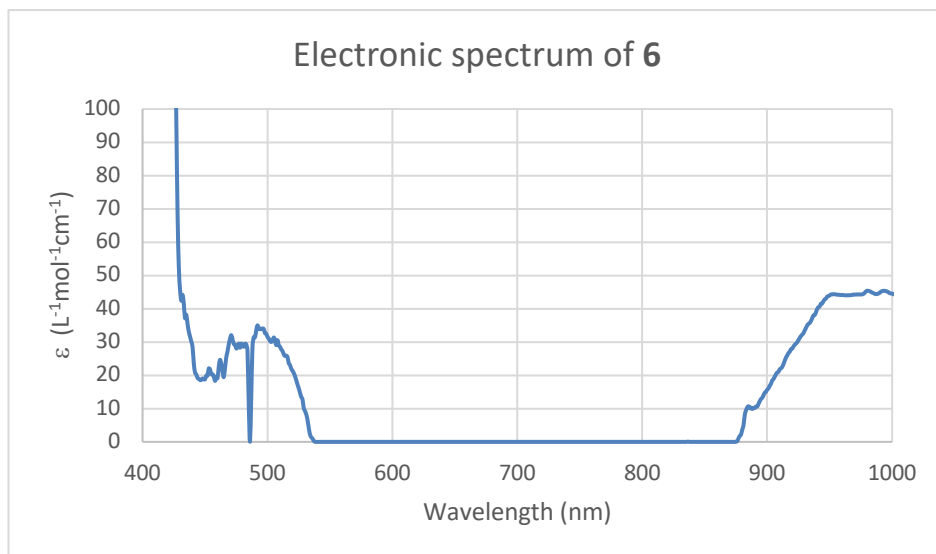Electronic spectrum ( $\text{CH}_2\text{Cl}_2$ ,  $\text{cm}^{-1}$ ) for [1- $\{(\text{Tp}^*)(\text{CO})_2\text{W}\equiv\text{C}\}$ ]C<sub>10</sub>H<sub>7</sub>] (**6**).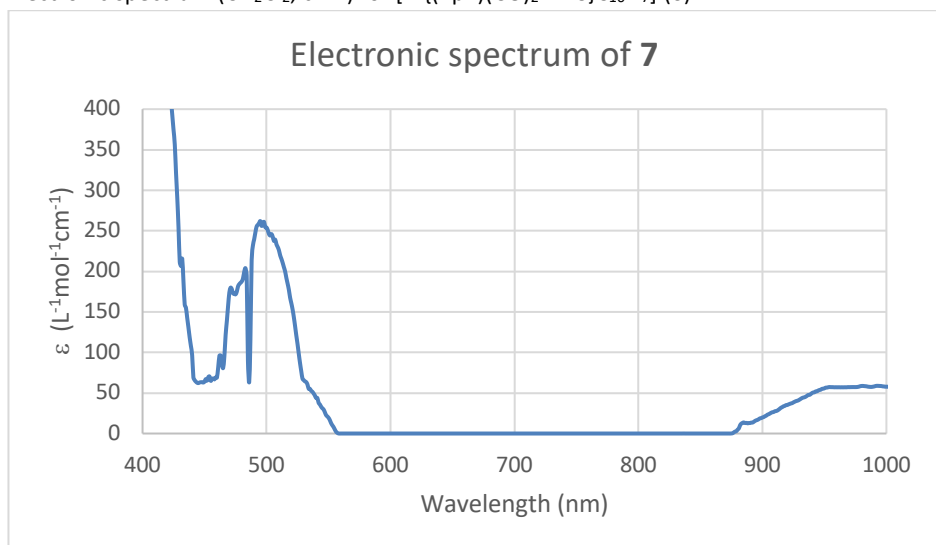Electronic spectrum ( $\text{CH}_2\text{Cl}_2$ ,  $\text{cm}^{-1}$ ) for [2- $\{(\text{Tp}^*)(\text{CO})_2\text{W}\equiv\text{C}\}$ ]C<sub>10</sub>H<sub>7</sub>] (**7**).

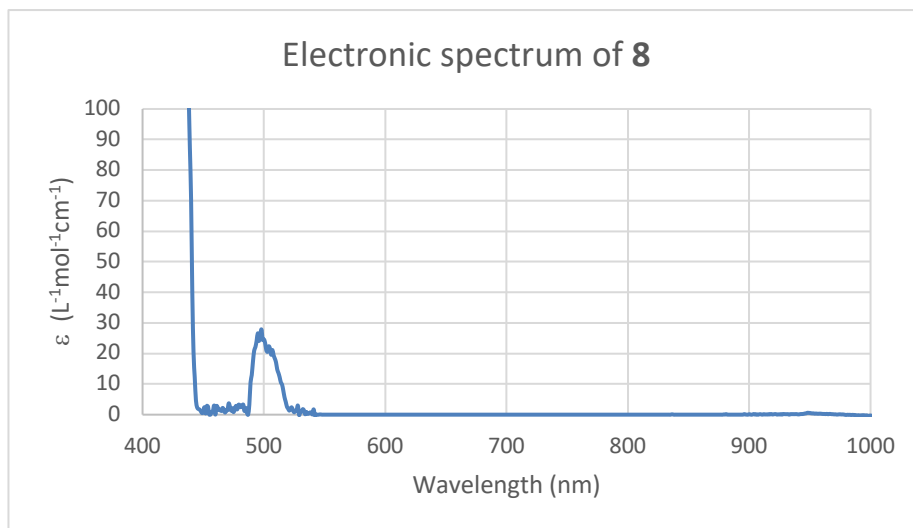

Electronic spectrum ( $\text{CH}_2\text{Cl}_2$ ,  $\text{cm}^{-1}$ ) for  $[9\text{-}\{\text{Tp}^*\}(\text{CO})_2\text{W}\equiv\text{C}\}\text{C}_{14}\text{H}_9]$  (**8**).

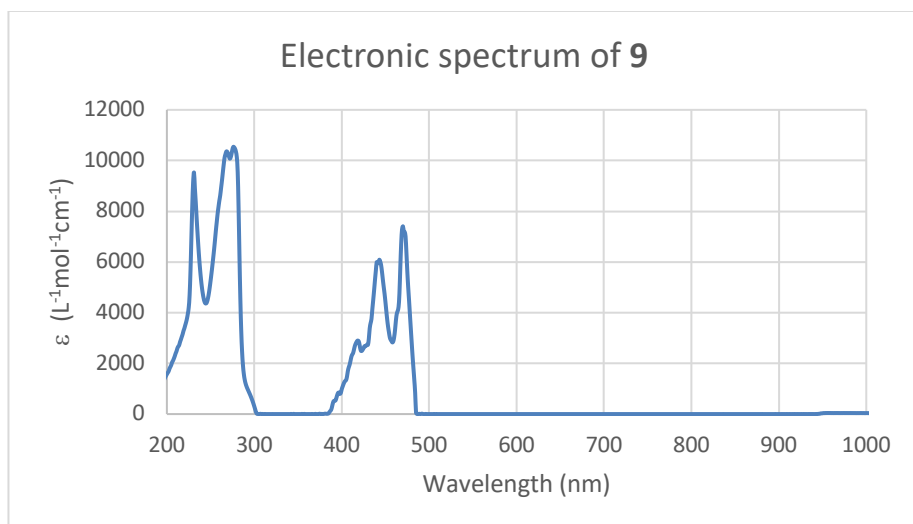

Electronic spectrum ( $\text{CH}_2\text{Cl}_2$ ,  $\text{cm}^{-1}$ ) for  $[9\text{-}\{\text{Tp}^*\}(\text{CO})_2\text{W}\equiv\text{C}\}\text{C}_{14}\text{H}_9]$  (**9**).

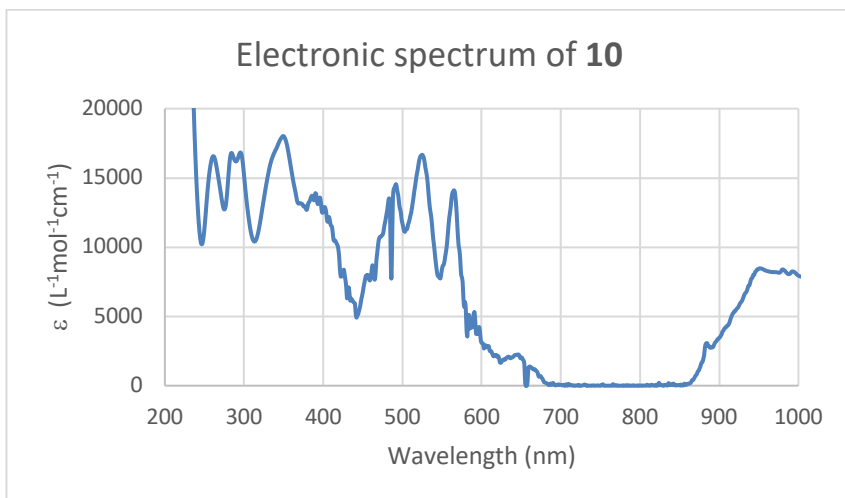

Electronic spectrum ( $\text{CH}_2\text{Cl}_2$ ,  $\text{cm}^{-1}$ ) for [9,10- $\{(\text{Tp}^*)(\text{CO})_2\text{W}\equiv\text{C}\}_2\text{C}_{14}\text{H}_8$ ] (**10**).

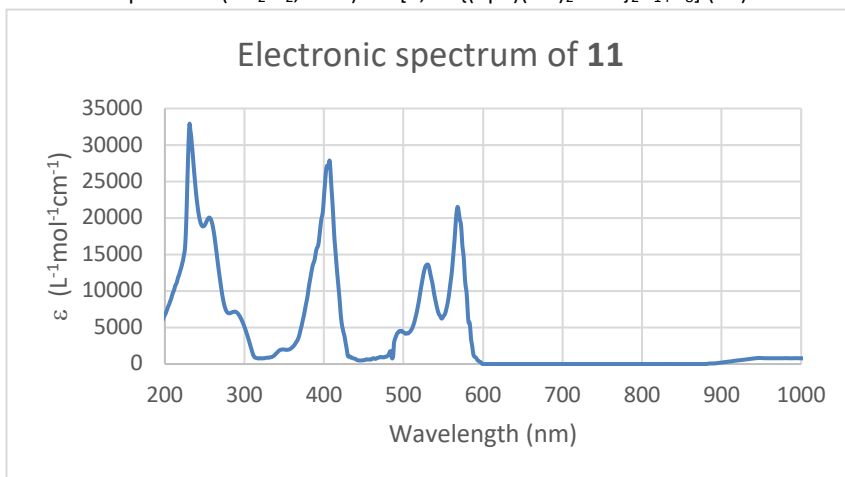

Electronic spectrum ( $\text{CH}_2\text{Cl}_2$ ,  $\text{cm}^{-1}$ ) for [1,3,6,8- $\{(\text{Tp}^*)(\text{CO})_2\text{W}\equiv\text{C}\}_4\text{C}_{16}\text{H}_6$ ] (**11**).

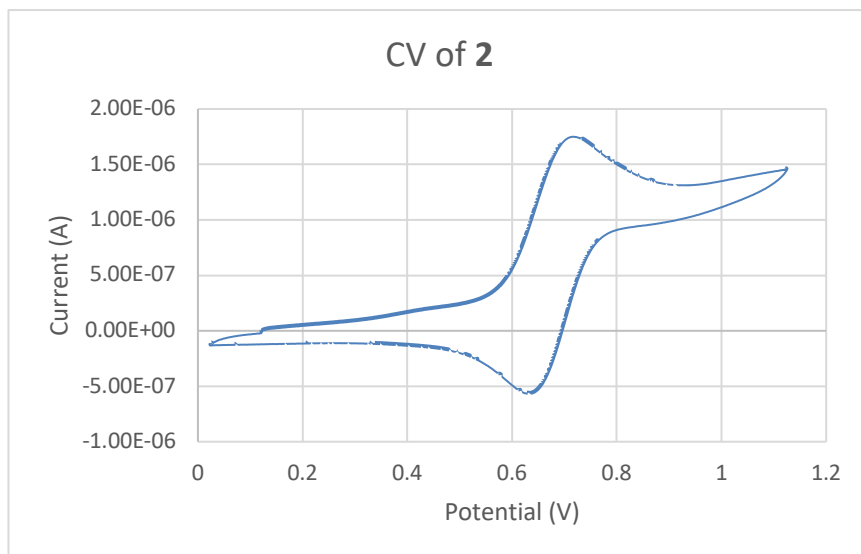

Cyclic Voltammogram ( $\text{CH}_2\text{Cl}_2/[\text{NBu}_4][\text{PF}_6]$  (0.1 M) at  $25^\circ\text{C}$  at  $100\text{ mV s}^{-1}$ ) of  $[2\text{-}\{(\text{Tp}^*)(\text{CO})_2\text{W}\equiv\text{C}\}_2\text{C}_6\text{H}_4\text{Br}]$  (**2**) relative to  $[\text{Fe}(\eta\text{-C}_5\text{H}_5)_2]^{0/+} = 0.460\text{ V}$ .

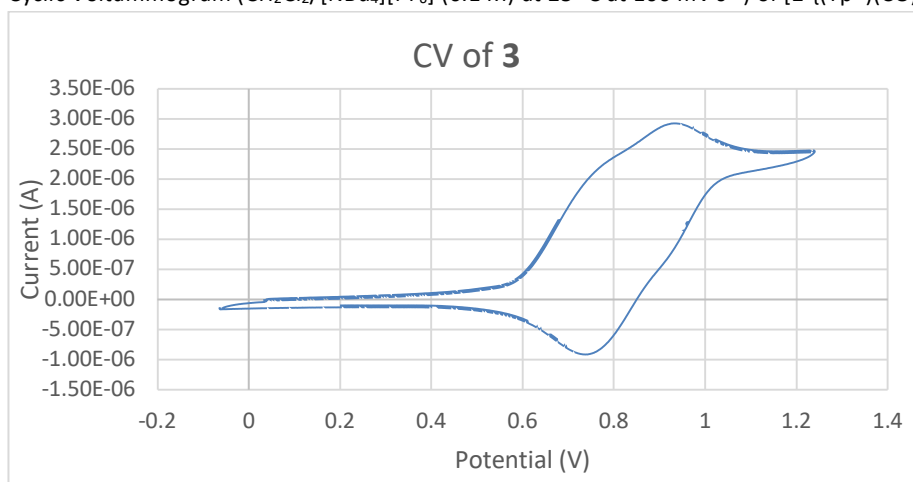

Cyclic Voltammogram ( $\text{CH}_2\text{Cl}_2/[\text{NBu}_4][\text{PF}_6]$  (0.1 M) at  $25^\circ\text{C}$  at  $100\text{ mV s}^{-1}$ ) of  $[1,3\text{-}\{(\text{Tp}^*)(\text{CO})_2\text{W}\equiv\text{C}\}_2\text{C}_6\text{H}_4]$  (**3**) relative to  $[\text{Fe}(\eta\text{-C}_5\text{H}_5)_2]^{0/+} = 0.460\text{ V}$ .



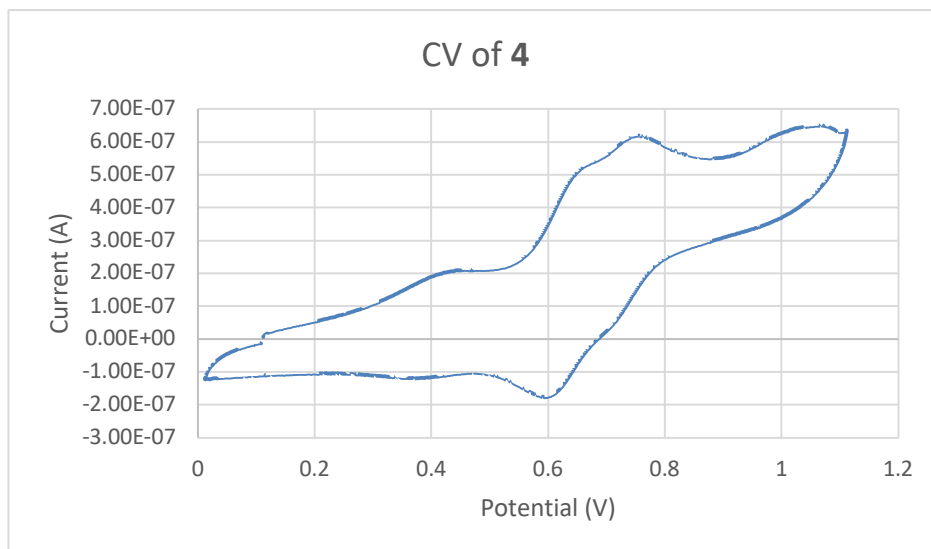

Cyclic Voltammogram ( $\text{CH}_2\text{Cl}_2$ /[NBu<sub>4</sub>][PF<sub>6</sub>] (0.1 M) at 25 °C at 100 mV s<sup>-1</sup>) of [1,4-((Tp\*)<sub>2</sub>(CO)<sub>2</sub>W≡C)<sub>2</sub>C<sub>6</sub>H<sub>4</sub>] (**4**) relative to [Fe(η-C<sub>5</sub>H<sub>5</sub>)<sub>2</sub>]<sup>0/+</sup> = 0.460 V.

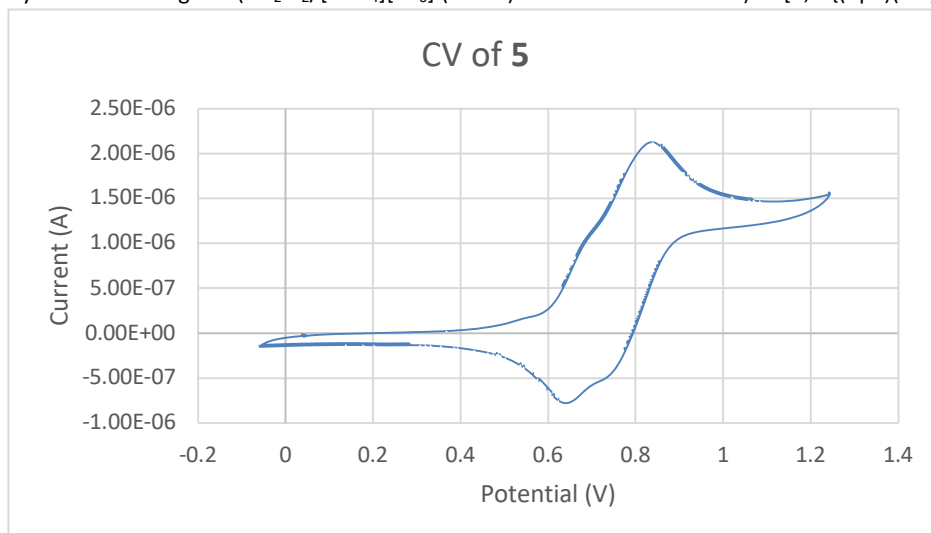

Cyclic Voltammogram ( $\text{CH}_2\text{Cl}_2$ /[NBu<sub>4</sub>][PF<sub>6</sub>] (0.1 M) at 25 °C at 100 mV s<sup>-1</sup>) of [1,3,5-((Tp\*)<sub>2</sub>(CO)<sub>2</sub>W≡C)<sub>3</sub>C<sub>6</sub>H<sub>4</sub>] (**5**) relative to [Fe(η-C<sub>5</sub>H<sub>5</sub>)<sub>2</sub>]<sup>0/+</sup> = 0.460 V.

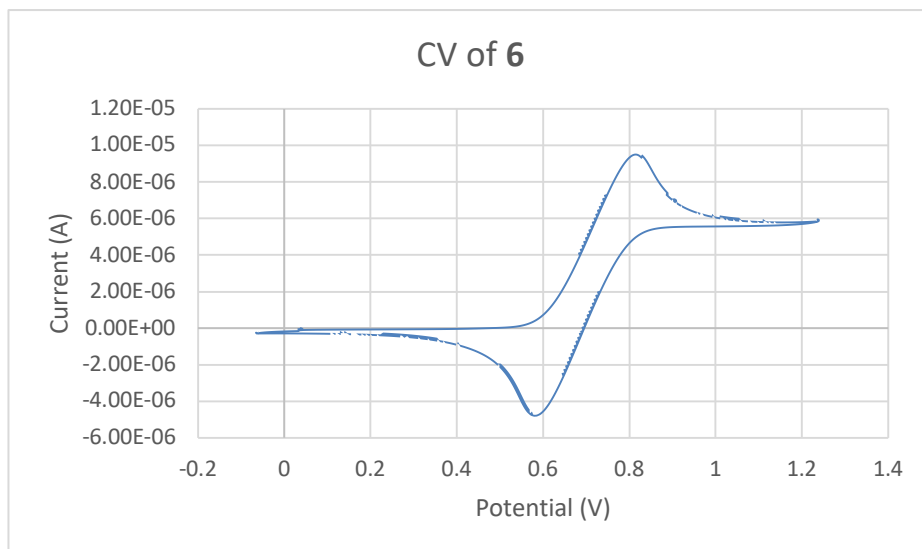

Cyclic Voltammogram ( $\text{CH}_2\text{Cl}_2$ /[NBu<sub>4</sub>][PF<sub>6</sub>] (0.1 M) at 25 °C at 100 mV s<sup>-1</sup>) of [1-(Tp\*)(CO)<sub>2</sub>W≡C]C<sub>10</sub>H<sub>7</sub>] (**6**) relative to [Fe(η-C<sub>5</sub>H<sub>5</sub>)<sub>2</sub>]<sup>0/+</sup> = 0.460 V.

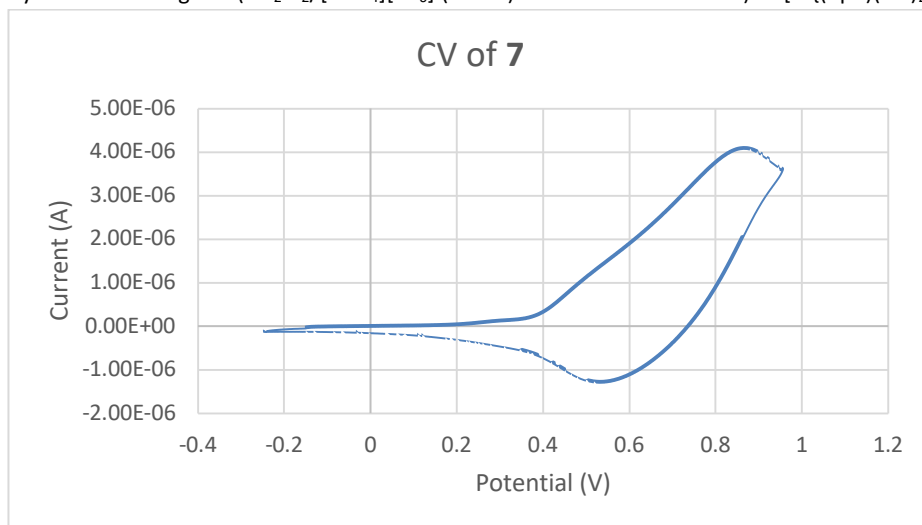

Cyclic Voltammogram ( $\text{CH}_2\text{Cl}_2$ /[NBu<sub>4</sub>][PF<sub>6</sub>] (0.1 M) at 25 °C at 100 mV s<sup>-1</sup>) of [2-(Tp\*)(CO)<sub>2</sub>W≡C]C<sub>10</sub>H<sub>7</sub>] (**7**) relative to [Fe(η-C<sub>5</sub>H<sub>5</sub>)<sub>2</sub>]<sup>0/+</sup> = 0.460 V.

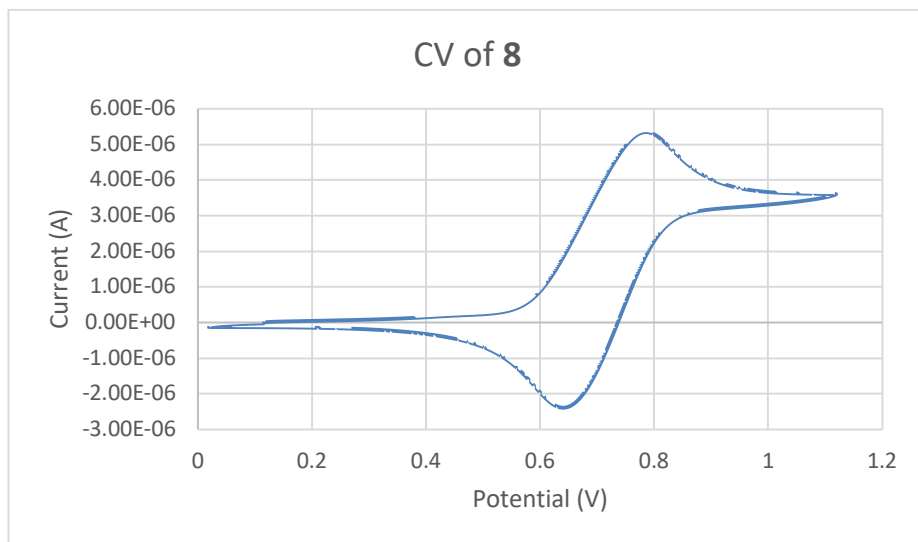

Cyclic Voltammogram ( $\text{CH}_2\text{Cl}_2$ /[NBu<sub>4</sub>][PF<sub>6</sub>] (0.1 M) at 25 °C at 100 mV s<sup>-1</sup>) of [9-{(Tp\*)(CO)<sub>2</sub>W≡C}C<sub>14</sub>H<sub>9</sub>] (**8**) relative to [Fe(η-C<sub>5</sub>H<sub>5</sub>)<sub>2</sub>]<sup>0/+</sup> = 0.460 V.

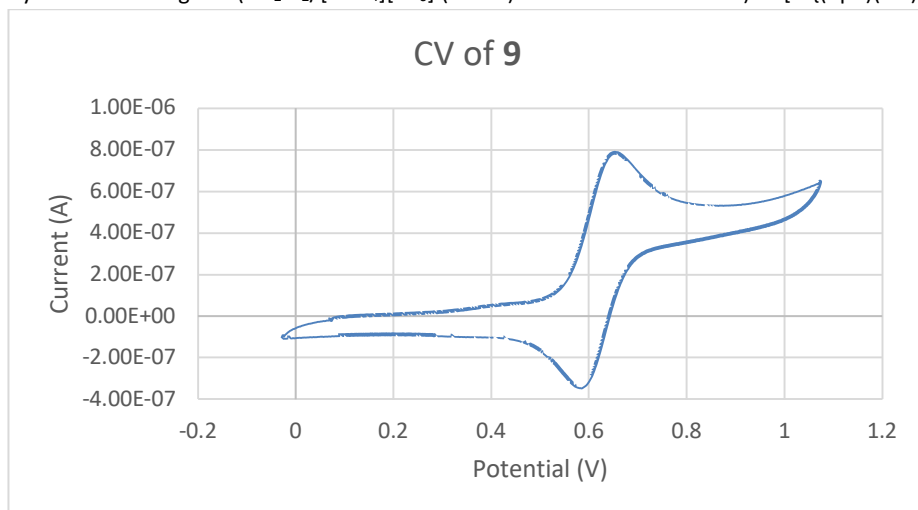

Cyclic Voltammogram ( $\text{CH}_2\text{Cl}_2$ /[NBu<sub>4</sub>][PF<sub>6</sub>] (0.1 M) at 25 °C at 100 mV s<sup>-1</sup>) of [9-{(Tp\*)(CO)<sub>2</sub>W≡C}C<sub>14</sub>H<sub>9</sub>] (**9**) relative to [Fe(η-C<sub>5</sub>H<sub>5</sub>)<sub>2</sub>]<sup>0/+</sup> = 0.460 V.

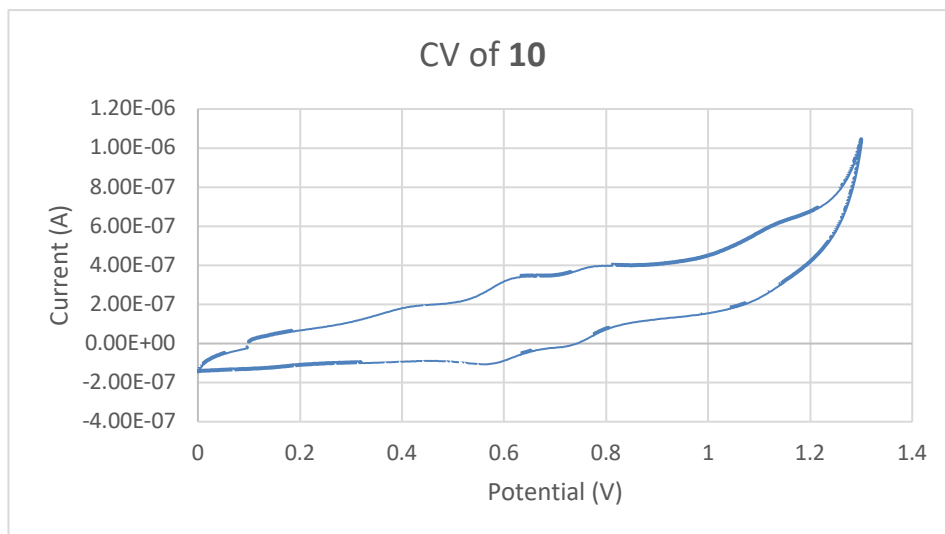

Cyclic Voltammogram ( $\text{CH}_2\text{Cl}_2/[\text{NBu}_4][\text{PF}_6]$  (0.1 M) at  $25^\circ\text{C}$  at  $100\text{ mV s}^{-1}$ ) of  $[9,10\text{-}(\text{Tp}^*)(\text{CO})_2\text{W}\equiv\text{C}_2\text{C}_{14}\text{H}_8]$  (**10**) relative to  $[\text{Fe}(\eta\text{-C}_5\text{H}_5)_2]^{0/+} = 0.460\text{ V}$ .

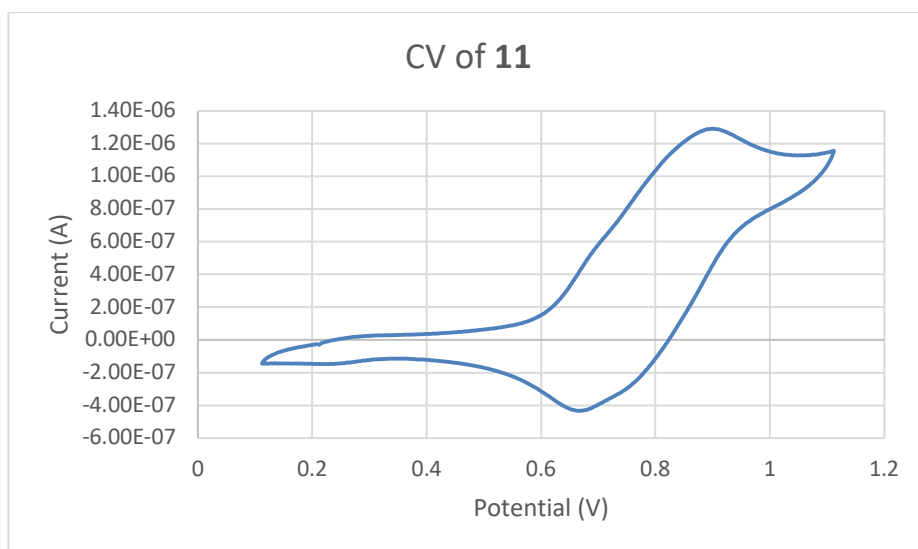

Cyclic Voltammogram ( $\text{CH}_2\text{Cl}_2/[\text{NBu}_4][\text{PF}_6]$  (0.1 M) at  $25^\circ\text{C}$  at  $100\text{ mV s}^{-1}$ ) of  $[1,3,6,8\text{-}(\text{Tp}^*)(\text{CO})_2\text{W}\equiv\text{C}_4\text{C}_{16}\text{H}_6]$  (**11**) relative to  $[\text{Fe}(\eta\text{-C}_5\text{H}_5)_2]^{0/+} = 0.460\text{ V}$ .

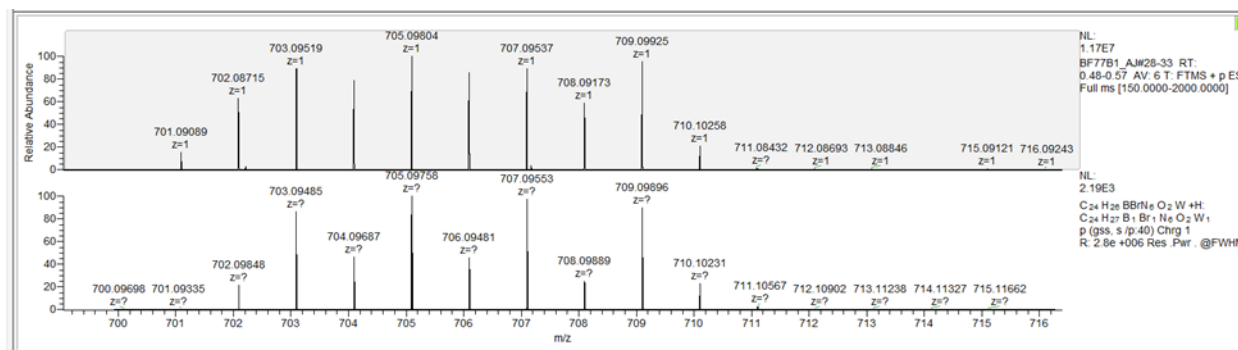Mass spectrum (ESI, m/z, +ve ion) of **2**.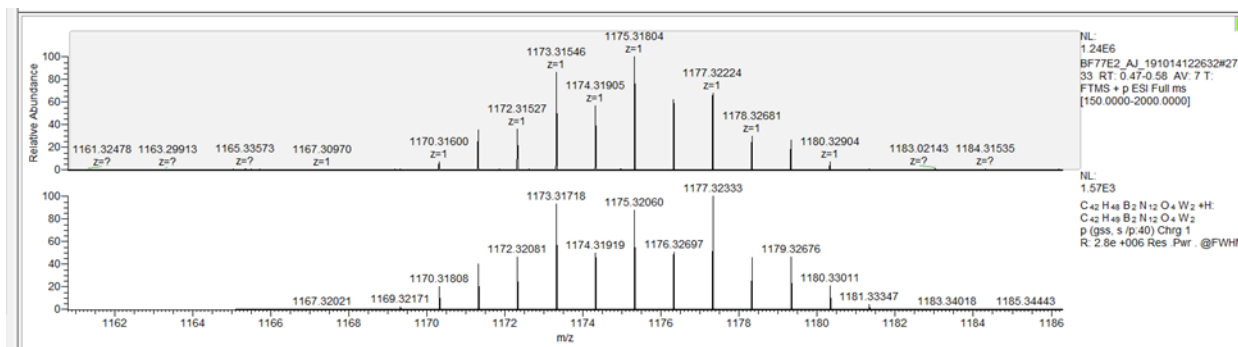Mass spectrum (ESI, m/z, +ve ion) of **3**.

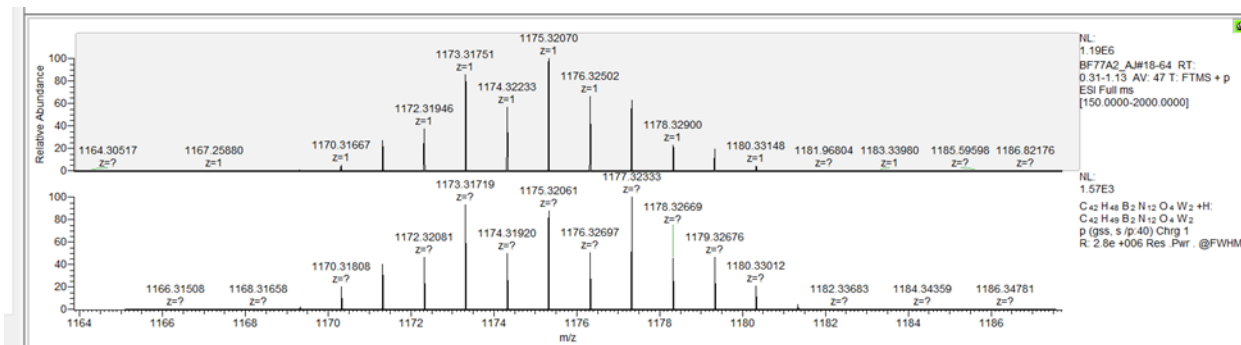

Mass spectrum (ESI, m/z, +ve ion) of 4.

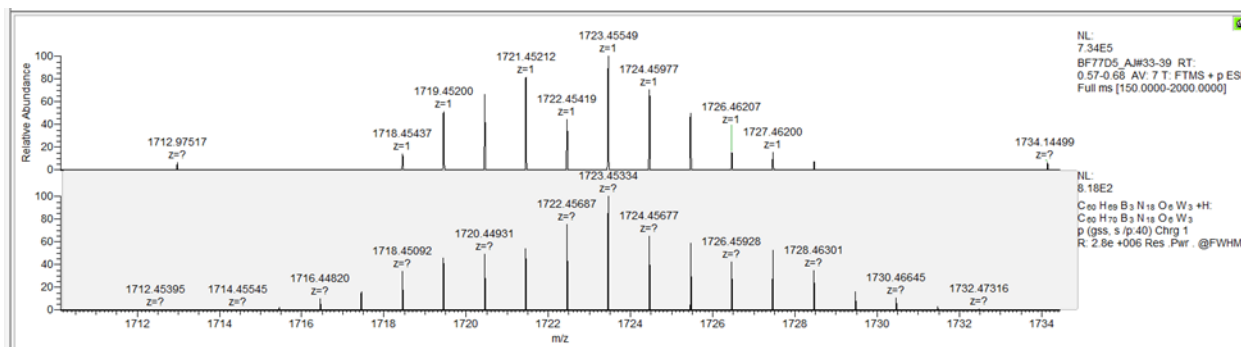

Mass spectrum (ESI, m/z, +ve ion) of 5.

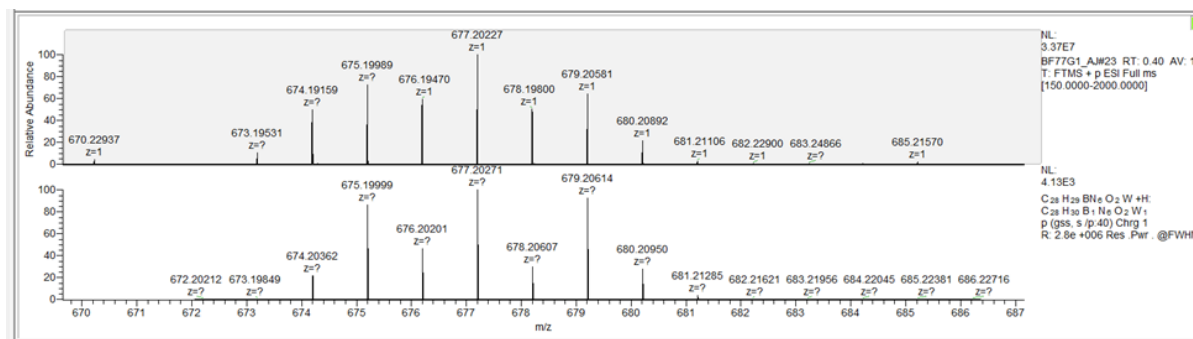

Mass spectrum (ESI, m/z, +ve ion) of 6.

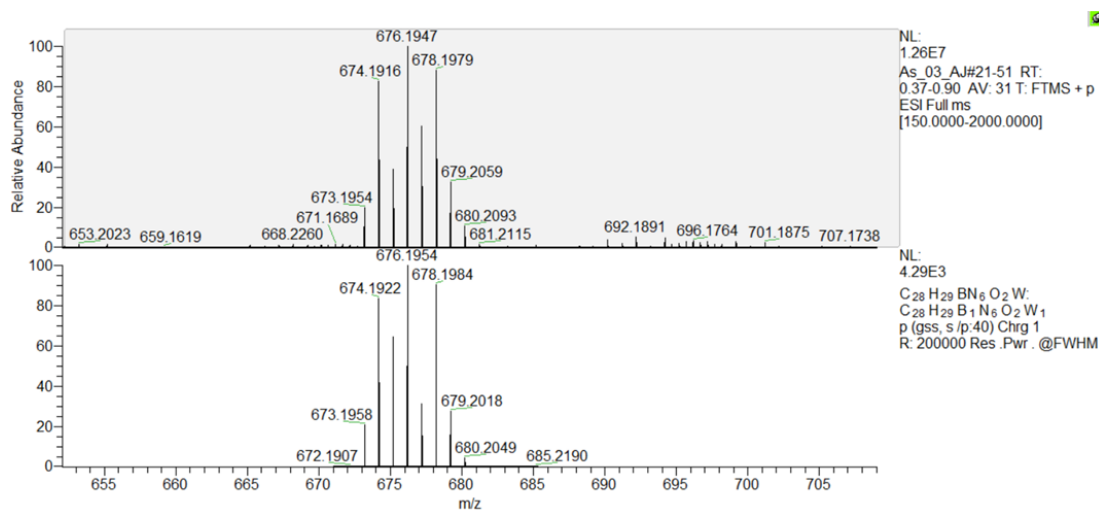

Mass spectrum (ESI, m/z, +ve ion) of 7.

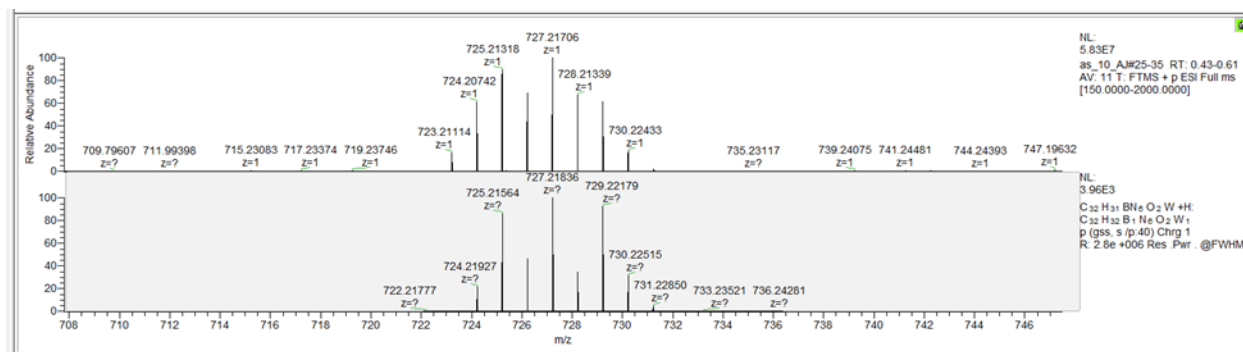

Mass spectrum (ESI, m/z, +ve ion) of 8.

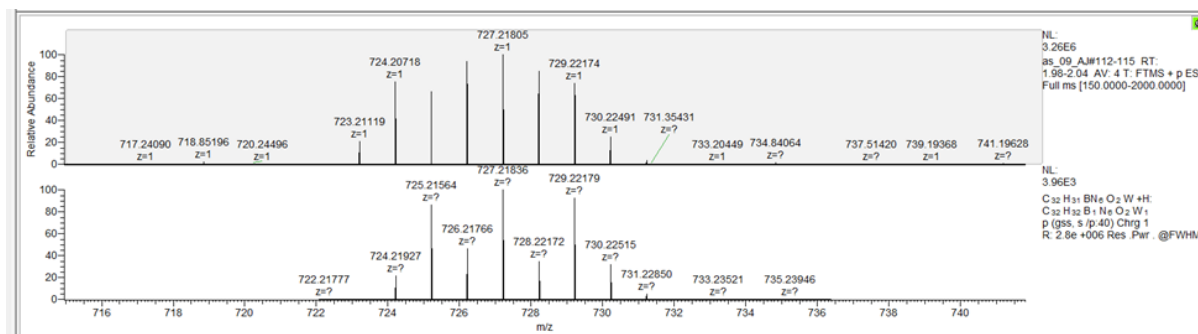

Mass spectrum (ESI, m/z, +ve ion) of 9.



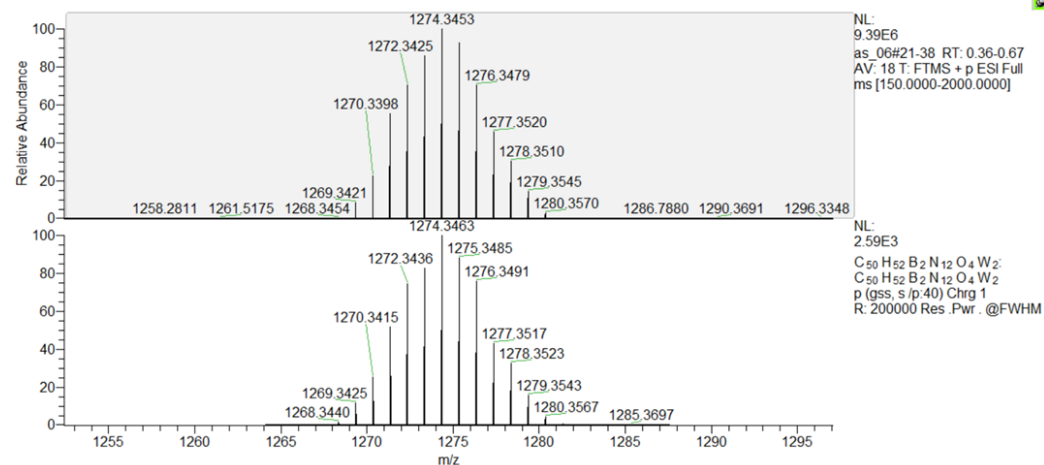Mass spectrum (ESI, m/z, +ve ion) of **10**.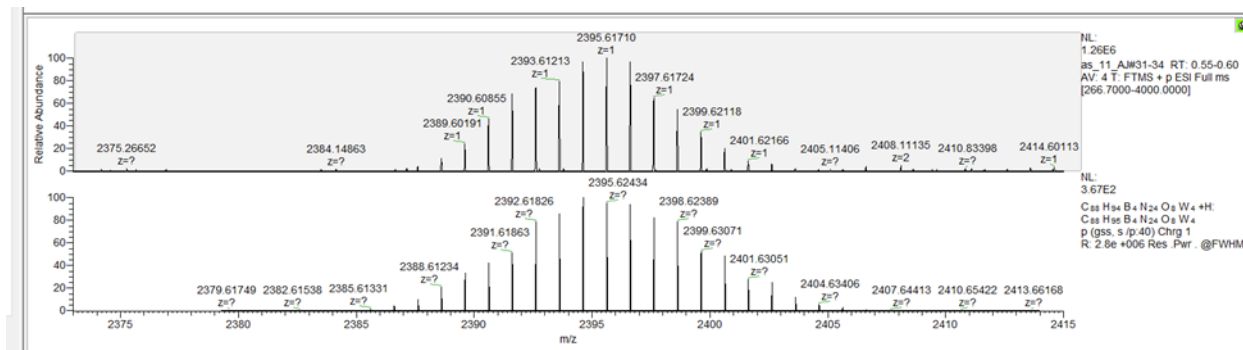Mass spectrum (ESI, m/z, +ve ion) of **11**.
